# Supplementary material for: Rapid Room‐Temperature, Chemoselective Csp2 −Csp2 Coupling of Poly(pseudo)halogenated Arenes Enabled by Palladium(I) Catalysis in Air
Source: PubMed Central journal article supplement — Angew Chem Int Ed Engl. 2016 Dec 29;56(6):1581–5. doi: 10.1002/anie.201609635 (PMC5299498; doi:10.1002/anie.201609635), 2016-12-29
Supplement: ANIE-56-1581-s001.pdf [file ANIE-56-1581-s001.pdf]

Supporting Information

**Rapid Room-Temperature, Chemoselective C<sub>sp<sup>2</sup></sub>–C<sub>sp<sup>2</sup></sub> Coupling of Poly(pseudo)halogenated Arenes Enabled by Palladium(I) Catalysis in Air**

*Indrek Kalvet, Guillaume Magnin, and Franziska Schoenebeck\**

anie\_201609635\_sm\_miscellaneous\_information.pdf

# Contents

|        |                                                                                          |    |
|--------|------------------------------------------------------------------------------------------|----|
| 1.     | General Information .....                                                                | 3  |
| 2.     | Experimental procedures .....                                                            | 4  |
| 2.1.   | General procedure for Pd <sup>(I)</sup> -dimer catalyzed cross-coupling reactions .....  | 4  |
| 2.1.1. | <i>Kumada cross-coupling reaction</i> .....                                              | 4  |
| 2.1.2. | <i>Negishi cross-coupling reaction</i> .....                                             | 4  |
| 2.1.3. | <i>Coupling of a sterically challenging substrate</i> .....                              | 5  |
| 2.1.4. | <i>Gram-scale Kumada cross-coupling reaction</i> .....                                   | 5  |
| 2.2.   | ReactIR studies .....                                                                    | 6  |
| 2.3.   | Mechanistic experiments .....                                                            | 7  |
| 2.3.1. | <i>Oxygen-assisted formation of Pd<sup>(I)</sup>-I dimer from Pd<sup>(0)</sup></i> ..... | 7  |
| 2.3.2. | <i>Performance of air-stable Pd-precatalysts</i> .....                                   | 8  |
| 3.     | Synthetic procedures .....                                                               | 10 |
| 3.1.   | Synthesis of poly(pseudo)halogenated starting materials .....                            | 10 |
| 3.1.1. | <i>Synthesis of 3-(adamantan-1-yl)-4-bromo-5-methoxyphenol</i> .....                     | 10 |
| 3.1.2. | <i>General procedure for the synthesis of aryl triflates</i> .....                       | 10 |
| 4.     | Characterization data .....                                                              | 11 |
| 4.1.   | Characterization data of aryl triflates .....                                            | 11 |
| 4.2.   | Characterization data of cross-coupling products .....                                   | 14 |
| 5.     | Computational details .....                                                              | 20 |
| 6.     | NMR spectra .....                                                                        | 38 |
| 7.     | References .....                                                                         | 83 |

## 1. General Information

$^1\text{H}$ ,  $^{13}\text{C}$  and  $^{19}\text{F}$  NMR spectra were recorded either on Varian V-NMRS 600, Varian V-NMRS 400 or Varian Mercury 300 spectrometer.  $^1\text{H}$  and  $^{13}\text{C}$  spectra are referenced to residual solvent signals;  $\text{CDCl}_3$  7.26 ppm for  $^1\text{H}$  and 77.0 ppm for  $^{13}\text{C}$  and benzene- $d_6$  7.16 ppm for  $^1\text{H}$ . Chemical shifts ( $\delta$ ) of  $^{19}\text{F}$  NMR spectra are reported in ppm relative to trifluorotoluene (-62.78 ppm). Chemical shifts ( $\delta$ ) of  $^{31}\text{P}$  NMR spectra are given in ppm relative to trimethyl phosphate (2.36 ppm). Coupling constants ( $J$ ) are reported in Hz and coupling patterns are described as br = broad, s = singlet, d = doublet, t = triplet, q = quartet, m = multiplet. High resolution mass spectra (HRMS) were recorded on Thermo Scientific LTQ Orbitrap XL (ESI) or Finnigan MAT 95 (EI) spectrometer in positive ion mode. Melting points were measured with a Büchi Melting Point B-540 apparatus. Flash column chromatography was performed with Merck silica gel 60 (35–70 mesh). Thin layer chromatography (TLC) analyses were performed with aluminum sheets silica gel 60 F254 from Merck with detection by UV light.

In-situ FTIR reaction analysis was performed using a Mettler-Toledo ReactIR<sup>TM</sup> 15 instrument fitted with a DST Series AgX Fiber Conduit probe.

Toluene, THF, hexane and DCM were dried by solvent purification system (Innovative Technology PS-MD-5). Unless stated otherwise, other anhydrous solvents as well as all starting materials, ligands and Pd-complexes were commercially available and used as received. Solvents used for column chromatography (pentane, hexane, ethyl acetate and DCM) were received in technical grade and distilled prior to use.  $\text{Pd}^{(I)}$ -dimer<sup>[1]</sup> and  $\text{Pd}(\text{P}t\text{Bu}_3)_2$ <sup>[2]</sup> were prepared according to their corresponding literature procedures.

## 2. Experimental procedures

### 2.1. General procedure for Pd<sup>(I)</sup>-dimer catalyzed cross-coupling reactions

#### 2.1.1. Kumada cross-coupling reaction

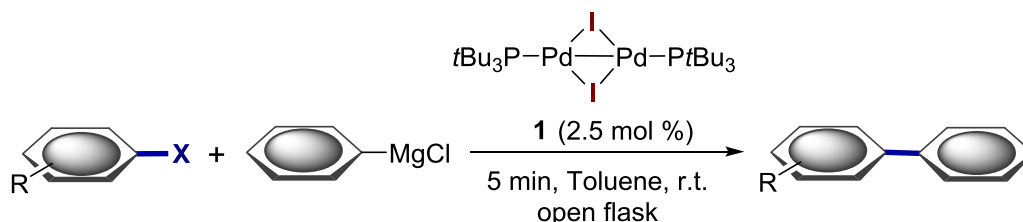

To a stirred solution of aryl halide (0.2 mmol) and Pd<sup>(I)</sup>-I-dimer (4.3 mg, 5  $\mu\text{mol}$ ) in 3 mL of toluene was added PhMgCl (2M in THF, 150  $\mu\text{L}$ , 0.3 mmol). The reaction was stirred for 5 minutes. The reaction mixture was quenched by  $\text{NH}_4\text{Cl}$  and filtered. The filtrate was concentrated under reduced pressure and the crude material was purified by silica gel column chromatography.

#### 2.1.2. Negishi cross-coupling reaction

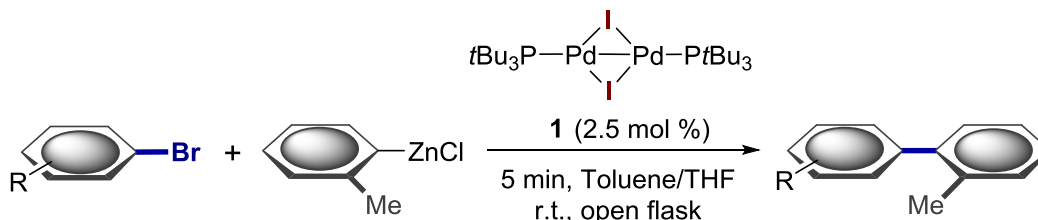

To a dry 16 mL vial under Ar atmosphere were added *o*-tolyl-MgCl (1M in THF, 600  $\mu\text{L}$ , 0.6 mmol) and  $\text{ZnCl}_2$  (1M in THF, 640  $\mu\text{L}$ , 0.64 mmol) and stirred for 15 minutes. Followingly, the vial was opened and a solution of aryl bromide (0.4 mmol) and Pd<sup>(I)</sup>-I-dimer (8.7 mg, 0.01 mmol) in 1.5 mL of anhydrous toluene was added and the reaction mixture was stirred for 5 minutes. Thereafter, the reaction mixture was diluted with 3 mL of hexane and the solid residue was removed by filtration through a short plug of silica. The filtrate was concentrated under reduced pressure and the crude material was extracted with MeCN to precipitate most of the remaining Pd(I) dimer catalyst. The solution phase was filtered through a short plug of silica and concentrated under reduced pressure. The obtained crude material was purified by silica gel column chromatography.

Preparation of the solution of  $\text{ZnCl}_2$ :<sup>[3]</sup> To an oven-dried, septum-capped Schlenk flask, equipped with a stir-bar was added 2.73 g (20 mmol) of  $\text{ZnCl}_2$ . Upon heating in vacuo at 140  $^\circ\text{C}$  for 12 hours the flask was refilled with argon and allowed to cool to room temperature. 20 mL of anhydrous THF was subsequently added and the solution stirred for 1 hour.

### 2.1.3. Coupling of a sterically challenging substrate

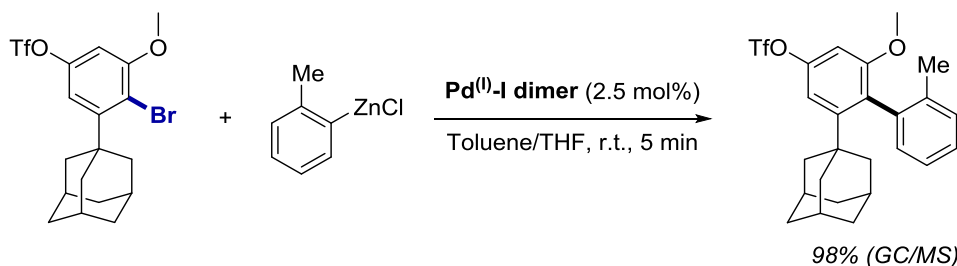

To a dry 4 mL vial under Ar atmosphere were added *o*-tolyl-MgCl (1M in THF, 150  $\mu$ L, 0.15 mmol) and ZnCl<sub>2</sub> (1M in THF, 160  $\mu$ L, 0.16 mmol) and the mixture was stirred for 15 minutes. The vial was then opened and a solution of aryl bromide (47 mg, 0.1 mmol) and Pd<sup>(I)</sup>-I-dimer (2.2 mg, 2.5  $\mu$ mol) in 0.5 mL of anhydrous toluene was added and the reaction mixture was stirred in an open vial for 5 minutes. Conversion to the desired coupling product was thereafter determined by calibrated quantitative GC/MS analysis using mesitylene as internal standard.

**2-(Adamantan-1-yl)-6-methoxy-2'-methyl-[1,1'-biphenyl]-4-yl trifluoromethanesulfonate:** Prepared using 141 mg (0.3 mmol) of 3-(Adamantan-1-yl)-4-bromo-5-methoxyphenyl trifluoromethanesulfonate. The title product was obtained after purification by column chromatography (Hexane  $\rightarrow$  20:1 Hexane/EtOAc) as a colorless oil. 112 mg (78%).  $R_f = 0.77$  (10:1 Hexane/EtOAc). <sup>1</sup>H NMR (400 MHz, CDCl<sub>3</sub>)  $\delta$  7.31 – 7.18 (m, 4H), 7.15 (s, 1H), 6.80 (s, 1H), 3.89 (s, 3H), 2.17 (s, 3H), 2.08 (br, 9H), 1.77 (br, 6H). <sup>13</sup>C NMR (101 MHz, CDCl<sub>3</sub>)  $\delta$  158.7, 145.0, 138.7, 136.7, 135.5, 130.7, 130.0, 129.9, 128.1, 126.3, 125.5, 118.3 (q,  $J = 320.2$  Hz), 104.8, 55.4, 40.5, 37.1, 37.0, 28.9, 19.9. <sup>19</sup>F NMR (376 MHz, CDCl<sub>3</sub>)  $\delta$  -74.43. HRMS (ESI) calculated for C<sub>25</sub>H<sub>27</sub>F<sub>3</sub>O<sub>4</sub>SNa: 503.1474 [M+Na]<sup>+</sup>, found: 503.1456.

### 2.1.4. Gram-scale Kumada cross-coupling reaction

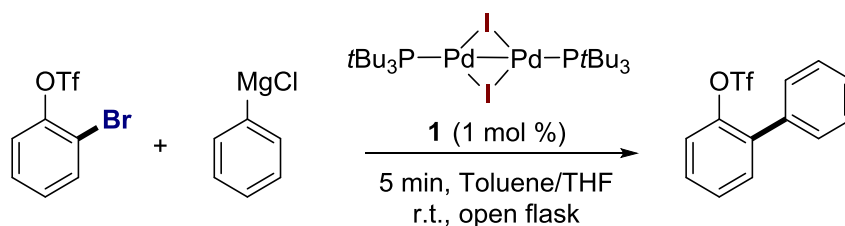

To a stirred solution of 2-Bromophenyl trifluoromethanesulfonate (1g, 3.28 mmol) and Pd<sup>(I)</sup>-I-dimer (28 mg, 0.033 mmol) in 30 mL of toluene was added PhMgCl (1M in THF, 4.9 mL, 4.9 mmol). The reaction was stirred for 5 minutes. Thereafter, the reaction mixture was diluted with 30 mL of pentane and the solid residue was removed by filtration through a short plug of silica and concentrated under reduced pressure. The obtained crude material was purified by silica gel column chromatography (100% pentane) to obtain 0.940 g of 2-trifluoromethanesulfonyloxybiphenyl as a colorless oil in 95% yield.

*Notes for safety:*

- 1) *Organozinc and -magnesium reagents are moisture-sensitive and may react violently in air. As such, proper precautions should be taken when handling them in larger amounts.*
- 2) *Due to high rate and exothermicity of the reaction, appropriate temperature control must be considered when further scaling up the reaction.*

## 2.2. ReactIR studies

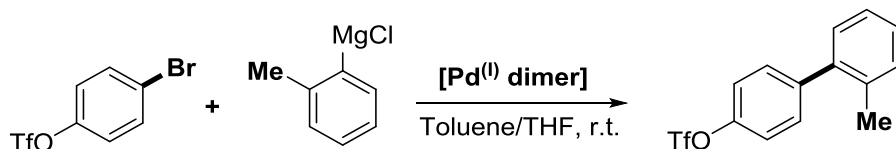

The ReactIR probe was immersed into a stirred solution of 4-bromophenyl triflate (61 mg, 0.2 mmol) and Pd-catalyst (Pd<sup>(I)</sup> dimer: 4.4 mg, 5  $\mu$ mol) in 1.5 mL of anhydrous toluene. Data collection was started in the ‘rapid collect’ mode, and after 30 seconds (*o*-tolyl)MgCl (1M in THF, 300  $\mu$ L, 0.3 mmol) was added. During data acquisition, samples were also taken for GC/MS analysis, and in the end, the reaction was further analyzed by quantitative <sup>19</sup>F NMR to determine the reaction yield.

**Data analysis:** Initial data treatment was undertaken using the iC IR software. The solvent background of 10:1 Toluene/THF was subtracted from the collected data. Co-addition of two spectra was used for the data obtained in the ‘rapid collect’ mode (yielding a resolution of 2 seconds per spectrum). Heights or surface areas of 2-4 peaks in the 860-720  $\text{cm}^{-1}$  region were chosen to plot the changes in the concentrations of the starting material and the product. The raw absorption/time data were exported to MS Excel and normalized according to the obtained quantitative <sup>19</sup>F NMR and GC/MS data to describe the changes in the reaction yield during the course of the reaction.

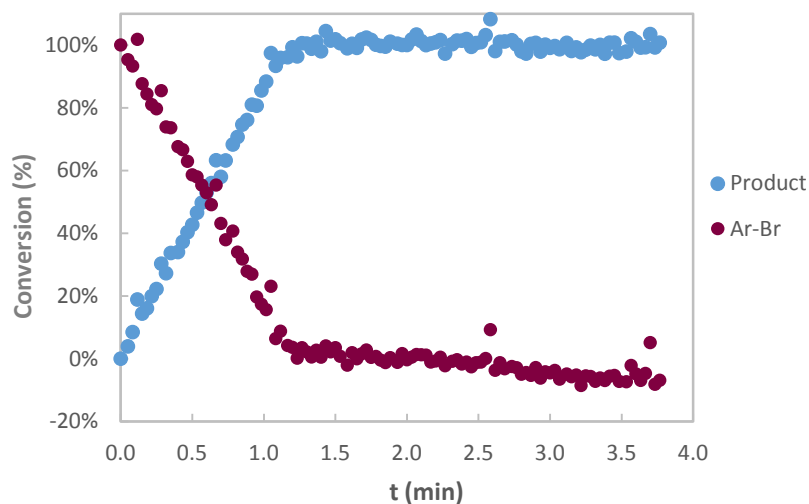

**Figure S1.** ReactIR traces of Pd<sup>(I)</sup>-I dimer catalyzed Kumada cross-coupling reaction between 4-bromophenyl triflate and (*o*-tolyl)MgCl.

## 2.3. Mechanistic experiments

### 2.3.1. Oxygen-assisted formation of Pd<sup>(I)</sup>-I dimer from Pd<sup>(0)</sup>

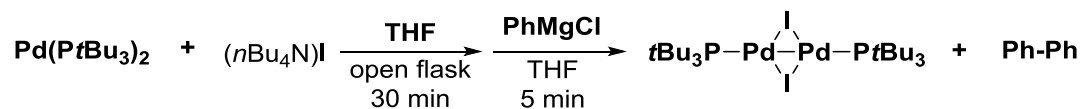

Inside an argon-filled glovebox, a mixture of Pd(PtBu<sub>3</sub>)<sub>2</sub> (10 mg, 0.02 mmol) and (nBu<sub>4</sub>N)I (74 mg, 0.2 mmol) in 1 mL of THF was prepared and taken out, to be stirred under open flask conditions. The reaction gradually turned yellow, and after 30 minutes PhMgCl (2M in THF, 20 μL, 0.04 mmol) was added, and the solution immediately turned dark brown. The mixture was subsequently qualitatively analyzed by <sup>31</sup>P NMR and GC/MS.

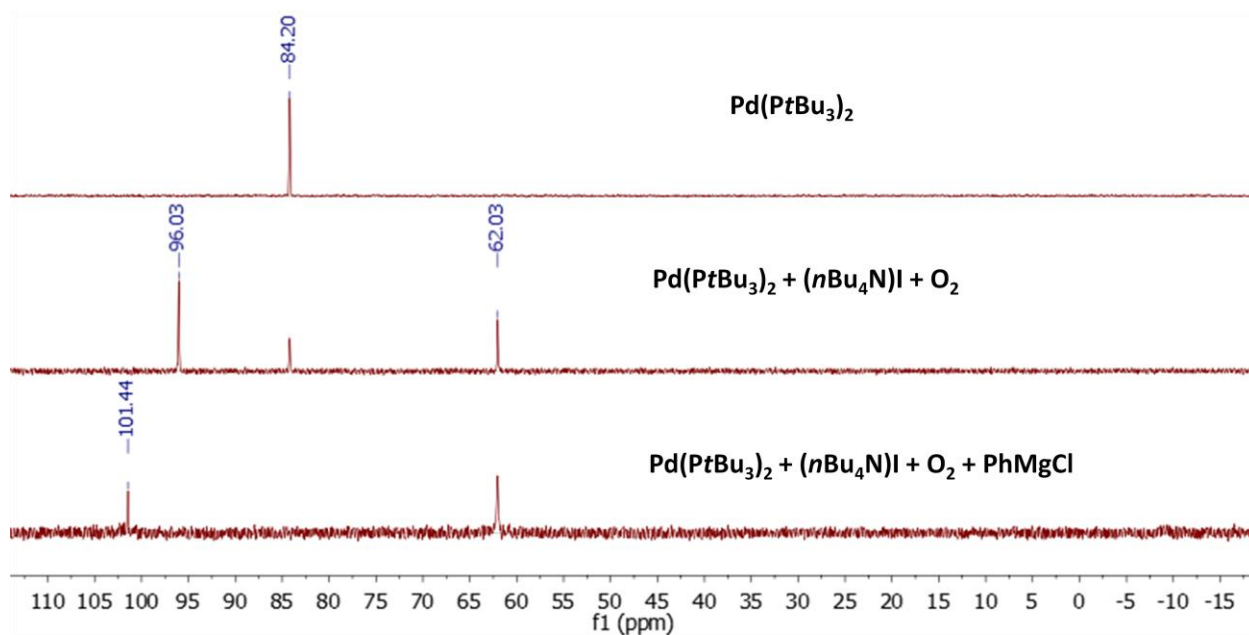

**Figure S2.** <sup>31</sup>P NMR (121 MHz, THF) spectra of Pd(PtBu<sub>3</sub>)<sub>2</sub> (top); Pd(PtBu<sub>3</sub>)<sub>2</sub> + “I<sup>-</sup>” + PhMgCl stirred in an open flask (bottom). Signal assignments: Pd<sup>(I)</sup>-I dimer (101.4 ppm), Pd(PtBu<sub>3</sub>)<sub>2</sub> (84.2 ppm), free PtBu<sub>3</sub> (62.0 ppm). All shifts are reported relative to (MeO)<sub>3</sub>PO as an internal standard (δ = 2.36 ppm). Non-quantitative <sup>31</sup>P NMR.

### 2.3.2. Performance of air-stable Pd-precatalysts

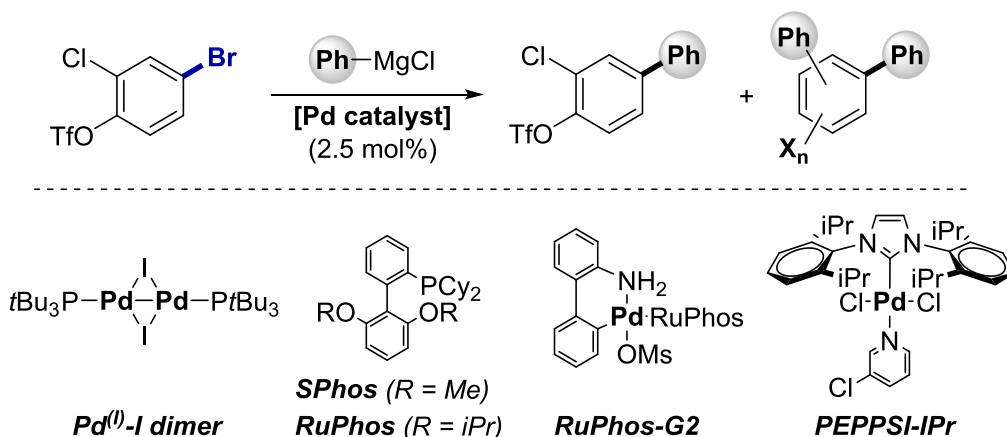

**General procedure:** To a solution of 4-bromo-2-chlorophenyl trifluoromethanesulfonate (34 mg, 0.1 mmol) and Pd-catalyst (2.5  $\mu\text{mol}$ ) in toluene ( $\text{Pd}^{\text{I}}$ -dimer) or THF (other precatalysts) was added  $\text{PhMgCl}$  (2M in THF, 75  $\mu\text{L}$ , 0.15 mmol). The reactions with  $\text{SPhos}$  and  $\text{RuPhos}$  ligands were stirred under argon atmosphere and  $\text{Pd}^{\text{I}}$ -I dimer and  $\text{PEPPSI-IPr}$  catalyzed reactions were run under open flask conditions. Samples were taken at various intervals for GC/MS analysis until changes in the composition of the mixture could be not observed anymore.

As a consequence, the following chromatograms were obtained, describing the relative reactivities of the tested Pd-(pre)catalysts.

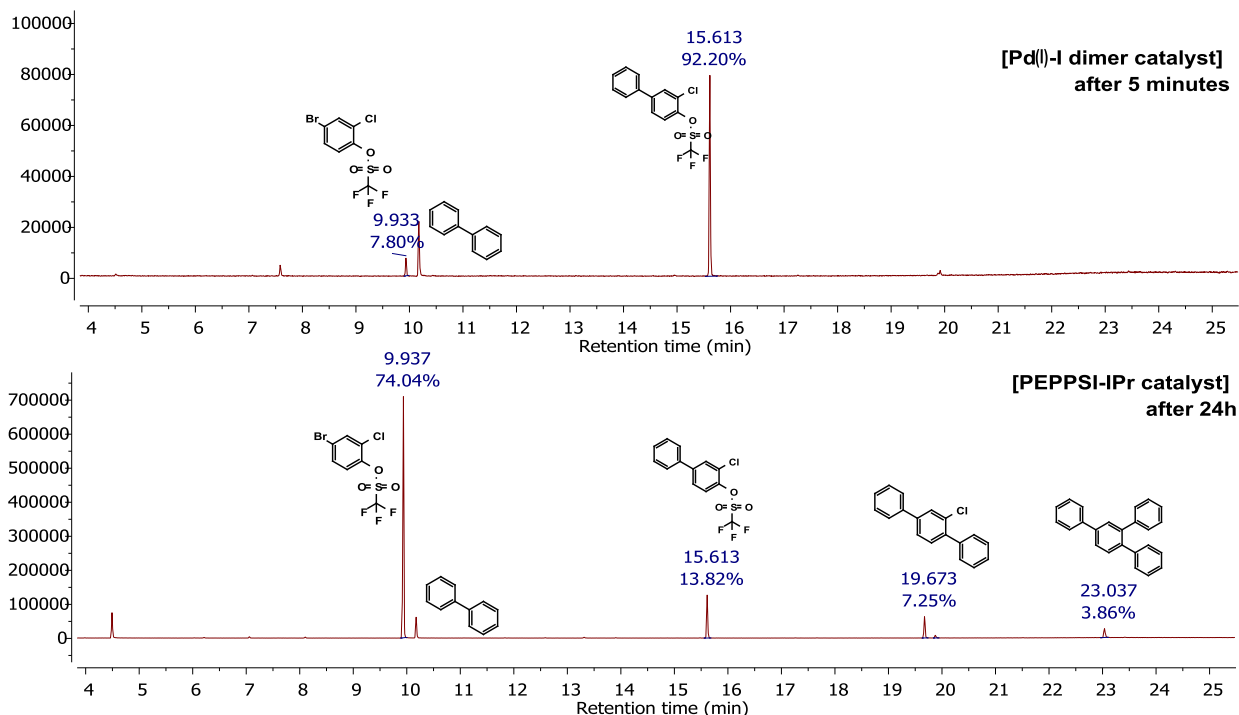



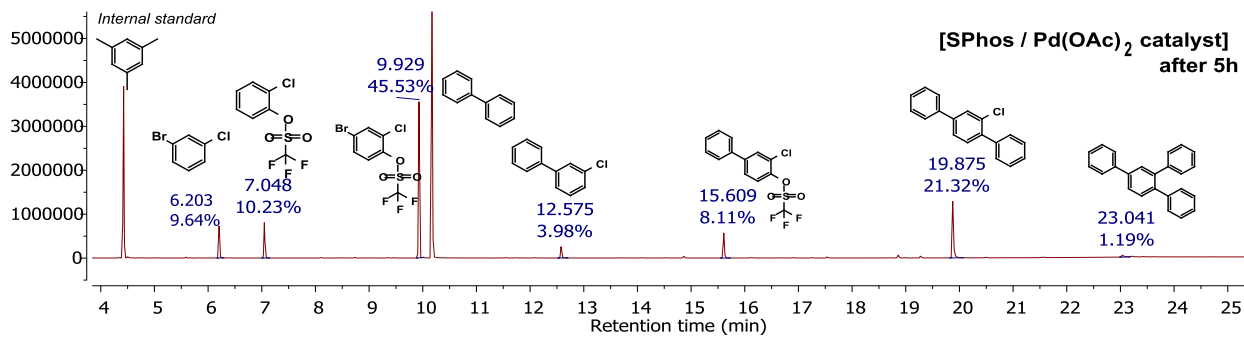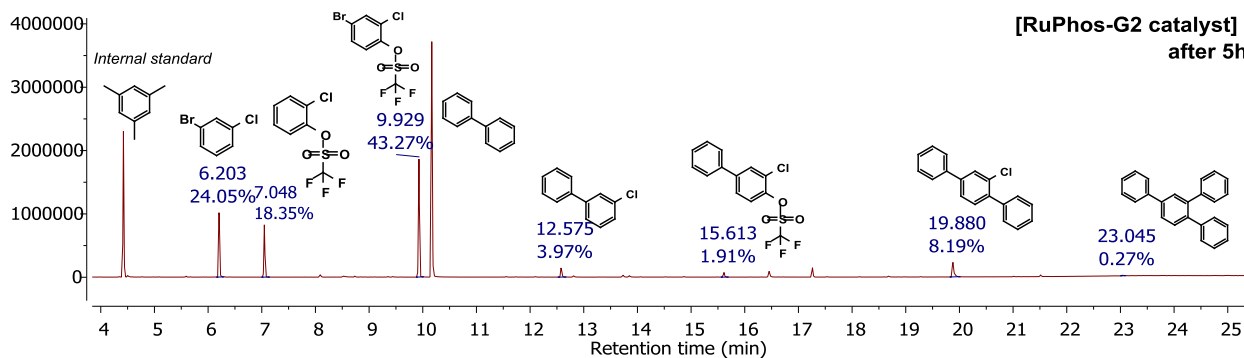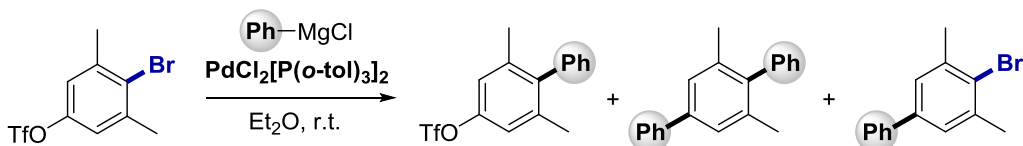

Performed following a published procedure<sup>[4]</sup>: to a mixture of 4-bromo-3,5-dimethylphenyl trifluoromethanesulfonate (67 mg, 0.2 mmol) and PdCl<sub>2</sub>[P(*o*-tol)<sub>3</sub>]<sub>2</sub> (8 mg, 0.01 mmol) in Et<sub>2</sub>O (0.1 mL) was added PhMgCl (1M in Et<sub>2</sub>O, 0.4 mL, 0.4 mmol). The reaction was stirred at room temperature, under argon atmosphere for 2 hours. Thereafter, the mixture was analyzed by GC/MS and the following results were obtained:

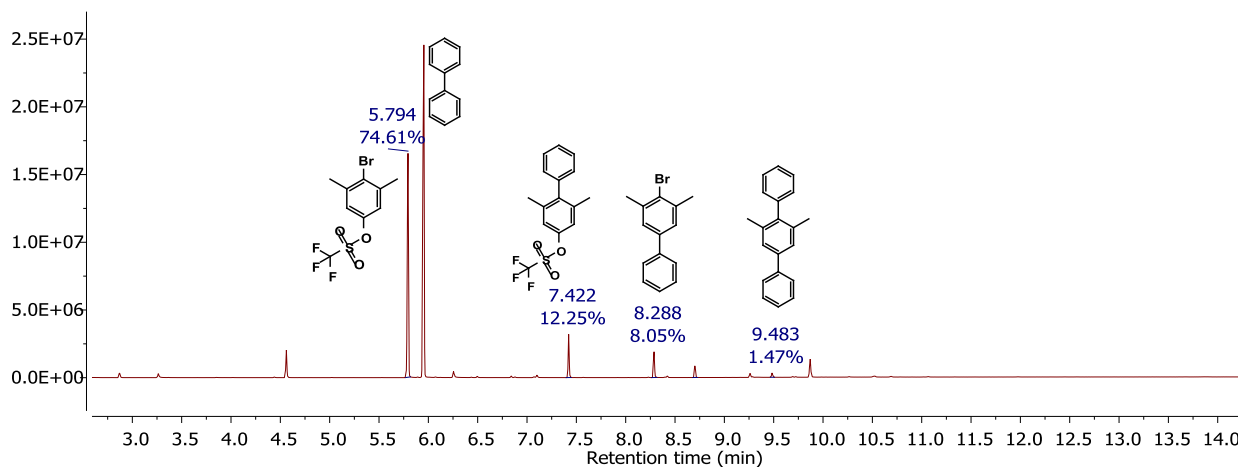

### 3. Synthetic procedures

#### 3.1. Synthesis of poly(pseudo)halogenated starting materials

##### 3.1.1. Synthesis of 3-(adamantan-1-yl)-4-bromo-5-methoxyphenol

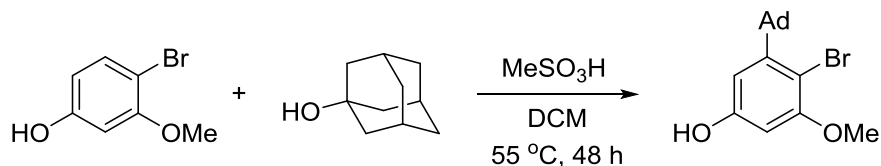

Performed according to a published procedure.<sup>[5]</sup> A mixture of 4-bromo-5-methoxyphenol (950 mg, 4.68 mmol), 1-adamantanol (712 mg, 4.68 mmol) and methanesulfonic acid (200  $\mu$ L) in 3.5 mL of DCM was stirred at 55 °C for 48 hours. The resulting solution was diluted with water and extracted with EtOAc. The organic phase was washed with water, 5% aq. NaHCO<sub>3</sub> and brine, dried over MgSO<sub>4</sub> and concentrated under reduced pressure. The obtained crude material was purified by column chromatography (Hexane  $\rightarrow$  6:1 Hexane/EtOAc) to yield the title compound as an off-white solid. 727 mg (46%). R<sub>f</sub> = 0.21 (10:1 Hexane/EtOAc). <sup>1</sup>H NMR (400 MHz, CDCl<sub>3</sub>)  $\delta$  7.20 (s, 1H), 6.58 (s, 1H), 5.33 (s, 1H), 3.79 (s, 3H), 2.04 (br, 9H), 1.75 (br, 6H). <sup>13</sup>C NMR (101 MHz, CDCl<sub>3</sub>)  $\delta$  159.4, 150.8, 133.0, 129.2, 100.2, 100.1, 55.2, 40.7, 37.0, 36.5, 29.0. MS (70eV, EI): *m/z* (%): 338 (84) 336 (85) [M<sup>+</sup>], 281 (26) 279 (26), 200 (100). These data are in agreement with those reported previously in the literature.<sup>[5]</sup>

##### 3.1.2. General procedure for the synthesis of aryl triflates

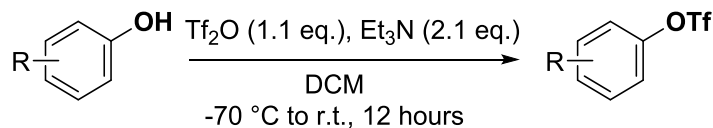

To a cooled (-70 °C) solution of a phenol derivative (9.05 mmol) and Et<sub>3</sub>N (2.52 mL, 18.9 mmol) in DCM (20 mL) was added dropwise Tf<sub>2</sub>O (1.74 mL, 10.3 mmol). The reaction was allowed to slowly warm to room temperature and stirred for 12 hours. Thereafter, water (or saturated aqueous NaHCO<sub>3</sub> in the case of basic products) was added to the mixture, followed by extraction with Et<sub>2</sub>O. The organic layer was washed with saturated aqueous NaHCO<sub>3</sub> and brine, dried over Na<sub>2</sub>SO<sub>4</sub> and concentrated under reduced pressure. The obtained crude material was purified by silica gel column chromatography.

## 4. Characterization data

### 4.1. Characterization data of aryl triflates

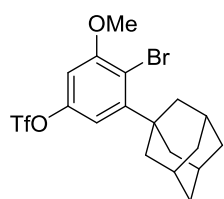

#### **3-(Adamantan-1-yl)-4-bromo-5-methoxyphenyl trifluoromethanesulfonate:**

Prepared using 500 mg (1.48 mmol) of 3-(adamantan-1-yl)-4-bromo-5-methoxyphenol. The title product was obtained after purification by column chromatography (20:1 Hexane/EtOAc) as a white solid. 494 mg (71%).  $R_f = 0.36$  (Hexane). M.p. 127 - 128 °C.  $^1\text{H NMR}$  (400 MHz,  $\text{CDCl}_3$ )  $\delta$  7.41 (s, 1H), 6.79 (s, 1H), 3.83 (s, 3H), 2.07 (br, 3H), 2.03 (br, 6H), 1.76 (br, 6H).  $^{13}\text{C NMR}$  (101 MHz,  $\text{CDCl}_3$ )  $\delta$  158.8, 145.1, 140.7, 131.6, 118.6 (d,  $J = 320.7$  Hz), 106.3, 105.5, 55.5, 40.2, 37.2, 36.8, 28.8.  $^{19}\text{F NMR}$  (376 MHz,  $\text{CDCl}_3$ )  $\delta$  -73.40. HRMS (ESI) calculated for  $\text{C}_{18}\text{H}_{20}\text{BrF}_3\text{O}_4\text{SNa}$ : 491.0110  $[\text{M}+\text{Na}]^+$ , found: 491.0108.

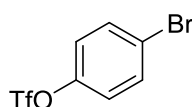

#### **4-Bromophenyl trifluoromethanesulfonate:**

Prepared using 1.57 g (9.05 mmol) of 4-bromophenol. The title product was obtained after purification by column chromatography (Hexane) as a colorless oil. 2.185 g (79%).  $R_f = 0.35$  (Hexane).  $^1\text{H NMR}$  (400 MHz,  $\text{CDCl}_3$ )  $\delta$  7.62 - 7.54 (2H, d,  $J = 9.0$  Hz), 7.21 - 7.13 (2H, d,  $J = 9.0$  Hz).  $^{13}\text{C NMR}$  (101 MHz,  $\text{CDCl}_3$ )  $\delta$  148.5, 133.4, 123.1, 122.0, 118.7 (q,  $J = 321.0$  Hz).  $^{19}\text{F NMR}$  (376 MHz,  $\text{CDCl}_3$ )  $\delta$  -72.79. MS (70eV, EI):  $m/z$  (%): 306 (44) 304 (42)  $[\text{M}^+]$ , 173 (98) 171 (100), 143 (71) 145 (69), 69 (44), 63 (47). These data are in agreement with those reported previously in the literature.<sup>[6]</sup>

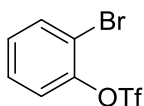

#### **2-Bromophenyl trifluoromethanesulfonate:**

Prepared using 0.80 g (4.62 mmol) of 4-bromo-2-chlorophenol. The title product was obtained after purification by column chromatography (20:1 Pentane/EtOAc) as a colorless oil. 1.13 g (80%).  $R_f = 0.36$  (20:1 pentane/EtOAc).  $^1\text{H NMR}$  (300 MHz,  $\text{CDCl}_3$ )  $\delta$  7.73-7.67 (m, 1H), 7.44-7.33 (m, 2H), 7.31-7.22 (m, 1H).  $^{13}\text{C NMR}$  (151 MHz,  $\text{CDCl}_3$ )  $\delta$  147.2, 134.6, 129.6, 129.2, 123.0, 118.7 (q,  $J = 321.0$  Hz), 116.1.  $^{19}\text{F NMR}$  (282 MHz,  $\text{CDCl}_3$ )  $\delta$  -73.40 (s). MS (70eV, EI):  $m/z$  (%): 306 (74) 304 (72)  $[\text{M}^+]$ , 242 (28) 240 (29) 173 (100), 171 (100) 145 (96) 143 (98), 95 (7), 92 (20), 69 (48), 63 (50). These data are in agreement with those reported previously in the literature.<sup>[7]</sup>

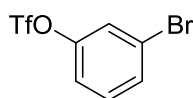

#### **3-Bromophenyl trifluoromethanesulfonate:**

Prepared using 0.80 g (4.62 mmol) of 4-bromo-2-chlorophenol. The title product was obtained after purification by column chromatography (2:1 Pentane/EtOAc) as a colorless oil. 1.27 g (90%).  $R_f = 0.35$  (2:1 Pentane/EtOAc).  $^1\text{H NMR}$  (600 MHz,  $\text{CDCl}_3$ )  $\delta$  7.55 (d,  $J = 8.2$  Hz, 1H), 7.46 (d,  $J = 2.2$  Hz, 1H), 7.34 (d,  $J = 8.2$  Hz, 1H), 7.25 (dd,  $J = 8.2, 2.2$  Hz, 1H).  $^{13}\text{C NMR}$  (151 MHz,  $\text{CDCl}_3$ )  $\delta$  149.5, 131.8, 131.2, 124.8, 123.1, 120.2, 118.6 (q,  $J = 320.9$  Hz).  $^{19}\text{F NMR}$  (564 MHz,  $\text{CDCl}_3$ )  $\delta$  -72.74. MS (70eV, EI):  $m/z$  (%): 306 (100) 304 (97)  $[\text{M}^+]$ , 242 (62) 240 (63) 173 (33), 171 (34) 145 (77) 143 (79), 95 (50), 92 (37), 69 (78), 63 (63). These data are in agreement with those reported previously in the literature.<sup>[8]</sup>

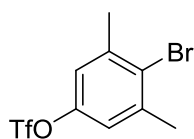

**5-Bromo-4-methylpyridin-2-yl trifluoromethanesulfonate:** Prepared using 0.80 g (4.00 mmol) of 4-bromo-3,5-dimethylphenol. The title product was obtained after purification by column chromatography (20:1 Pentane/EtOAc) as a colorless oil. 1.32 g (94%).  $R_f = 0.42$  (2:1 Pentane/EtOAc).  $^1\text{H NMR}$  (600 MHz,  $\text{CDCl}_3$ )  $\delta$  7.01 (s, 2H), 2.45 (s, 6H).  $^{13}\text{C NMR}$  (151 MHz,  $\text{CDCl}_3$ )  $\delta$  147.8, 141.0, 127.2, 120.7, 118.8 (q,  $J = 320.8$  Hz), 24.2.  $^{19}\text{F NMR}$  (376 MHz,  $\text{CDCl}_3$ )  $\delta$  -72.90 (s). MS (70eV, EI):  $m/z$  (%): 334 (61), 332 (60),  $[\text{M}^+]$ , 201 (97) 199 (100), 173 (92), 171 (94), 92 (39), 91 (85). These data are in agreement with those reported previously in the literature.<sup>[9]</sup>

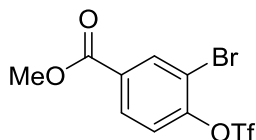

**Methyl 3-bromo-4-(((trifluoromethyl)sulfonyl)oxy)benzoate:** Prepared using 3.00 g (12.98 mmol) of methyl 3-bromo-4-hydroxybenzoate. The title product was obtained after purification by column chromatography (10:1 Pentane/EtOAc) as a colorless oil. 4.63 g (98%).  $R_f = 0.21$  (5:1 Pentane/EtOAc).  $^1\text{H NMR}$  (600 MHz,  $\text{CDCl}_3$ )  $\delta$  8.31 (d,  $J = 12.4$  Hz, 1H), 8.02 (d,  $J = 8.6$  Hz, 1H), 7.40 (d,  $J = 8.6$  Hz, 1H).  $^{13}\text{C NMR}$  (151 MHz,  $\text{CDCl}_3$ )  $\delta$  164.4, 150.0, 135.7, 131.4, 130.4, 122.9, 118.6 (q,  $J = 320.6$  Hz), 116.1, 52.8.  $^{19}\text{F NMR}$  (564 MHz,  $\text{CDCl}_3$ )  $\delta$  -73.43. MS (70eV, EI):  $m/z$  (%): 369 (63), 362 (62),  $[\text{M}^+]$ , 333 (26) 331 (25), 269 (98), 267 (94), 269 (98), 230 (66), 229 (68), 203 (30), 201 (32), 175 (51), 173 (54). These data are in agreement with those reported previously in the literature.<sup>[10]</sup>

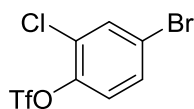

**4-Bromo-2-chlorophenyl trifluoromethanesulfonate:** Prepared using 2.00 g (9.64 mmol) of 4-bromo-2-chlorophenol. The title product was obtained after purification by column chromatography (20:1 Pentane/EtOAc) as a colorless oil. 2.62 g (85%).  $R_f = 0.25$  (5:1 Pentane/EtOAc).  $^1\text{H NMR}$  (600 MHz,  $\text{CDCl}_3$ )  $\delta$  7.70 (d,  $J = 2.3$  Hz, 1H), 7.48 (dd,  $J = 8.8, 2.3$  Hz, 1H), 7.24 (d,  $J = 8.8$  Hz, 1H).  $^{13}\text{C NMR}$  (151 MHz,  $\text{CDCl}_3$ )  $\delta$  145.0, 134.1, 131.7, 128.7, 124.3, 122.2, 118.7 (q,  $J = 320.7$  Hz).  $^{19}\text{F NMR}$  (564 MHz,  $\text{CDCl}_3$ )  $\delta$  -73.29. MS (70eV, EI):  $m/z$  (%): 340 (22), 338 (16),  $[\text{M}^+]$ , 207 (100) 205 (75), 179 (53), 177 (42). These data are in agreement with those reported previously in the literature.<sup>[11]</sup>

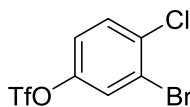

**3-Bromo-4-chlorophenyl trifluoromethanesulfonate:** Prepared using 900 mg (4.34 mmol) of 3-bromo-4-chlorophenol. The title product was obtained after purification by column chromatography (20:1 Hexane/EtOAc) as a colorless oil. 1038 mg (70%).  $R_f = 0.47$  (Hexane).  $^1\text{H NMR}$  (400 MHz,  $\text{CDCl}_3$ )  $\delta$  7.58 (d,  $J = 2.8$  Hz, 1H), 7.54 (d,  $J = 8.9$  Hz, 1H), 7.21 (dd,  $J = 8.9, 2.8$  Hz, 1H).  $^{13}\text{C NMR}$  (101 MHz,  $\text{CDCl}_3$ )  $\delta$  147.3, 135.1, 131.3, 126.7, 123.5, 121.5, 118.6 (q,  $J = 320.8$  Hz).  $^{19}\text{F NMR}$  (376 MHz,  $\text{CDCl}_3$ )  $\delta$  -72.65. HRMS (EI) calculated for  $\text{C}_7\text{H}_3\text{BrClF}_3\text{O}_3\text{S}$ : 337.8621  $[\text{M}^+]$ , found: 337.8619.

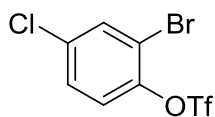

**2-Bromo-4-chlorophenyl trifluoromethanesulfonate:** Prepared using 1.00 g (4.82 mmol) of 2-bromo-4-chlorophenol. The title product was obtained after purification by column chromatography (20:1 Pentane/EtOAc) as a colorless oil. 1.49 g (90%).  $R_f = 0.25$  (5:1 Pentane/EtOAc).  $^1\text{H NMR}$  (600 MHz,  $\text{CDCl}_3$ )  $\delta$  7.69 (d,  $J = 2.4$  Hz, 1H), 7.37 (dd,  $J$

= 8.9, 2.4 Hz, 1H), 7.29 (d,  $J = 8.9$  Hz, 1H).  $^{13}\text{C}$  NMR (151 MHz,  $\text{CDCl}_3$ )  $\delta$  145.6, 134.7, 134.0, 129.2, 123.6, 118.6 (q,  $J = 320.6$  Hz), 116.8.  $^{19}\text{F}$  NMR (564 MHz,  $\text{CDCl}_3$ )  $\delta$  -73.31. HRMS (EI) calculated for  $\text{C}_7\text{H}_3\text{BrClF}_3\text{O}_3\text{S}$ : 337.8621 [ $\text{M}^+$ ], found 337.8621.

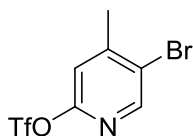

**5-Bromo-4methylpyridin-2ylenyl trifluoromethanesulfonate:** Prepared using 0.80 g (4.25 mmol) of 5-bromo-4-methylpyridin-2-ol. The title product was obtained after purification by column chromatography (20:1 Pentane/EtOAc) as a colorless oil. 1.32 g (94%).  $R_f = 0.27$  (2:1 Pentane/EtOAc).  $^1\text{H}$  NMR (600 MHz,  $\text{CDCl}_3$ )  $\delta$  8.42 (s, 1H), 7.08 (s, 1H), 2.48 (s, 3H).  $^{13}\text{C}$  NMR (151 MHz,  $\text{CDCl}_3$ )  $\delta$  154.9, 152.8, 149.8, 123.4, 118.7 (q,  $J = 320.6$  Hz), 117.1, 22.9.  $^{19}\text{F}$  NMR (564 MHz,  $\text{CDCl}_3$ )  $\delta$  -73.06 (s). HRMS (ESI) calculated for  $\text{C}_7\text{H}_5\text{O}_3\text{NBBrF}_3\text{SNa}$ : 341.9017 [ $\text{M}+\text{Na}$ ] $^+$ , found 341.9018.

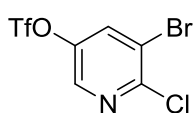

**3-Bromo-5-chloropyridin-2-yl trifluoromethanesulfonate:** Prepared using 0.50 g (2.40 mmol) of 5-bromo-6-chloropyridin-3-ol. The title product was obtained after purification by column chromatography (10:1 Hexane/EtOAc) as a light yellow oil. 660 mg (81%).  $R_f = 0.57$  (10:1 Hexane/EtOAc).  $^1\text{H}$  NMR (600 MHz,  $\text{CDCl}_3$ )  $\delta$  8.27 (d,  $J = 2.4$  Hz, 1H), 8.08 (d,  $J = 2.4$  Hz, 1H).  $^{13}\text{C}$  NMR (151 MHz,  $\text{CDCl}_3$ )  $\delta$  151.2, 145.5, 143.4, 132.3, 118.4 (q,  $J = 320.9$  Hz), 111.5.  $^{19}\text{F}$  NMR (564 MHz,  $\text{CDCl}_3$ )  $\delta$  -72.88. HRMS (EI) calculated for  $\text{C}_6\text{H}_2\text{BrClF}_3\text{NO}_3\text{S}$ : 338.8574 [ $\text{M}^+$ ], found: 338.8571.

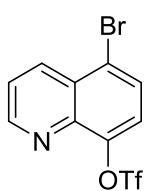

**5-Bromoquinolin-8-yl trifluoromethanesulfonate:** Prepared using 1.00 g (4.46 mmol) of 5-bromoquinolin-8-ol. The title product was obtained after purification by column chromatography (20:1 Pentane/EtOAc) as a white solid. 1.12 g (70%).  $R_f = 0.42$  (2:1 Pentane/EtOAc).  $^1\text{H}$  NMR (600 MHz,  $\text{CDCl}_3$ )  $\delta$  9.08 (dd,  $J = 4.2, 1.4$  Hz, 1H), 8.57 (dd,  $J = 8.6, 1.4$  Hz, 1H), 7.86 (d,  $J = 8.3$  Hz, 1H), 7.65 (dd,  $J = 8.6, 4.2$  Hz, 1H), 7.51 (d,  $J = 8.3$  Hz, 1H).  $^{13}\text{C}$  NMR (151 MHz,  $\text{CDCl}_3$ )  $\delta$  152.2, 145.6, 141.6, 135.7, 129.4, 129.0, 123.7, 121.8, 121.4, 118.8 (q,  $J = 320.4$  Hz).  $^{19}\text{F}$  NMR (564 MHz,  $\text{CDCl}_3$ )  $\delta$  -73.68 (s). HRMS (ESI) calculated for  $\text{C}_{10}\text{H}_5\text{O}_3\text{NBBrF}_3\text{SNa}$ : 377.9006 [ $\text{M}+\text{Na}$ ] $^+$ , found 377.9018. These data are in agreement with those reported previously in the literature.<sup>[12]</sup>

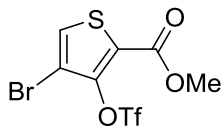

**Methyl 4-bromo-3-((trifluoromethyl)sulfonyl)oxy)-2-thiophenecarboxylate:** Prepared using 1.00 g (4.22 mmol) of methyl 4-bromo-3-hydroxythiophene-2-carboxylate. The title product was obtained after purification by column chromatography (20:1 Pentane/EtOAc) as a colorless oil. 1.30 g (83%).  $R_f = 0.18$  (5:1 Pentane/EtOAc).  $^1\text{H}$  NMR (600 MHz,  $\text{CDCl}_3$ )  $\delta$  7.55 (s, 1H), 3.93 (s, 3H).  $^{13}\text{C}$  NMR (151 MHz,  $\text{CDCl}_3$ )  $\delta$  159.5, 143.3, 128.17, 123.5, 118.5 (q,  $J = 320.9$  Hz), 106.5, 52.9.  $^{19}\text{F}$  NMR (564 MHz,  $\text{CDCl}_3$ )  $\delta$  -72.85. MS (70eV, EI):  $m/z$  (%): 370 (30), 368 (28), [ $\text{M}^+$ ], 275 (53), 273 (50), 237 (38), 235 (38), 181 (42), 179 (45). These data are in agreement with those reported previously in the literature.<sup>[13]</sup>

## 4.2. Characterization data of cross-coupling products

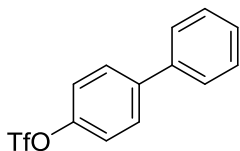

**4-Trifluoromethanesulfonyloxybiphenyl:** Prepared, following the Kumada cross-coupling procedure using 0.24 mmol of PhMgCl. The title product was obtained after purification by column chromatography (100% Pentane) as a white solid 49 mg (96%).  $R_f = 0.19$  (20:1 Pentane/EtOAc).  $^1\text{H NMR}$  (400 MHz,  $\text{CDCl}_3$ )  $\delta$  7.67 – 7.63 (m, 2H), 7.58–7.54 (m, 2H), 7.49–7.44 (m, 2H), 7.42–7.39 (m, 1H), 7.37–7.32 (m, 2H).  $^{13}\text{C NMR}$  (151 MHz,  $\text{CDCl}_3$ )  $\delta$  149.1, 141.8, 139.4, 129.1, 129.0, 128.2, 127.3, 121.8, 118.9 (q,  $J = 320.7$  Hz).  $^{19}\text{F NMR}$  (376 MHz,  $\text{CDCl}_3$ )  $\delta$  -72.81 (s). MS (70eV, EI):  $m/z$  (%): 302 (36) [ $\text{M}^+$ ], 169 (100) 141 (52) 115 (40), 69 (13). These data are in agreement with those reported previously in the literature.<sup>[14]</sup>

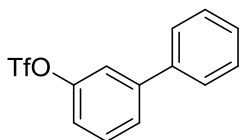

**3-Trifluoromethanesulfonyloxybiphenyl:** Prepared, following the Kumada cross-coupling procedure using 0.40 mmol of PhMgCl. The title product was obtained after purification by column chromatography (100% Pentane) as a colorless oil. 62 mg (85%).  $R_f = 0.18$  (20:1 Pentane/EtOAc).  $^1\text{H NMR}$  (600 MHz,  $\text{CDCl}_3$ )  $\delta$  7.64 – 7.61 (m, 1H), 7.58 (dd,  $J = 5.2, 3.3$  Hz, 2H), 7.52 (d,  $J = 8.0$  Hz, 1H), 7.50 – 7.46 (m, 3H), 7.44 – 7.40 (m, 1H), 7.28 – 7.25 (m, 1H).  $^{13}\text{C NMR}$  (151 MHz,  $\text{CDCl}_3$ )  $\delta$  150.0, 143.9, 139.0, 130.5, 129.0, 128.3, 127.2, 127.0, 120.0, 119.8, 118.8 (q,  $J = 320.4$  Hz).  $^{19}\text{F NMR}$  (376 MHz,  $\text{CDCl}_3$ )  $\delta$  -72.85 (s). HRMS (ESI) calculated for  $\text{C}_{13}\text{H}_9\text{O}_3\text{F}_3\text{SNa}$ : 325.0117 [ $\text{M}+\text{Na}$ ] $^+$ , found 325.0118.

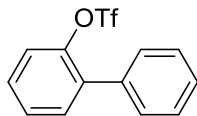

**2-Trifluoromethanesulfonyloxybiphenyl:** Prepared, following the Kumada cross-coupling procedure using 0.40 mmol of PhMgCl. The title product was obtained after purification by column chromatography (100% Pentane) as a colorless oil. 76 mg (93%).  $R_f = 0.20$  (20:1 Pentane/EtOAc).  $^1\text{H NMR}$  (400 MHz,  $\text{CDCl}_3$ )  $\delta$  7.50 – 7.37 (m, 9H).  $^{13}\text{C NMR}$  (151 MHz,  $\text{CDCl}_3$ )  $\delta$  146.9, 135.7, 132.1, 130.0, 129.5, 129.1, 128.6, 128.5, 128.0, 122.2, 118.5 (q,  $J = 320.6$  Hz).  $^{19}\text{F NMR}$  (376 MHz,  $\text{CDCl}_3$ )  $\delta$  -74.12 (s). MS (70eV, EI):  $m/z$  (%): 302 (36) [ $\text{M}^+$ ], 169 (100) 141 (35) 115 (34), 69 (9). These data are in agreement with those reported previously in the literature.<sup>[15]</sup>

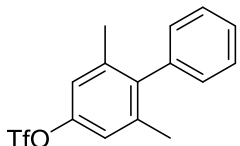

**2,6-Dimethyl-1,1'-biphen-4-yl trifluoromethanesulfonate:** Prepared, following the Kumada cross-coupling procedure using 0.36 mmol of PhMgCl. The title product was obtained after purification by column chromatography (100% Pentane) as a colorless oil. 68 mg (86 %).  $R_f = 0.26$  (20:1 Pentane/EtOAc).  $^1\text{H NMR}$  (600 MHz,  $\text{CDCl}_3$ )  $\delta$  7.46 – 7.43 (m, 2H), 7.39 – 7.37 (m, 1H), 7.12 – 7.09 (m, 2H), 7.01 (s, 2H), 2.05 (s, 6H).  $^{13}\text{C NMR}$  (151 MHz,  $\text{CDCl}_3$ )  $\delta$  148.1, 142.1, 139.3, 138.9, 128.72, 128.70, 127.2, 119.6, 118.9 (q,  $J = 320.6$  Hz), 21.0.  $^{19}\text{F NMR}$  (564 MHz,  $\text{CDCl}_3$ )  $\delta$  -73.04. HRMS (EI) calculated for  $\text{C}_{15}\text{H}_{13}\text{O}_3\text{F}_3\text{SNa}$ : 353.0430 [ $\text{M}^+$ ], found 353.0430.

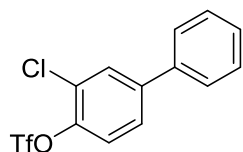

**3-Chloro-1,1'-biphen-4-yl trifluoromethanesulfonate:** Prepared, following the Kumada cross-coupling procedure using 0.48 mmol of PhMgCl. The title product was obtained after purification by column chromatography (100% Pentane) as a colorless oil. 54 mg (84 %).  $R_f = 0.22$  (20:1 Pentane/EtOAc).  $^1\text{H NMR}$  (600 MHz,  $\text{CDCl}_3$ )  $\delta$  7.73 (d,  $J = 2.2$  Hz, 1H), 7.57 – 7.52 (m, 3H), 7.50 – 7.45 (m, 2H), 7.44 – 7.40 (m, 2H).  $^{13}\text{C NMR}$  (151 MHz,  $\text{CDCl}_3$ )  $\delta$  144.8, 142.8, 138.1, 129.7, 129.1, 128.6, 127.4, 127.1, 126.8, 123.1, 118.6 (q,  $J = 320.7$  Hz).  $^{19}\text{F NMR}$  (564 MHz,  $\text{CDCl}_3$ )  $\delta$  -73.36. HRMS (EI) calculated for  $\text{C}_{13}\text{H}_8\text{O}_3\text{F}_3\text{SCl}$ : 335.9829 [ $\text{M}^+$ ], found 335.9825.

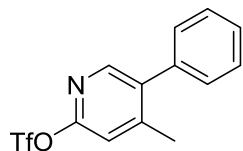

**3-Chloro-1,1'-biphen-4-yl trifluoromethanesulfonate:** Prepared, following the Kumada cross-coupling procedure using 0.47 mmol of PhMgCl. The title product was obtained after purification by column chromatography (20:1 Pentane/EtOAc) as a colorless oil. 51 mg (86%).  $R_f = 0.22$  (10:1 Pentane/EtOAc).  $^1\text{H NMR}$  (600 MHz,  $\text{CDCl}_3$ )  $\delta$  8.20 (s, 1H), 7.50 – 7.42 (m, 3H), 7.31 – 7.28 (m, 2H), 7.09 (s, 1H), 2.36 (s, 3H).  $^{13}\text{C NMR}$  (151 MHz,  $\text{CDCl}_3$ )  $\delta$  155.0, 150.7, 148.3, 138.8, 136.0, 129.1, 128.7, 128.3, 118.6 (q,  $J = 320.5$  Hz), 115.9, 20.4.  $^{19}\text{F NMR}$  (564 MHz,  $\text{CDCl}_3$ )  $\delta$  -73.20 (s). HRMS (ESI) calculated for  $\text{C}_{13}\text{H}_{10}\text{O}_3\text{NF}_3\text{SNa}$ : 340.0218 [ $\text{M}+\text{Na}$ ] $^+$ , found 340.0226.

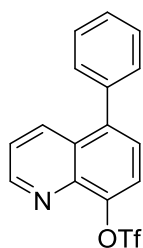

**5-Phenyl-8-trifluoromethylsulfonyloxy quinoline:** Prepared, following the Kumada cross-coupling procedure using 0.40 mmol of PhMgCl. The title product was obtained after purification by column chromatography (20:1 Pentane/EtOAc) as a light yellow oil. 61 mg (86 %).  $R_f = 0.22$  (10:1 Pentane/EtOAc). M.p. 99 - 102 °C.  $^1\text{H NMR}$  (400 MHz,  $\text{CDCl}_3$ )  $\delta$  9.06 (dd,  $J = 4.1, 1.6$  Hz, 1H), 8.26 (dd,  $J = 8.6, 1.6$  Hz, 1H), 7.67 (d,  $J = 7.9$  Hz, 1H), 7.57 – 7.47 (m, 5H), 7.46 – 7.43 (m, 2H).  $^{13}\text{C NMR}$  (151 MHz,  $\text{CDCl}_3$ )  $\delta$  151.3, 145.3, 141.23, 141.15, 138.0, 134.5, 129.9, 128.7, 128.3, 128.1, 126.3, 122.5, 120.4, 118.9 (q,  $J = 320.4$  Hz), 115.2.  $^{19}\text{F NMR}$  (564 MHz,  $\text{CDCl}_3$ )  $\delta$  -73.81. HRMS (ESI) calculated for  $\text{C}_{16}\text{H}_{10}\text{O}_3\text{NF}_3\text{SNa}$ : 376.0226 [ $\text{M}+\text{Na}$ ] $^+$ , found 376.0226.

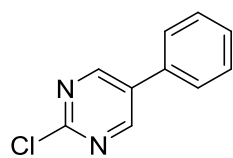

**2-Chloro-5-phenylpyrimidine:** Prepared, following the Kumada cross-coupling procedure using 0.39 mmol of PhMgCl. The title product was obtained after purification by preparative HPLC (9:1 Pentane/EtOAc) as a white solid. 36 mg (95 %).  $R_f = 0.18$  (10:1 Pentane/EtOAc).  $^1\text{H NMR}$  (600 MHz,  $\text{CDCl}_3$ )  $\delta$  8.83 (s, 2H), 7.59–7.48 (m, 5H).  $^{13}\text{C NMR}$  (151 MHz,  $\text{CDCl}_3$ )  $\delta$  160.3, 157.6, 133.2, 133.1, 129.7, 129.5, 127.1. MS (70eV, EI):  $m/z$  (%): 192 (33), 190 (100), [ $\text{M}^+$ ], 155 (14) 128 (9), 102 (55). These data are in agreement with those reported previously in the literature.<sup>[16]</sup>

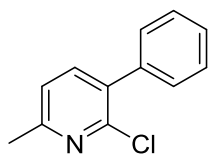

**6-Chloro-5-phenyl-2-methylpyridine:** Prepared, following the Kumada cross-coupling procedure using 0.29 mmol of PhMgCl. The title product was obtained after purification by column chromatography (20:1 Pentane/EtOAc) as a dark yellow oil. 38 mg (96 %).  $R_f = 0.18$  (10:1 Pentane/EtOAc).  $^1\text{H NMR}$  (600 MHz,  $\text{CDCl}_3$ )  $\delta$  7.56 (d,  $J = 7.7$  Hz, 1H), 7.47 – 7.38 (m, 5H), 7.15 (d,  $J = 7.7$  Hz, 1H), 2.59 (s, 3H).  $^{13}\text{C NMR}$  (151 MHz,  $\text{CDCl}_3$ )  $\delta$  158.2, 148.7, 140.1, 137.7, 133.9, 129.5, 128.4, 128.2, 122.3, 24.0. HRMS (EI) calculated for  $\text{C}_{12}\text{H}_{10}\text{NCl}$ : 203.0496 [ $\text{M}^+$ ], found 203.0495.

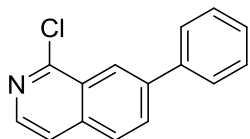

**1-Chloro-4-phenylisoquinoline:** Prepared, following the Kumada cross-coupling procedure using 0.30 mmol of PhMgCl. The title product was obtained after purification by column chromatography (20:1 Pentane/EtOAc) as a yellow oil. 38 mg (95 %).  $R_f = 0.27$  (10:1 Pentane/EtOAc).  $^1\text{H NMR}$  (400 MHz,  $\text{CDCl}_3$ )  $\delta$  8.52 – 8.51 (m, 1H), 8.28 (d,  $J = 5.6$  Hz, 1H), 8.02 (dd,  $J = 8.5, 1.8$  Hz, 1H), 7.92 (d,  $J = 8.5$  Hz, 1H), 7.76 – 7.71 (m, 2H), 7.63 (d,  $J = 5.6$  Hz, 1H), 7.56 – 7.50 (m, 2H), 7.47 – 7.42 (m, 1H).  $^{13}\text{C NMR}$  (151 MHz,  $\text{CDCl}_3$ )  $\delta$  151.7, 141.5, 141.4, 139.9, 136.8, 130.9, 129.1, 128.2, 127.5, 127.3, 124.1, 120.5. HRMS (ESI) calculated for  $\text{C}_{15}\text{H}_{11}\text{NCl}$ : 240.0574  $[\text{M}+\text{H}]^+$ , found 240.0575.

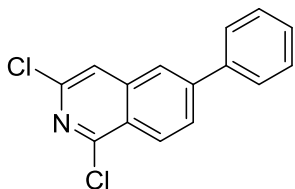

**1,3-Dichloro-6-phenylisoquinoline:** Prepared, following the Kumada cross-coupling procedure using 0.30 mmol of PhMgCl. The title product was obtained after purification by column chromatography (20:1 Pentane/EtOAc) as a white solid. 50 mg (92 %).  $R_f = 0.30$  (10:1 Pentane/EtOAc). M.p. 103 - 107 °C.  $^1\text{H NMR}$  (600 MHz,  $\text{CDCl}_3$ )  $\delta$  8.34 (d,  $J = 9.1$  Hz, 1H), 7.97 – 7.88 (m, 2H), 7.75 – 7.64 (m, 3H), 7.56 – 7.50 (m, 2H), 7.48 – 7.42 (m, 1H).  $^{13}\text{C NMR}$  (151 MHz,  $\text{CDCl}_3$ )  $\delta$  151.0, 145.1, 143.7, 139.8, 139.2, 129.3, 129.0, 128.8, 127.7, 127.3, 124.9, 123.9, 120.0. HRMS (EI) calculated for  $\text{C}_{15}\text{H}_9\text{NCl}_2$ : 273.0113  $[\text{M}^+]$ , found 273.0107.

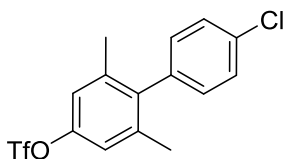

**4'-Chloro-2,6-dimethyl-[1,1'-biphenyl]-4-yl trifluoromethanesulfonate:** Prepared, following the Kumada cross-coupling procedure using 0.57 mmol of (*p*-Chloro)PhMgBr. The title product was obtained after purification by column chromatography (100:1 Pentane/EtOAc) as a colorless oil. 64 mg (92 %).  $R_f = 0.27$  (10:1 Pentane/EtOAc).  $^1\text{H NMR}$  (600 MHz,  $\text{CDCl}_3$ )  $\delta$  7.44 (d,  $J = 8.5$  Hz, 2H), 7.06 (d,  $J = 8.5$  Hz, 2H), 7.02 (s, 2H), 2.05 (s, 6H).  $^{13}\text{C NMR}$  (151 MHz,  $\text{CDCl}_3$ )  $\delta$  148.3, 140.8, 138.9, 137.7, 133.3, 130.2, 129.0, 119.8, 118.7 (q,  $J = 320.8$  Hz), 21.0.  $^{19}\text{F NMR}$  (564 MHz,  $\text{CDCl}_3$ )  $\delta$  -73.04 (s). HRMS (EI) calculated for  $\text{C}_{15}\text{H}_{12}\text{O}_3\text{ClF}_3\text{S}$ : 364.0142  $[\text{M}^+]$ , found 364.0144.

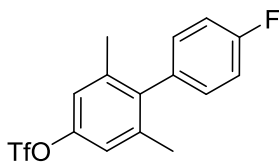

**4'-Fluoro-2,6-dimethyl-[1,1'-biphenyl]-4-yl trifluoromethanesulfonate:** Prepared, following the Kumada cross-coupling procedure using 0.57 mmol of (*p*-Fluoro)PhMgBr. The title product was obtained after purification by column chromatography (100:1 Pentane/EtOAc) as a colorless oil. 55 mg (94 %).  $R_f = 0.29$  (10:1 Pentane/EtOAc).  $^1\text{H NMR}$  (600 MHz,  $\text{CDCl}_3$ )  $\delta$  7.15 (d,  $J = 8.7$  Hz, 2H), 7.08 (d,  $J = 8.7$  Hz, 2H), 7.01 (s, 2H), 2.05 (s, 6H).  $^{13}\text{C NMR}$  (151 MHz,  $\text{CDCl}_3$ )  $\delta$  162.0 (d,  $J_{\text{C-F}} = 246.5$  Hz), 161.2, 148.2, 141.0, 139.1, 135.1 (d,  $J_{\text{C-F}} = 3.2$  Hz), 130.4 (d,  $J_{\text{C-F}} = 7.9$  Hz, 2C), 119.7, 118.7 (q,  $J = 320.5$  Hz), 115.8 (d,  $J_{\text{C-F}} = 21.4$  Hz, 2C), 21.0.  $^{19}\text{F NMR}$  (564 MHz,  $\text{CDCl}_3$ )  $\delta$  -73.05 (s, 3F), -115.09 (m, 1F). HRMS (EI) calculated for  $\text{C}_{15}\text{H}_{12}\text{O}_3\text{F}_4\text{S}$ : 348.0438  $[\text{M}^+]$ , found 348.0435.



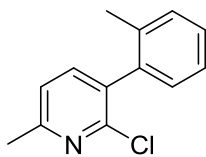

**2-Chloro-6-methyl-3-(2-methylphenyl)pyridine:** Prepared, following the Negishi cross-coupling procedure using 0.52 mmol of *o*-tolyl-MgCl and 0.56 mmol of ZnCl<sub>2</sub>. The title product was obtained after purification by column chromatography (100:1 → 20:1 Hexane/EtOAc) as an orange oil. 79 mg (91%). R<sub>f</sub> = 0.26 (20:1 Hexane/EtOAc). <sup>1</sup>H NMR (400 MHz, CDCl<sub>3</sub>) δ 7.46 (d, *J* = 7.6 Hz, 1H), 7.37 – 7.21 (m, 3H), 7.20 – 7.08 (m, 2H), 2.60 (s, 3H), 2.14 (s, 3H). <sup>13</sup>C NMR (101 MHz, CDCl<sub>3</sub>) δ 158.2, 149.4, 139.8, 137.3, 136.2, 133.6, 130.0, 129.4, 128.3, 125.7, 121.8, 23.9, 19.8. HRMS (ESI) calculated for C<sub>13</sub>H<sub>13</sub>ClN: 218.0731 [M+H]<sup>+</sup>, found: 218.0728.

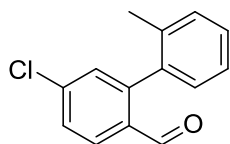

**4-Chloro-2-(2-methylphenyl)benzaldehyde:** Prepared, following the Negishi cross-coupling procedure using 0.52 mmol of *o*-tolyl-MgCl and 0.56 mmol of ZnCl<sub>2</sub>. The title product was obtained after purification by column chromatography (100:1 → 50:1 → 30:1 Hexane/EtOAc) as a dark yellow oil. 64 mg (70%). R<sub>f</sub> = 0.70 (5:1 Hexane/EtOAc). <sup>1</sup>H NMR (600 MHz, CDCl<sub>3</sub>) δ 9.68 (s, 1H), 7.97 (d, *J* = 8.4 Hz, 1H), 7.48 (dd, *J* = 8.4, 2.1 Hz, 1H), 7.37 – 7.34 (m, 1H), 7.32 (d, *J* = 2.1 Hz, 1H), 7.31 – 7.26 (m, 2H), 7.18 (d, *J* = 7.5 Hz, 1H), 2.12 (s, 3H). <sup>13</sup>C NMR (151 MHz, CDCl<sub>3</sub>) δ 191.0, 147.0, 140.0, 136.0, 136.0, 132.2, 130.7, 130.2, 129.9, 128.7, 128.6, 128.3, 125.8, 20.2. HRMS (ESI) calculated for C<sub>14</sub>H<sub>11</sub>ClONa: 253.0391 [M+Na]<sup>+</sup>, found: 253.0389.

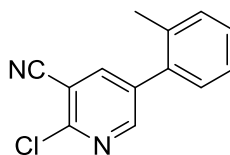

**2-Chloro-3-cyano-5-(2-methylphenyl)pyridine:** The title product was obtained after purification by column chromatography (100:1 → 20:1 Hexane/EtOAc; 100% DCM) as a white solid. 65 mg (71%). R<sub>f</sub> = 0.19 (20:1 Hexane/EtOAc). M.p. 132 - 134 °C. <sup>1</sup>H NMR (400 MHz, CDCl<sub>3</sub>) δ 8.56 (d, *J* = 2.4 Hz, 1H), 7.96 (d, *J* = 2.4 Hz, 1H), 7.40 – 7.29 (m, 3H), 7.18 (m, 1H), 2.28 (s, 3H). <sup>13</sup>C NMR (101 MHz, CDCl<sub>3</sub>) δ 152.8, 151.0, 142.6, 136.6, 135.4, 134.4, 131.0, 129.6, 129.4, 126.6, 114.6, 110.3, 20.2. HRMS (ESI) calculated for C<sub>13</sub>H<sub>9</sub>ClN<sub>2</sub>Na: 251.0347 [M+Na]<sup>+</sup>, found: 251.0337.

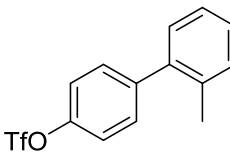

**2'-Methyl-[1,1'-biphenyl]-4-yl trifluoromethanesulfonate:** Prepared, following the Negishi cross-coupling procedure. The title product was obtained after purification by column chromatography (30:1 Hexane/EtOAc) as a colorless oil. 122 mg (97%). R<sub>f</sub> = 0.13 (Hexane). <sup>1</sup>H NMR (400 MHz, CDCl<sub>3</sub>) δ 7.40 (d, *J* = 8.9 Hz, 2H), 7.36 – 7.24 (m, 5H), 7.21 (d, *J* = 7.2 Hz, 1H), 2.27 (s, 3H). <sup>13</sup>C NMR (101 MHz, CDCl<sub>3</sub>) δ 148.5, 142.4, 139.9, 135.2, 131.0, 130.5, 129.6, 127.9, 126.0, 121.0, 118.8 (d, *J* = 320.8 Hz), 20.3. <sup>19</sup>F NMR (376 MHz, CDCl<sub>3</sub>) δ -72.88. MS (70eV, EI): *m/z* (%): 316 (60) [M<sup>+</sup>], 183 (100), 153 (24), 128 (15), 69 (10). These data are in agreement with those reported previously in the literature.<sup>[17]</sup>

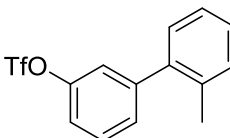

**2'-Methyl-[1,1'-biphenyl]-3-yl trifluoromethanesulfonate:** Prepared, following the Negishi cross-coupling procedure. The title product was obtained after purification by column chromatography (100:1 Hexane/EtOAc) as a colorless oil. 119 mg (94%). R<sub>f</sub> = 0.19 (Hexane). <sup>1</sup>H NMR (400 MHz, CDCl<sub>3</sub>) δ 7.56 – 7.46 (m, 1H), 7.37 (dd, *J* = 7.7, 1.3 Hz, 1H), 7.35 – 7.24 (m, 5H), 7.22 (d, *J* = 7.2 Hz, 1H), 2.28 (s, 3H). <sup>13</sup>C NMR (101 MHz, CDCl<sub>3</sub>) δ 149.3, 144.5, 139.6, 135.2, 130.6, 129.9, 129.6, 129.2, 128.1, 126.0, 122.1, 119.6, 118.8 (q, *J* = 320.8 Hz), 20.2. <sup>19</sup>F NMR (376 MHz, CDCl<sub>3</sub>) δ -72.86. HRMS (ESI) calculated for C<sub>14</sub>H<sub>11</sub>F<sub>3</sub>O<sub>3</sub>SNa: 339.0273 [M+Na]<sup>+</sup>, found: 339.0262.

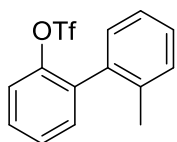

**2'-Methyl-[1,1'-biphenyl]-2-yl trifluoromethanesulfonate:** Prepared, following the Negishi cross-coupling procedure. The title product was obtained after purification by column chromatography (100:1 Hexane/EtOAc) as a colorless oil. 119 mg (94%).  $R_f = 0.21$  (Hexane).  $^1\text{H NMR}$  (400 MHz,  $\text{CDCl}_3$ )  $\delta$  7.49 – 7.42 (m, 1H), 7.41 – 7.35 (m, 2H), 7.37 – 7.23 (m, 3H), 7.22 (m, 1H), 2.18 (s, 3H).  $^{13}\text{C NMR}$  (101 MHz,  $\text{CDCl}_3$ )  $\delta$  147.0, 136.4, 135.5, 134.9, 132.3, 130.3, 130.1, 129.1, 128.6, 128.2, 125.6, 121.6, 118.3 (q,  $J = 320.4$  Hz), 19.8.  $^{19}\text{F NMR}$  (376 MHz,  $\text{CDCl}_3$ )  $\delta$  -74.42. HRMS (ESI) calculated for  $\text{C}_{14}\text{H}_{11}\text{F}_3\text{O}_3\text{SNa}$ : 339.0273  $[\text{M}+\text{Na}]^+$ , found: 339.0265.

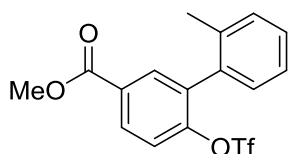

**Methyl 2'-methyl-6-(trifluoromethylsulfonyloxy)-[1,1'-biphenyl]-3-carboxylate:** Prepared, following the Negishi cross-coupling procedure. The title product was obtained after purification by column chromatography (Hexane  $\rightarrow$  100:1  $\rightarrow$  20:1 Hexane/EtOAc) as a orange oil. 135 mg (91%).  $R_f = 0.25$  (20:1 Hexane/EtOAc).  $^1\text{H NMR}$  (400 MHz,  $\text{CDCl}_3$ )  $\delta$  8.14 (dd,  $J = 8.6, 2.2$  Hz, 1H), 8.09 (d,  $J = 2.2$  Hz, 1H), 7.46 (d,  $J = 8.6$  Hz, 1H), 7.40 – 7.25 (m, 3H), 7.21 (m, 1H), 3.94 (s, 3H), 2.16 (s, 3H).  $^{13}\text{C NMR}$  (101 MHz,  $\text{CDCl}_3$ )  $\delta$  165.5, 149.9, 136.3, 135.7, 134.0, 133.7, 130.5, 130.2, 130.2, 130.2, 128.9, 125.8, 121.8, 118.2 (q,  $J = 320.5$  Hz), 52.5, 19.7.  $^{19}\text{F NMR}$  (376 MHz,  $\text{CDCl}_3$ )  $\delta$  -74.25. HRMS (ESI) calculated for  $\text{C}_{16}\text{H}_{14}\text{F}_3\text{O}_5\text{S}$ : 375.0509  $[\text{M}+\text{H}]^+$ , found: 375.0493.

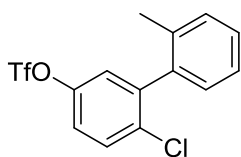

**4-Chloro-3-(2-methylphenyl)phenyl trifluoromethanesulfonate:** Prepared, following the Negishi cross-coupling procedure. The title product was obtained after purification by column chromatography (50:1 Hexane/EtOAc) as a colorless oil. 129 mg (92%).  $R_f = 0.16$  (Hexane).  $^1\text{H NMR}$  (400 MHz,  $\text{CDCl}_3$ )  $\delta$  7.56 (d,  $J = 8.8$  Hz, 1H), 7.40 – 7.23 (m, 4H), 7.20 (d,  $J = 2.9$  Hz, 1H), 7.14 (d,  $J = 7.5$  Hz, 1H), 2.13 (s, 3H).  $^{13}\text{C NMR}$  (101 MHz,  $\text{CDCl}_3$ )  $\delta$  147.6, 142.8, 137.4, 135.9, 133.6, 131.0, 130.1, 129.1, 128.7, 125.8, 123.9, 121.4, 118.7 (q,  $J = 321.0$  Hz), 19.6.  $^{19}\text{F NMR}$  (376 MHz,  $\text{CDCl}_3$ )  $\delta$  -72.68. HRMS (EI) calculated for  $\text{C}_{14}\text{H}_{10}\text{ClF}_3\text{O}_3\text{S}$ : 349.9986  $[\text{M}^+]$ , found: 349.9981.

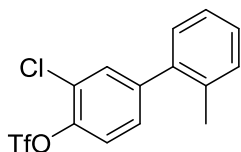

**2-Chloro-4-(2-methylphenyl)phenyl trifluoromethanesulfonate:** Prepared, following the Negishi cross-coupling procedure. The title product was obtained after purification by column chromatography (100:1 Hexane/EtOAc) as a colorless oil. 133 mg (95%).  $R_f = 0.21$  (Hexane).  $^1\text{H NMR}$  (400 MHz,  $\text{CDCl}_3$ )  $\delta$  7.43 (dd,  $J = 8.8, 2.6$  Hz, 1H), 7.38 (d,  $J = 2.6$  Hz, 1H), 7.30 (m, 4H), 7.19 (m, 1H), 2.18 (s, 3H).  $^{13}\text{C NMR}$  (101 MHz,  $\text{CDCl}_3$ )  $\delta$  145.4, 137.2, 136.3, 133.9, 133.7, 132.1, 130.2, 130.1, 129.1, 129.0, 125.8, 122.9, 118.2 (q,  $J = 320.4$  Hz), 19.7.  $^{19}\text{F NMR}$  (376 MHz,  $\text{CDCl}_3$ )  $\delta$  -74.24. HRMS (EI) calculated for  $\text{C}_{14}\text{H}_{10}\text{ClF}_3\text{O}_3\text{S}$ : 349.9986  $[\text{M}^+]$ , found: 349.9989.

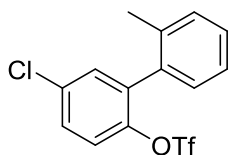

**4-Chloro-2-(2-methylphenyl)phenyl trifluoromethanesulfonate:** Prepared, following the Negishi cross-coupling procedure. The title product was obtained after purification by column chromatography (50:1 Hexane/EtOAc) as a colorless oil. 137 mg (98%).  $R_f = 0.16$  (Hexane).  $^1\text{H NMR}$  (400 MHz,  $\text{CDCl}_3$ )  $\delta$  7.50 (d,  $J = 2.1$  Hz, 1H), 7.41 (d,  $J = 8.5$  Hz, 1H), 7.34 – 7.27 (m, 4H), 7.20 (m, 1H), 2.28 (s, 3H).  $^{13}\text{C NMR}$  (101 MHz,  $\text{CDCl}_3$ )  $\delta$  144.5, 143.5, 138.7, 135.1, 131.8, 130.6, 129.5, 129.1, 128.4, 126.8, 126.1, 122.5, 118.6 (q,  $J = 320.6$  Hz), 20.3.  $^{19}\text{F NMR}$  (376 MHz,  $\text{CDCl}_3$ )  $\delta$  -73.43. HRMS (EI) calculated for  $\text{C}_{14}\text{H}_{10}\text{ClF}_3\text{O}_3\text{S}$ : 349.9986  $[\text{M}^+]$ , found: 349.9990.

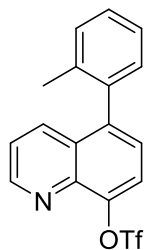

**5-(2-Methylphenyl)quinolin-8-yl trifluoromethanesulfonate:** Prepared, following the Negishi cross-coupling procedure using 0.44 mmol of *o*-tolyl-MgCl and 0.48 mmol of ZnCl<sub>2</sub>. The title product was obtained after purification by column chromatography (20:1 → 10:1 Hexane/EtOAc) as an orange oil. 114 mg (78%). R<sub>f</sub> = 0.40 (5:1 Hexane/EtOAc). <sup>1</sup>H NMR (400 MHz, CDCl<sub>3</sub>) δ 9.05 (dd, *J* = 4.2, 1.7 Hz, 1H), 7.83 (dd, *J* = 8.6, 1.7 Hz, 1H), 7.67 (d, *J* = 7.9 Hz, 1H), 7.46 – 7.30 (m, 5H), 7.21 (m, 1H), 2.01 (s, 3H). <sup>13</sup>C NMR (101 MHz, CDCl<sub>3</sub>) δ 151.4, 145.3, 141.0, 140.8, 137.3, 136.5, 134.5, 130.3, 130.2, 128.6, 128.5, 126.3, 125.9, 122.5, 120.4, 118.9 (q, *J* = 320.8 Hz), 20.1. <sup>19</sup>F NMR (376 MHz, CDCl<sub>3</sub>) δ -73.81. HRMS (ESI) calculated for C<sub>17</sub>H<sub>13</sub>F<sub>3</sub>NO<sub>3</sub>S: 368.0563 [M+H]<sup>+</sup>, found: 368.0549.

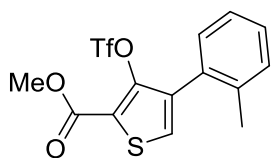

**Methyl 4-(2-methylphenyl)-3-(trifluoromethylsulfonyloxy)thiophene-2-carboxylate:** Prepared, following the Negishi cross-coupling procedure. The title product was obtained after purification by column chromatography (50:1 Hexane/EtOAc) as a white solid. 125 mg (82%). R<sub>f</sub> = 0.37 (10:1 Hexane/EtOAc). M.p. 81 - 83 °C. <sup>1</sup>H NMR (400 MHz, CDCl<sub>3</sub>) δ 7.43 (s, 1H), 7.36 – 7.27 (m, 2H), 7.25 – 7.18 (m, 2H), 3.96 (s, 3H), 2.24 (s, 3H). <sup>13</sup>C NMR (101 MHz, CDCl<sub>3</sub>) δ 160.3, 143.4, 136.8, 136.7, 131.0, 130.6, 130.3, 129.1, 128.2, 125.8, 122.9, 117.9 (q, *J* = 320.9 Hz), 52.5, 19.8. <sup>19</sup>F NMR (376 MHz, CDCl<sub>3</sub>) δ -74.50. HRMS (ESI) calculated for C<sub>14</sub>H<sub>11</sub>F<sub>3</sub>O<sub>5</sub>S<sub>2</sub>Na: 402.9892 [M+Na]<sup>+</sup>, found: 402.9872.

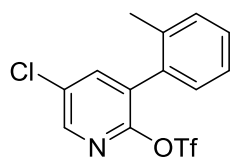

**5-Chloro-3-(2-methylphenyl)pyridin-2-yl trifluoromethanesulfonate:** Prepared, following the Negishi cross-coupling procedure. The title product was obtained after purification by column chromatography (50:1 Hexane/EtOAc) as a colorless oil. 127 mg (91%). R<sub>f</sub> = 0.39 (20:1 Hexane/EtOAc). <sup>1</sup>H NMR (400 MHz, CDCl<sub>3</sub>) δ 8.35 (d, *J* = 2.6 Hz, 1H), 7.77 (d, *J* = 2.6 Hz, 1H), 7.44 – 7.27 (m, 3H), 7.17 (d, *J* = 7.5 Hz, 1H), 2.18 (s, 3H). <sup>13</sup>C NMR (101 MHz, CDCl<sub>3</sub>) δ 151.5, 145.9, 141.5, 136.1, 131.9, 131.8, 130.6, 130.5, 129.7, 129.6, 126.1, 118.2 (q, *J* = 320.6 Hz), 19.7. <sup>19</sup>F NMR (376 MHz, CDCl<sub>3</sub>) δ -73.70. HRMS (ESI) calculated for C<sub>13</sub>H<sub>10</sub>ClF<sub>3</sub>NO<sub>3</sub>S: 352.0017 [M+H]<sup>+</sup>, found: 352.0008.

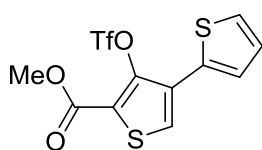

**Methyl 4'-(trifluoromethylsulfonyloxy)-[2,3'-bithiophene]-5'-carboxylate:** Prepared, following the Negishi cross-coupling procedure using 0.6 mmol of (2-thienyl)MgBr and 0.64 mmol of ZnCl<sub>2</sub>. The title product was obtained after purification by column chromatography (50:1 → 20:1 → 10:1 Hexane/EtOAc) as a light orange solid. 128 mg (86%). R<sub>f</sub> = 0.31 (10:1 Hexane/EtOAc). M.p. 83 - 85 °C. <sup>1</sup>H NMR (400 MHz, CDCl<sub>3</sub>) δ 7.53 (s, 1H), 7.39 (dd, *J* = 5.1, 1.1 Hz, 1H), 7.23 (dd, *J* = 3.6, 0.9 Hz, 2H), 7.11 (dd, *J* = 5.1, 3.6 Hz, 1H), 3.96 (s, 3H). <sup>13</sup>C NMR (101 MHz, CDCl<sub>3</sub>) δ 160.2, 142.4, 132.2, 130.0, 127.8, 127.0, 126.7, 123.9, 118.1 (q, *J* = 320.9 Hz), 52.6. <sup>19</sup>F NMR (376 MHz, CDCl<sub>3</sub>) δ -74.38. HRMS (ESI) calculated for C<sub>11</sub>H<sub>7</sub>O<sub>5</sub>F<sub>3</sub>S<sub>3</sub>: 371.9402 [M]<sup>+</sup>, found: 371.9403.

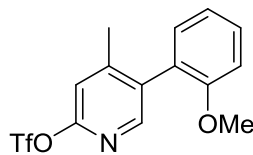

**5-(2-methoxyphenyl)-4-methylpyridin-2-yl trifluoromethanesulfonate:** Prepared, following the Negishi cross-coupling procedure using 0.8 mmol of (2-methoxyphenyl)MgBr and 0.88 mmol of ZnCl<sub>2</sub>. The title product was obtained after purification by column chromatography (50:1 → 20:1 → 10:1 Hexane/EtOAc) as a yellow oil. 119 mg (86%). R<sub>f</sub> = 0.29 (10:1 Hexane/EtOAc). <sup>1</sup>H NMR (400 MHz, CDCl<sub>3</sub>) δ 8.13 (s, 1H), 7.47 – 7.38 (m, 1H), 7.18 – 7.11 (m, 1H), 7.09 – 7.03 (m, 2H), 7.00 (d, *J* = 8.3 Hz, 1H), 3.78 (s, 3H), 2.23 (s, 3H). <sup>13</sup>C NMR (101 MHz, CDCl<sub>3</sub>) δ 156.7, 155.1, 152.3, 148.6, 135.9, 130.9, 130.1, 124.8, 120.8, 118.6 (q, *J* = 320.5 Hz), 115.2, 110.8, 55.3, 19.9. <sup>19</sup>F NMR (376 MHz, CDCl<sub>3</sub>) δ -73.30. HRMS (ESI) calculated for C<sub>14</sub>H<sub>12</sub>O<sub>4</sub>NF<sub>3</sub>S: 347.0434 [M]<sup>+</sup>, found: 347.0431.

## 5. Computational details

All calculations were performed using Gaussian 09 software.<sup>[18]</sup> Structural optimizations and frequency calculations were performed with  $\omega$ B97XD method along with 6-31G(d) basis set and the SDD ECP on Pd. Single point energy calculations were performed with M06 and def2-TZVP basis set. Solvent effects of toluene were included using the CPCM solvation model. Frequency calculations were performed to confirm whether the structure is a minimum or a transition state and IRC calculations were performed to confirm whether the located transition state connect the correct minima.

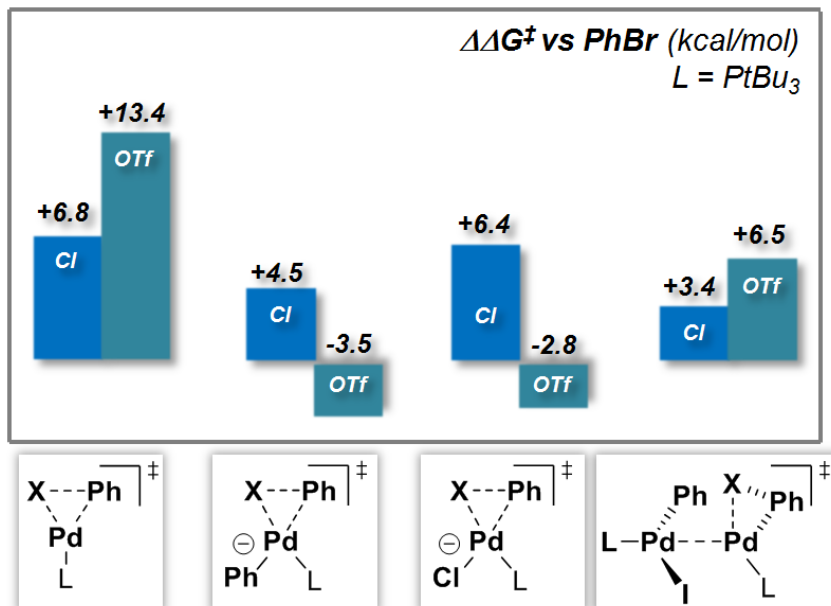

**Figure S3.** Comparison of C-Br vs C-Cl vs C-OTf oxidative addition selectivity with PtBu<sub>3</sub>-ligated Pd<sup>(0)</sup> and Pd<sup>(I)</sup> complexes. Calculated at the CPCM (Toluene) M06/def2-TZVP //  $\omega$ B97XD/6-31G(d) SDD level of theory.

### Cartesian coordinates of computed structures

|    |                 |                 |                 |
|----|-----------------|-----------------|-----------------|
| P  | 1.628069000000  | 0.157364000000  | -0.004865000000 |
| Pd | -0.736227000000 | -0.041726000000 | -0.029110000000 |
| C  | -2.733483000000 | 0.093138000000  | -0.009290000000 |
| Br | -2.251556000000 | -2.084967000000 | 0.000282000000  |
| C  | -3.172870000000 | 0.618221000000  | 1.215404000000  |
| C  | -3.199207000000 | 0.607233000000  | -1.228572000000 |
| C  | -4.023964000000 | 1.720380000000  | 1.205725000000  |
| C  | 2.179176000000  | 1.706636000000  | -0.991070000000 |
| C  | 2.231028000000  | 0.338398000000  | 1.806060000000  |
| C  | 2.456276000000  | -1.389373000000 | -0.776696000000 |
| C  | -4.462883000000 | 2.265914000000  | 0.000097000000  |
| C  | -4.049967000000 | 1.709866000000  | -1.209743000000 |
| C  | 1.418927000000  | -0.637396000000 | 2.685327000000  |
| C  | 1.864057000000  | 1.742935000000  | 2.320130000000  |
| C  | 3.613607000000  | 2.195269000000  | -0.738006000000 |
| C  | 2.014461000000  | 1.429402000000  | -2.497010000000 |

|   |                 |                 |                 |
|---|-----------------|-----------------|-----------------|
| C | 3.940157000000  | -1.241543000000 | -1.146310000000 |
| C | 1.657483000000  | -1.792560000000 | -2.034983000000 |
| C | 2.303702000000  | -2.574793000000 | 0.194420000000  |
| C | 1.191643000000  | 2.853343000000  | -0.683072000000 |
| C | 3.730324000000  | 0.105530000000  | 2.046750000000  |
| H | -2.854392000000 | 0.164041000000  | 2.147876000000  |
| H | -2.901587000000 | 0.144694000000  | -2.163741000000 |
| H | -4.355474000000 | 2.146323000000  | 2.148449000000  |
| H | -5.138435000000 | 3.115760000000  | 0.003650000000  |
| H | 1.678184000000  | -0.460988000000 | 3.737296000000  |
| H | 0.342905000000  | -0.470557000000 | 2.565762000000  |
| H | 1.616702000000  | -1.687007000000 | 2.471834000000  |
| H | 2.026574000000  | 1.770574000000  | 3.404715000000  |
| H | 2.480114000000  | 2.532637000000  | 1.885170000000  |
| H | 0.808602000000  | 1.973538000000  | 2.138586000000  |
| H | 4.360623000000  | 1.420330000000  | -0.926570000000 |
| H | 3.831333000000  | 3.032974000000  | -1.413244000000 |
| H | 3.754447000000  | 2.561510000000  | 0.281922000000  |
| H | 2.139034000000  | 2.374492000000  | -3.039761000000 |
| H | 2.760220000000  | 0.733911000000  | -2.887282000000 |
| H | 1.015136000000  | 1.044192000000  | -2.726849000000 |
| H | 4.317199000000  | -2.207276000000 | -1.507208000000 |
| H | 4.097604000000  | -0.516753000000 | -1.949148000000 |
| H | 4.558405000000  | -0.944794000000 | -0.295365000000 |
| H | 1.711730000000  | -1.059526000000 | -2.839321000000 |
| H | 2.070251000000  | -2.732767000000 | -2.423192000000 |
| H | 0.602107000000  | -1.958849000000 | -1.795695000000 |
| H | 2.597873000000  | -3.492090000000 | -0.330362000000 |
| H | 2.944746000000  | -2.491110000000 | 1.074686000000  |
| H | 1.264246000000  | -2.698596000000 | 0.516399000000  |
| H | 1.428881000000  | 3.705033000000  | -1.333766000000 |
| H | 1.240564000000  | 3.208708000000  | 0.345686000000  |
| H | 0.157927000000  | 2.550506000000  | -0.886803000000 |
| H | 4.361112000000  | 0.757628000000  | 1.437437000000  |
| H | 4.025075000000  | -0.929047000000 | 1.854751000000  |
| H | 3.959568000000  | 0.314080000000  | 3.099868000000  |
| H | -4.402194000000 | 2.127632000000  | -2.148627000000 |

|                                              |                             |
|----------------------------------------------|-----------------------------|
| Zero-point correction=                       | 0.469825 (Hartree/Particle) |
| Thermal correction to Energy=                | 0.495695                    |
| Thermal correction to Enthalpy=              | 0.496640                    |
| Thermal correction to Gibbs Free Energy=     | 0.414737                    |
| Sum of electronic and zero-point Energies=   | -3745.232217                |
| Sum of electronic and thermal Energies=      | -3745.206347                |
| Sum of electronic and thermal Enthalpies=    | -3745.205403                |
| Sum of electronic and thermal Free Energies= | -3745.287305                |

CPCM (Toluene) M06/def2TZVP E = -3748.27105597

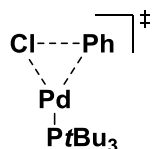

|    |                 |                 |                 |
|----|-----------------|-----------------|-----------------|
| C  | -2.877727000000 | 0.340982000000  | -0.006453000000 |
| C  | -3.410266000000 | -0.085151000000 | -1.228713000000 |
| C  | -3.396419000000 | -0.099554000000 | 1.216938000000  |
| Pd | -0.895957000000 | 0.313863000000  | -0.019355000000 |
| H  | -3.040915000000 | 0.331374000000  | -2.160154000000 |
| C  | -4.421929000000 | -1.042886000000 | -1.213711000000 |
| H  | -3.016978000000 | 0.307022000000  | 2.148838000000  |
| C  | -4.408580000000 | -1.056496000000 | 1.202650000000  |
| P  | 1.447284000000  | -0.125852000000 | -0.005098000000 |
| C  | -4.918808000000 | -1.529826000000 | -0.005512000000 |
| H  | -4.831741000000 | -1.400732000000 | -2.153989000000 |
| H  | -4.808098000000 | -1.424657000000 | 2.143395000000  |
| C  | 1.966534000000  | -0.733630000000 | 1.736732000000  |

|    |                 |                 |                 |
|----|-----------------|-----------------|-----------------|
| C  | 1.867998000000  | -1.493205000000 | -1.280581000000 |
| C  | 2.453700000000  | 1.447617000000  | -0.433697000000 |
| C  | 3.472769000000  | -0.715460000000 | 2.039893000000  |
| C  | 1.227090000000  | 0.122518000000  | 2.788237000000  |
| C  | 1.444445000000  | -2.166884000000 | 1.951611000000  |
| C  | 0.757688000000  | -2.564483000000 | -1.221096000000 |
| C  | 1.784005000000  | -0.902856000000 | -2.700196000000 |
| C  | 3.236463000000  | -2.171778000000 | -1.114491000000 |
| C  | 2.383015000000  | 2.422544000000  | 0.756332000000  |
| C  | 3.928468000000  | 1.220291000000  | -0.799846000000 |
| C  | 1.748176000000  | 2.178543000000  | -1.596240000000 |
| H  | 4.054668000000  | -1.290281000000 | 1.315054000000  |
| H  | 3.879116000000  | 0.298206000000  | 2.075888000000  |
| H  | 3.642775000000  | -1.163744000000 | 3.027418000000  |
| H  | 0.142902000000  | 0.077221000000  | 2.636454000000  |
| H  | 1.448376000000  | -0.279031000000 | 3.785602000000  |
| H  | 1.519562000000  | 1.171616000000  | 2.785367000000  |
| H  | 1.574639000000  | -2.427179000000 | 3.009307000000  |
| H  | 0.376221000000  | -2.247044000000 | 1.722331000000  |
| H  | 1.988955000000  | -2.913405000000 | 1.369808000000  |
| H  | 0.728100000000  | -3.113453000000 | -0.280576000000 |
| H  | -0.230033000000 | -2.116140000000 | -1.380716000000 |
| H  | 0.929684000000  | -3.296299000000 | -2.021006000000 |
| H  | 2.610173000000  | -0.227383000000 | -2.930963000000 |
| H  | 1.829835000000  | -1.726378000000 | -3.423541000000 |
| H  | 0.838448000000  | -0.374077000000 | -2.861219000000 |
| H  | 3.387233000000  | -2.882238000000 | -1.937592000000 |
| H  | 4.062996000000  | -1.457317000000 | -1.140663000000 |
| H  | 3.308817000000  | -2.740264000000 | -0.184131000000 |
| H  | 1.348801000000  | 2.593715000000  | 1.073573000000  |
| H  | 2.972238000000  | 2.092763000000  | 1.614663000000  |
| H  | 2.794102000000  | 3.388019000000  | 0.437100000000  |
| H  | 4.043485000000  | 0.672434000000  | -1.738726000000 |
| H  | 4.415465000000  | 2.194471000000  | -0.936445000000 |
| H  | 4.478694000000  | 0.684210000000  | -0.022591000000 |
| H  | 1.778363000000  | 1.631290000000  | -2.537952000000 |
| H  | 0.700709000000  | 2.387999000000  | -1.356161000000 |
| H  | 2.255706000000  | 3.137476000000  | -1.761966000000 |
| Cl | -2.175380000000 | 2.400410000000  | 0.006146000000  |
| H  | -5.715786000000 | -2.266793000000 | -0.005220000000 |

|                                              |                             |
|----------------------------------------------|-----------------------------|
| Zero-point correction=                       | 0.469693 (Hartree/Particle) |
| Thermal correction to Energy=                | 0.495563                    |
| Thermal correction to Enthalpy=              | 0.496508                    |
| Thermal correction to Gibbs Free Energy=     | 0.415082                    |
| Sum of electronic and zero-point Energies=   | -1633.964516                |
| Sum of electronic and thermal Energies=      | -1633.938646                |
| Sum of electronic and thermal Enthalpies=    | -1633.937702                |
| Sum of electronic and thermal Free Energies= | -1634.019127                |

CPCM (Toluene) M06/def2TZVP E = -1634.38828698

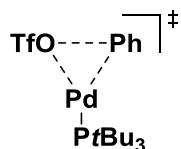

|    |                |                |                 |
|----|----------------|----------------|-----------------|
| C  | 1.328587000000 | 4.436856000000 | -0.446967000000 |
| C  | 1.770645000000 | 2.162080000000 | -1.157635000000 |
| C  | 1.670018000000 | 1.782096000000 | 0.188984000000  |
| C  | 1.512700000000 | 2.700063000000 | 1.236315000000  |
| H  | 1.559258000000 | 2.373620000000 | 2.269541000000  |
| Pd | 0.181300000000 | 0.553674000000 | 0.193856000000  |
| H  | 2.038796000000 | 1.438743000000 | -1.919731000000 |
| C  | 1.308765000000 | 4.034636000000 | 0.890604000000  |
| C  | 1.563323000000 | 3.510258000000 | -1.460523000000 |
| H  | 1.149510000000 | 4.767505000000 | 1.676180000000  |

|   |                 |                 |                 |
|---|-----------------|-----------------|-----------------|
| H | 1.613471000000  | 3.834237000000  | -2.496037000000 |
| O | 3.159244000000  | 0.565987000000  | 0.654822000000  |
| S | 2.897979000000  | -0.901608000000 | 0.861884000000  |
| O | 3.656319000000  | -1.515947000000 | 1.931878000000  |
| O | 1.444148000000  | -1.215155000000 | 0.815107000000  |
| C | 3.514455000000  | -1.631056000000 | -0.717170000000 |
| F | 3.289778000000  | -2.940122000000 | -0.733650000000 |
| F | 4.812814000000  | -1.406311000000 | -0.863877000000 |
| F | 2.863511000000  | -1.076633000000 | -1.749824000000 |
| H | -1.681607000000 | 2.512179000000  | -0.829194000000 |
| C | -2.750970000000 | 2.306633000000  | -0.702450000000 |
| C | -3.093141000000 | 0.853635000000  | -1.101089000000 |
| H | -3.305181000000 | 2.988211000000  | -1.360448000000 |
| H | -3.019955000000 | 2.554220000000  | 0.323498000000  |
| C | -4.614735000000 | 0.652199000000  | -1.022122000000 |
| P | -2.043504000000 | -0.332763000000 | -0.024849000000 |
| C | -2.658673000000 | 0.730066000000  | -2.573549000000 |
| H | -4.915626000000 | -0.367690000000 | -1.274572000000 |
| H | -5.014701000000 | 0.889193000000  | -0.033138000000 |
| H | -5.103279000000 | 1.327040000000  | -1.736624000000 |
| C | -1.995112000000 | -2.056621000000 | -0.854065000000 |
| C | -2.853468000000 | -0.489963000000 | 1.699887000000  |
| H | -3.131741000000 | 1.540379000000  | -3.141977000000 |
| H | -1.574576000000 | 0.840512000000  | -2.685975000000 |
| H | -2.968903000000 | -0.209245000000 | -3.035419000000 |
| C | -0.944599000000 | -2.014473000000 | -1.985266000000 |
| C | -1.459607000000 | -3.094945000000 | 0.150898000000  |
| C | -3.333466000000 | -2.560714000000 | -1.414985000000 |
| C | -3.202888000000 | 0.912361000000  | 2.231938000000  |
| C | -4.113859000000 | -1.366576000000 | 1.765311000000  |
| C | -1.794372000000 | -1.040784000000 | 2.679574000000  |
| H | -1.190607000000 | -1.321030000000 | -2.788966000000 |
| H | 0.042991000000  | -1.751820000000 | -1.593356000000 |
| H | -0.870324000000 | -3.015435000000 | -2.429157000000 |
| H | -2.174468000000 | -3.329883000000 | 0.942394000000  |
| H | -1.268014000000 | -4.028591000000 | -0.392384000000 |
| H | -0.513414000000 | -2.776601000000 | 0.598944000000  |
| H | -3.197177000000 | -3.579611000000 | -1.799208000000 |
| H | -4.117021000000 | -2.598068000000 | -0.653989000000 |
| H | -3.695197000000 | -1.951058000000 | -2.246776000000 |
| H | -2.344778000000 | 1.591156000000  | 2.174937000000  |
| H | -4.050784000000 | 1.369012000000  | 1.716981000000  |
| H | -3.479590000000 | 0.820492000000  | 3.289321000000  |
| H | -3.898809000000 | -2.418795000000 | 1.565004000000  |
| H | -4.536313000000 | -1.311153000000 | 2.776803000000  |
| H | -4.888715000000 | -1.039191000000 | 1.067810000000  |
| H | -1.447742000000 | -2.043795000000 | 2.437296000000  |
| H | -0.915069000000 | -0.388972000000 | 2.719855000000  |
| H | -2.234812000000 | -1.076947000000 | 3.684159000000  |
| H | 1.185261000000  | 5.483592000000  | -0.694990000000 |

|                                              |                             |
|----------------------------------------------|-----------------------------|
| Zero-point correction=                       | 0.496990 (Hartree/Particle) |
| Thermal correction to Energy=                | 0.529880                    |
| Thermal correction to Enthalpy=              | 0.530824                    |
| Thermal correction to Gibbs Free Energy=     | 0.432605                    |
| Sum of electronic and zero-point Energies=   | -2134.981452                |
| Sum of electronic and thermal Energies=      | -2134.948562                |
| Sum of electronic and thermal Enthalpies=    | -2134.947618                |
| Sum of electronic and thermal Free Energies= | -2135.045838                |
| CPCM (Toluene) M06/def2TZVP E =              | -2135.68378565              |

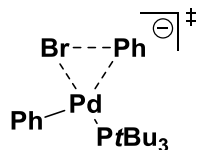

|    |                 |                 |                 |
|----|-----------------|-----------------|-----------------|
| C  | -3.442037000000 | 2.163036000000  | 2.255249000000  |
| C  | -2.907579000000 | -0.105311000000 | 1.548838000000  |
| C  | -2.228334000000 | 0.406255000000  | 0.421829000000  |
| C  | -2.275042000000 | 1.804683000000  | 0.161453000000  |
| H  | -2.068125000000 | 2.189285000000  | -0.835865000000 |
| Pd | -0.297200000000 | 0.727898000000  | 0.029814000000  |
| Br | -3.163930000000 | -0.626568000000 | -1.780449000000 |
| H  | -2.939873000000 | -1.175523000000 | 1.724093000000  |
| C  | -2.870287000000 | 2.670439000000  | 1.106839000000  |
| C  | -3.466302000000 | 0.767640000000  | 2.461597000000  |
| H  | -2.923758000000 | 3.735055000000  | 0.890122000000  |
| H  | -3.913902000000 | 0.369441000000  | 3.370737000000  |
| C  | 0.836155000000  | -4.200971000000 | 0.210649000000  |
| C  | 0.114209000000  | -2.923666000000 | -0.257321000000 |
| H  | 0.823495000000  | -4.303210000000 | 1.299718000000  |
| H  | 0.297897000000  | -5.068143000000 | -0.195648000000 |
| H  | 1.871381000000  | -4.274300000000 | -0.126518000000 |
| P  | 0.990410000000  | -1.252230000000 | 0.148358000000  |
| C  | -1.295643000000 | -2.932657000000 | 0.362053000000  |
| C  | -0.124668000000 | -3.013106000000 | -1.777032000000 |
| C  | 2.539464000000  | -1.162842000000 | -0.999453000000 |
| C  | 1.626670000000  | -1.392993000000 | 1.960378000000  |
| H  | -1.921472000000 | -2.160533000000 | -0.088473000000 |
| H  | -1.758238000000 | -3.903741000000 | 0.137012000000  |
| H  | -1.296872000000 | -2.815473000000 | 1.444725000000  |
| H  | -0.798393000000 | -3.858588000000 | -1.967272000000 |
| H  | -0.630867000000 | -2.117695000000 | -2.152594000000 |
| H  | 0.790589000000  | -3.194116000000 | -2.346023000000 |
| C  | 2.063584000000  | -0.623149000000 | -2.363922000000 |
| C  | 3.548374000000  | -0.124748000000 | -0.471922000000 |
| C  | 3.308723000000  | -2.474817000000 | -1.232414000000 |
| C  | 0.486193000000  | -1.863135000000 | 2.882936000000  |
| C  | 2.836806000000  | -2.315338000000 | 2.185404000000  |
| C  | 1.986793000000  | 0.018798000000  | 2.459432000000  |
| H  | 1.345510000000  | -1.273237000000 | -2.862863000000 |
| H  | 1.605950000000  | 0.359490000000  | -2.245105000000 |
| H  | 2.935927000000  | -0.516904000000 | -3.023834000000 |
| H  | 4.069447000000  | -0.456771000000 | 0.429960000000  |
| H  | 4.312663000000  | 0.031260000000  | -1.245431000000 |
| H  | 3.073144000000  | 0.839146000000  | -0.280237000000 |
| H  | 4.188930000000  | -2.253004000000 | -1.851725000000 |
| H  | 3.670998000000  | -2.924855000000 | -0.304128000000 |
| H  | 2.719963000000  | -3.220410000000 | -1.771173000000 |
| H  | -0.428270000000 | -1.283333000000 | 2.719757000000  |
| H  | 0.799075000000  | -1.706561000000 | 3.924297000000  |
| H  | 3.743659000000  | -1.930644000000 | 1.713367000000  |
| H  | 3.036363000000  | -2.377504000000 | 3.264363000000  |
| H  | 2.670339000000  | -3.332037000000 | 1.824440000000  |
| H  | 2.728155000000  | 0.525745000000  | 1.843896000000  |
| H  | 1.094894000000  | 0.651742000000  | 2.485164000000  |
| H  | 2.387190000000  | -0.060806000000 | 3.480429000000  |
| H  | 0.259775000000  | -2.925927000000 | 2.770706000000  |
| C  | 1.125998000000  | 2.273176000000  | -0.261331000000 |
| C  | 1.766845000000  | 3.001897000000  | 0.760919000000  |
| C  | 1.281695000000  | 2.821212000000  | -1.553177000000 |
| C  | 2.526569000000  | 4.148154000000  | 0.521287000000  |
| C  | 2.033243000000  | 3.967768000000  | -1.814045000000 |
| C  | 2.672959000000  | 4.637827000000  | -0.774080000000 |
| H  | 1.671049000000  | 2.670658000000  | 1.793722000000  |
| H  | 0.788644000000  | 2.341014000000  | -2.399498000000 |
| H  | 3.003154000000  | 4.664139000000  | 1.354270000000  |
| H  | 2.117042000000  | 4.340783000000  | -2.834109000000 |



H 3.264386000000 5.530141000000 -0.968239000000  
H -3.903609000000 2.826536000000 2.981867000000

Zero-point correction= 0.558884 (Hartree/Particle)  
Thermal correction to Energy= 0.590252  
Thermal correction to Enthalpy= 0.591196  
Thermal correction to Gibbs Free Energy= 0.498364  
Sum of electronic and zero-point Energies= -3976.714783  
Sum of electronic and thermal Energies= -3976.683415  
Sum of electronic and thermal Enthalpies= -3976.682471  
Sum of electronic and thermal Free Energies= -3976.775303  
CPCM (Toluene) M06/def2TZVP E = -3979.86060938

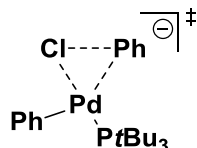

C -3.442037000000 2.163036000000 2.255249000000  
C -3.331262000000 -3.106739000000 1.420668000000  
C -0.952131000000 -3.169607000000 0.906799000000  
C -1.144201000000 -2.192322000000 -0.091259000000  
C -2.463004000000 -1.766113000000 -0.399854000000  
H -2.673759000000 -1.274191000000 -1.348932000000  
Pd -0.813438000000 -0.229113000000 -0.142759000000  
Cl -0.345718000000 -3.095406000000 -2.315201000000  
H 0.042599000000 -3.553994000000 1.106668000000  
C -3.545784000000 -2.220438000000 0.384165000000  
C -2.028550000000 -3.585553000000 1.667142000000  
H -4.555832000000 -1.909787000000 0.126106000000  
H -1.861828000000 -4.281799000000 2.487510000000  
C 4.192086000000 -0.843373000000 0.034552000000  
C 2.753543000000 -1.021951000000 -0.485866000000  
H 4.268812000000 -1.050331000000 1.105985000000  
H 4.833751000000 -1.573839000000 -0.476570000000  
H 4.613125000000 0.145851000000 -0.152313000000  
P 1.473206000000 0.291416000000 0.108790000000  
C 2.284223000000 -2.432959000000 -0.083886000000  
C 2.774869000000 -1.043682000000 -2.026479000000  
C 1.925453000000 1.937403000000 -0.793308000000  
C 1.787628000000 0.560334000000 1.988662000000  
H 1.356869000000 -2.692646000000 -0.598745000000  
H 3.051482000000 -3.147655000000 -0.412652000000  
H 2.159035000000 -2.564082000000 0.990219000000  
H 3.347472000000 -1.924042000000 -2.345419000000  
H 1.765783000000 -1.163374000000 -2.435143000000  
H 3.260057000000 -0.167325000000 -2.463576000000  
C 1.283380000000 1.882782000000 -2.194504000000  
C 1.274535000000 3.139781000000 -0.083927000000  
C 3.422810000000 2.250136000000 -0.952545000000  
C 1.831230000000 -0.799530000000 2.710327000000  
C 3.057523000000 1.344808000000 2.359949000000  
C 0.568483000000 1.288505000000 2.583846000000  
H 1.686077000000 1.093152000000 -2.828183000000  
H 0.205977000000 1.736641000000 -2.113574000000  
H 1.460197000000 2.842481000000 -2.699859000000  
H 1.747985000000 3.376650000000 0.872382000000  
H 1.393600000000 4.021249000000 -0.728198000000  
H 0.205058000000 2.987196000000 0.070618000000  
H 3.521643000000 3.236040000000 -1.427419000000  
H 3.949016000000 2.295963000000 0.004647000000  
H 3.937318000000 1.533267000000 -1.595912000000  
H 0.982236000000 -1.429910000000 2.425887000000  
H 1.765090000000 -0.617894000000 3.791712000000  
H 3.007552000000 2.388699000000 2.041583000000  
H 3.162712000000 1.346937000000 3.453910000000

|   |                 |                 |                 |
|---|-----------------|-----------------|-----------------|
| H | 3.966677000000  | 0.905575000000  | 1.944604000000  |
| H | 0.354424000000  | 2.245851000000  | 2.110687000000  |
| H | -0.326315000000 | 0.667503000000  | 2.485537000000  |
| H | 0.752379000000  | 1.468280000000  | 3.652804000000  |
| H | 2.758837000000  | -1.348174000000 | 2.531092000000  |
| C | -1.795848000000 | 1.650790000000  | -0.139901000000 |
| C | -2.303341000000 | 2.299569000000  | 1.003998000000  |
| C | -2.224199000000 | 2.208401000000  | -1.364255000000 |
| C | -3.126784000000 | 3.424900000000  | 0.942917000000  |
| C | -3.048795000000 | 3.331152000000  | -1.447653000000 |
| C | -3.500282000000 | 3.957141000000  | -0.288518000000 |
| H | -2.054224000000 | 1.914457000000  | 1.991358000000  |
| H | -1.910206000000 | 1.746013000000  | -2.300733000000 |
| H | -3.483204000000 | 3.885279000000  | 1.863764000000  |
| H | -3.341396000000 | 3.716922000000  | -2.423444000000 |
| H | -4.138909000000 | 4.836268000000  | -0.343630000000 |
| H | -4.162344000000 | -3.461990000000 | 2.024299000000  |

|                                              |                             |
|----------------------------------------------|-----------------------------|
| Zero-point correction=                       | 0.560413 (Hartree/Particle) |
| Thermal correction to Energy=                | 0.591182                    |
| Thermal correction to Enthalpy=              | 0.592126                    |
| Thermal correction to Gibbs Free Energy=     | 0.501656                    |
| Sum of electronic and zero-point Energies=   | -1865.452518                |
| Sum of electronic and thermal Energies=      | -1865.421749                |
| Sum of electronic and thermal Enthalpies=    | -1865.420805                |
| Sum of electronic and thermal Free Energies= | -1865.511275                |

CPCM (Toluene) M06/def2TZVP E = -1865.98455186

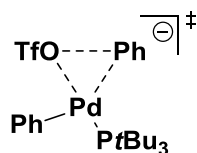

|   |                 |                 |                 |
|---|-----------------|-----------------|-----------------|
| C | -1.073146000000 | 2.819971000000  | 3.118062000000  |
| C | -1.416910000000 | 0.428540000000  | 2.802974000000  |
| C | -1.422522000000 | 0.624157000000  | 1.389167000000  |
| C | -1.387670000000 | 1.961230000000  | 0.855448000000  |
| H | -1.842584000000 | 2.184947000000  | -0.105244000000 |
| H | -1.545386000000 | -0.575972000000 | 3.195586000000  |
| C | -1.217827000000 | 3.044416000000  | 1.776469000000  |
| C | -1.177725000000 | 1.493217000000  | 3.629008000000  |
| H | -1.239090000000 | 4.058436000000  | 1.384928000000  |
| H | -1.063974000000 | 1.323274000000  | 4.697836000000  |
| O | -2.888955000000 | -0.392980000000 | 0.892302000000  |
| S | -3.999631000000 | -0.022111000000 | -0.067854000000 |
| O | -5.180060000000 | -0.843907000000 | 0.148540000000  |
| O | -4.174218000000 | 1.407374000000  | -0.273365000000 |
| C | -3.320048000000 | -0.632305000000 | -1.672438000000 |
| F | -4.181991000000 | -0.388105000000 | -2.662730000000 |
| F | -3.104231000000 | -1.950365000000 | -1.624731000000 |
| F | -2.163018000000 | -0.032530000000 | -1.973915000000 |
| H | 2.163206000000  | -4.381205000000 | -0.131831000000 |
| C | 1.248989000000  | -4.222730000000 | 0.443564000000  |
| C | 0.489955000000  | -2.944884000000 | 0.046034000000  |
| H | 1.508695000000  | -4.232777000000 | 1.505437000000  |
| H | 0.594777000000  | -5.087686000000 | 0.267079000000  |
| P | 1.491443000000  | -1.300360000000 | 0.088569000000  |
| C | -0.737393000000 | -2.807175000000 | 0.966772000000  |
| C | -0.089390000000 | -3.142843000000 | -1.366540000000 |
| C | 2.713500000000  | -1.364468000000 | -1.404175000000 |
| C | 2.556816000000  | -1.336460000000 | 1.694599000000  |
| H | -1.394049000000 | -1.999220000000 | 0.645085000000  |
| H | -1.307072000000 | -3.745950000000 | 0.925065000000  |
| H | -0.480738000000 | -2.627887000000 | 2.010682000000  |
| H | -0.859432000000 | -3.923229000000 | -1.321965000000 |

|    |                 |                 |                 |
|----|-----------------|-----------------|-----------------|
| H  | -0.572224000000 | -2.233804000000 | -1.732774000000 |
| H  | 0.659310000000  | -3.467255000000 | -2.093115000000 |
| C  | 1.934937000000  | -0.933695000000 | -2.664124000000 |
| C  | 3.818515000000  | -0.305214000000 | -1.224785000000 |
| C  | 3.395136000000  | -2.713620000000 | -1.689323000000 |
| C  | 1.682868000000  | -1.712025000000 | 2.905450000000  |
| C  | 3.777720000000  | -2.271260000000 | 1.684331000000  |
| C  | 3.030240000000  | 0.103397000000  | 1.978608000000  |
| H  | 1.169067000000  | -1.647945000000 | -2.966223000000 |
| H  | 1.464196000000  | 0.038453000000  | -2.511041000000 |
| H  | 2.644199000000  | -0.838482000000 | -3.497830000000 |
| H  | 4.533725000000  | -0.562160000000 | -0.439718000000 |
| H  | 4.383612000000  | -0.238392000000 | -2.164209000000 |
| H  | 3.398899000000  | 0.682460000000  | -1.022619000000 |
| H  | 4.112171000000  | -2.575718000000 | -2.510512000000 |
| H  | 3.952649000000  | -3.098247000000 | -0.831758000000 |
| H  | 2.687891000000  | -3.482176000000 | -2.010498000000 |
| H  | 0.781263000000  | -1.094879000000 | 2.952574000000  |
| H  | 1.398445000000  | -2.766772000000 | 2.920006000000  |
| H  | 2.261974000000  | -1.521220000000 | 3.819350000000  |
| H  | 4.534765000000  | -1.962067000000 | 0.960450000000  |
| H  | 4.250448000000  | -2.242793000000 | 2.675877000000  |
| H  | 3.513412000000  | -3.311392000000 | 1.478135000000  |
| H  | 3.600397000000  | 0.546834000000  | 1.163273000000  |
| H  | 2.170544000000  | 0.753817000000  | 2.168286000000  |
| H  | 3.665664000000  | 0.095511000000  | 2.875953000000  |
| Pd | 0.213980000000  | 0.697692000000  | 0.207131000000  |
| C  | 1.447669000000  | 2.150924000000  | -0.705724000000 |
| C  | 1.240893000000  | 2.538261000000  | -2.046154000000 |
| C  | 2.381272000000  | 2.940643000000  | -0.004533000000 |
| C  | 1.929893000000  | 3.589404000000  | -2.652825000000 |
| C  | 3.082618000000  | 3.994162000000  | -0.593182000000 |
| C  | 2.867907000000  | 4.322255000000  | -1.929942000000 |
| H  | 0.504781000000  | 2.003587000000  | -2.647784000000 |
| H  | 2.570203000000  | 2.733029000000  | 1.048142000000  |
| H  | 1.730300000000  | 3.837952000000  | -3.694492000000 |
| H  | 3.796578000000  | 4.566434000000  | -0.001620000000 |
| H  | 3.411859000000  | 5.141412000000  | -2.395566000000 |
| H  | -0.927894000000 | 3.648119000000  | 3.806289000000  |

|                                              |                             |
|----------------------------------------------|-----------------------------|
| Zero-point correction=                       | 0.588592 (Hartree/Particle) |
| Thermal correction to Energy=                | 0.626071                    |
| Thermal correction to Enthalpy=              | 0.627015                    |
| Thermal correction to Gibbs Free Energy=     | 0.521457                    |
| Sum of electronic and zero-point Energies=   | -2366.496160                |
| Sum of electronic and thermal Energies=      | -2366.458682                |
| Sum of electronic and thermal Enthalpies=    | -2366.457738                |
| Sum of electronic and thermal Free Energies= | -2366.563296                |

CPCM (Toluene) M06/def2TZVP E = -2367.3053651

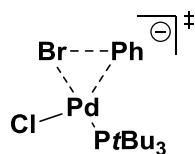

|    |                |                 |                 |
|----|----------------|-----------------|-----------------|
| C  | 4.067924000000 | -1.676878000000 | 1.576572000000  |
| C  | 2.528015000000 | 0.203606000000  | 1.695839000000  |
| C  | 2.201438000000 | -0.007033000000 | 0.343530000000  |
| C  | 2.890686000000 | -0.974214000000 | -0.422221000000 |
| H  | 2.846750000000 | -0.962533000000 | -1.508414000000 |
| Pd | 0.578320000000 | -0.854276000000 | -0.452764000000 |
| Br | 2.467477000000 | 2.212876000000  | -0.983587000000 |
| H  | 2.042347000000 | 0.987678000000  | 2.263543000000  |
| C  | 3.806549000000 | -1.826721000000 | 0.228035000000  |
| C  | 3.432173000000 | -0.650323000000 | 2.299707000000  |
| H  | 4.340499000000 | -2.570186000000 | -0.358180000000 |

|    |                 |                 |                 |
|----|-----------------|-----------------|-----------------|
| H  | 3.635777000000  | -0.535555000000 | 3.362463000000  |
| Cl | -0.071115000000 | -2.859194000000 | -1.750087000000 |
| C  | -2.687181000000 | 2.522808000000  | 1.466480000000  |
| C  | -1.458140000000 | 2.021824000000  | 0.686544000000  |
| H  | -2.734304000000 | 2.093791000000  | 2.471567000000  |
| H  | -2.596747000000 | 3.610753000000  | 1.589039000000  |
| H  | -3.637777000000 | 2.328092000000  | 0.967086000000  |
| P  | -1.471953000000 | 0.162218000000  | 0.186650000000  |
| C  | -0.212081000000 | 2.316603000000  | 1.542781000000  |
| C  | -1.271612000000 | 2.887312000000  | -0.575358000000 |
| C  | -2.773487000000 | -0.015927000000 | -1.224207000000 |
| C  | -2.108580000000 | -0.839064000000 | 1.700205000000  |
| H  | 0.698104000000  | 2.165858000000  | 0.960257000000  |
| H  | -0.241520000000 | 3.376270000000  | 1.832323000000  |
| H  | -0.161301000000 | 1.730300000000  | 2.459812000000  |
| H  | -1.090019000000 | 3.921265000000  | -0.253829000000 |
| H  | -0.389247000000 | 2.573841000000  | -1.142489000000 |
| H  | -2.145716000000 | 2.901520000000  | -1.229670000000 |
| C  | -2.046715000000 | 0.319877000000  | -2.545053000000 |
| C  | -3.247486000000 | -1.474236000000 | -1.374266000000 |
| C  | -4.036299000000 | 0.854017000000  | -1.095317000000 |
| C  | -1.295845000000 | -0.450575000000 | 2.949493000000  |
| C  | -3.603293000000 | -0.688357000000 | 2.029970000000  |
| C  | -1.803742000000 | -2.332894000000 | 1.462695000000  |
| H  | -1.603215000000 | 1.315898000000  | -2.560655000000 |
| H  | -1.253100000000 | -0.408619000000 | -2.735752000000 |
| H  | -2.772829000000 | 0.261146000000  | -3.368004000000 |
| H  | -3.905302000000 | -1.794711000000 | -0.561871000000 |
| H  | -3.830905000000 | -1.540189000000 | -2.302985000000 |
| H  | -2.407140000000 | -2.166808000000 | -1.466418000000 |
| H  | -4.707333000000 | 0.611262000000  | -1.930463000000 |
| H  | -4.585745000000 | 0.655251000000  | -0.170104000000 |
| H  | -3.831696000000 | 1.924915000000  | -1.150472000000 |
| H  | -0.219002000000 | -0.477527000000 | 2.750979000000  |
| H  | -1.507654000000 | -1.182248000000 | 3.740756000000  |
| H  | -4.244230000000 | -1.088622000000 | 1.241447000000  |
| H  | -3.822196000000 | -1.257083000000 | 2.944595000000  |
| H  | -3.895290000000 | 0.347951000000  | 2.211317000000  |
| H  | -2.291484000000 | -2.746234000000 | 0.581449000000  |
| H  | -0.730191000000 | -2.502025000000 | 1.338301000000  |
| H  | -2.147651000000 | -2.898842000000 | 2.340316000000  |
| H  | -1.562057000000 | 0.534489000000  | 3.341152000000  |
| H  | 4.780067000000  | -2.328970000000 | 2.074719000000  |

|                                              |                             |
|----------------------------------------------|-----------------------------|
| Zero-point correction=                       | 0.468625 (Hartree/Particle) |
| Thermal correction to Energy=                | 0.496857                    |
| Thermal correction to Enthalpy=              | 0.497801                    |
| Thermal correction to Gibbs Free Energy=     | 0.411327                    |
| Sum of electronic and zero-point Energies=   | -4205.502680                |
| Sum of electronic and thermal Energies=      | -4205.474447                |
| Sum of electronic and thermal Enthalpies=    | -4205.473503                |
| Sum of electronic and thermal Free Energies= | -4205.559977                |

CPCM (Toluene) M06/def2TZVP E = -4208.60414359

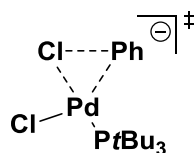

|    |                |                 |                 |
|----|----------------|-----------------|-----------------|
| C  | 4.434242000000 | -0.493561000000 | 1.355315000000  |
| C  | 2.752760000000 | 1.254906000000  | 1.132724000000  |
| C  | 2.350349000000 | 0.670946000000  | -0.091403000000 |
| C  | 3.075120000000 | -0.412425000000 | -0.656759000000 |
| H  | 3.010455000000 | -0.632959000000 | -1.718147000000 |
| Pd | 0.880278000000 | -0.635129000000 | -0.336325000000 |
| Cl | 2.177563000000 | 2.378957000000  | -1.718985000000 |
| H  | 2.241636000000 | 2.131540000000  | 1.513100000000  |

|    |                 |                 |                 |
|----|-----------------|-----------------|-----------------|
| C  | 4.112012000000  | -0.996416000000 | 0.115293000000  |
| C  | 3.754041000000  | 0.641831000000  | 1.853329000000  |
| H  | 4.675876000000  | -1.822539000000 | -0.309776000000 |
| H  | 4.013181000000  | 1.034110000000  | 2.834666000000  |
| Cl | 0.572208000000  | -3.063296000000 | -0.825779000000 |
| C  | -2.893737000000 | 2.571715000000  | 0.695948000000  |
| C  | -1.602014000000 | 2.044098000000  | 0.047318000000  |
| H  | -2.875137000000 | 2.465134000000  | 1.784665000000  |
| H  | -2.977366000000 | 3.646085000000  | 0.481975000000  |
| H  | -3.799842000000 | 2.092303000000  | 0.321374000000  |
| P  | -1.325289000000 | 0.140648000000  | 0.121603000000  |
| C  | -0.413008000000 | 2.762254000000  | 0.714289000000  |
| C  | -1.553912000000 | 2.498764000000  | -1.424705000000 |
| C  | -2.587822000000 | -0.650057000000 | -1.102578000000 |
| C  | -1.790958000000 | -0.438203000000 | 1.894196000000  |
| H  | 0.505717000000  | 2.575062000000  | 0.157944000000  |
| H  | -0.603892000000 | 3.843857000000  | 0.676459000000  |
| H  | -0.264277000000 | 2.493603000000  | 1.759533000000  |
| H  | -1.511480000000 | 3.595766000000  | -1.444126000000 |
| H  | -0.646723000000 | 2.137710000000  | -1.919175000000 |
| H  | -2.432713000000 | 2.198204000000  | -1.999704000000 |
| C  | -1.936223000000 | -0.616879000000 | -2.502457000000 |
| C  | -2.801558000000 | -2.143302000000 | -0.788834000000 |
| C  | -3.978549000000 | 0.004491000000  | -1.169949000000 |
| C  | -1.057732000000 | 0.434875000000  | 2.929739000000  |
| C  | -3.290125000000 | -0.433166000000 | 2.238286000000  |
| C  | -1.239207000000 | -1.864389000000 | 2.101431000000  |
| H  | -1.690224000000 | 0.388220000000  | -2.846558000000 |
| H  | -1.019457000000 | -1.214375000000 | -2.508829000000 |
| H  | -2.637826000000 | -1.056800000000 | -3.225414000000 |
| H  | -3.384195000000 | -2.308508000000 | 0.121239000000  |
| H  | -3.372765000000 | -2.581261000000 | -1.619056000000 |
| H  | -1.850875000000 | -2.679908000000 | -0.722463000000 |
| H  | -4.604378000000 | -0.584967000000 | -1.854050000000 |
| H  | -4.481307000000 | 0.014690000000  | -0.198235000000 |
| H  | -3.955932000000 | 1.025429000000  | -1.557136000000 |
| H  | 0.009131000000  | 0.521133000000  | 2.697837000000  |
| H  | -1.148258000000 | -0.046313000000 | 3.912965000000  |
| H  | -3.854513000000 | -1.153155000000 | 1.641740000000  |
| H  | -3.412333000000 | -0.720351000000 | 3.292101000000  |
| H  | -3.752820000000 | 0.548047000000  | 2.110967000000  |
| H  | -1.645050000000 | -2.598069000000 | 1.406978000000  |
| H  | -0.152134000000 | -1.890003000000 | 1.983534000000  |
| H  | -1.487750000000 | -2.186350000000 | 3.123161000000  |
| H  | -1.485872000000 | 1.436643000000  | 3.021104000000  |
| H  | 5.229502000000  | -0.944936000000 | 1.942132000000  |

|                                              |                             |
|----------------------------------------------|-----------------------------|
| Zero-point correction=                       | 0.469559 (Hartree/Particle) |
| Thermal correction to Energy=                | 0.497328                    |
| Thermal correction to Enthalpy=              | 0.498272                    |
| Thermal correction to Gibbs Free Energy=     | 0.413597                    |
| Sum of electronic and zero-point Energies=   | -2094.238088                |
| Sum of electronic and thermal Energies=      | -2094.210318                |
| Sum of electronic and thermal Enthalpies=    | -2094.209374                |
| Sum of electronic and thermal Free Energies= | -2094.294049                |

CPCM (Toluene) M06/def2TZVP E = -2094.72397397

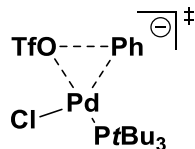

|   |                 |                |                 |
|---|-----------------|----------------|-----------------|
| C | -1.724755000000 | 3.668298000000 | 1.476273000000  |
| C | -1.706311000000 | 1.235296000000 | 1.573247000000  |
| C | -1.272902000000 | 1.214641000000 | 0.215883000000  |
| C | -1.192008000000 | 2.420362000000 | -0.544881000000 |
| H | -1.252482000000 | 2.395243000000 | -1.629235000000 |

|    |                 |                 |                 |
|----|-----------------|-----------------|-----------------|
| H  | -1.847462000000 | 0.305555000000  | 2.110777000000  |
| C  | -1.419500000000 | 3.649050000000  | 0.139325000000  |
| C  | -1.869940000000 | 2.449291000000  | 2.187977000000  |
| H  | -1.371259000000 | 4.572684000000  | -0.430307000000 |
| H  | -2.116853000000 | 2.474580000000  | 3.246814000000  |
| O  | -2.056486000000 | -0.096122000000 | -0.681334000000 |
| S  | -3.584230000000 | -0.149907000000 | -0.856830000000 |
| O  | -3.930630000000 | -0.554065000000 | -2.206933000000 |
| O  | -4.288070000000 | 0.951925000000  | -0.230306000000 |
| C  | -3.972845000000 | -1.629933000000 | 0.179315000000  |
| F  | -3.311148000000 | -2.702932000000 | -0.255652000000 |
| F  | -5.280605000000 | -1.888928000000 | 0.124024000000  |
| F  | -3.641827000000 | -1.423079000000 | 1.456652000000  |
| Cl | 2.336074000000  | 2.896907000000  | -1.187597000000 |
| H  | 2.552804000000  | -3.786969000000 | 0.388309000000  |
| C  | 1.650166000000  | -3.520992000000 | 0.941010000000  |
| C  | 0.899349000000  | -2.312473000000 | 0.355830000000  |
| H  | 1.926517000000  | -3.357138000000 | 1.986892000000  |
| H  | 0.980996000000  | -4.392281000000 | 0.920151000000  |
| P  | 1.925736000000  | -0.700848000000 | 0.095077000000  |
| C  | -0.298147000000 | -2.018438000000 | 1.279474000000  |
| C  | 0.256825000000  | -2.714357000000 | -0.986524000000 |
| C  | 3.108164000000  | -1.035823000000 | -1.388660000000 |
| C  | 3.006217000000  | -0.453146000000 | 1.663258000000  |
| H  | -0.953928000000 | -1.283977000000 | 0.819811000000  |
| H  | -0.874270000000 | -2.944804000000 | 1.405065000000  |
| H  | -0.019074000000 | -1.667341000000 | 2.272063000000  |
| H  | -0.486537000000 | -3.498846000000 | -0.795258000000 |
| H  | -0.274796000000 | -1.869759000000 | -1.435712000000 |
| H  | 0.973017000000  | -3.113800000000 | -1.707657000000 |
| C  | 2.312883000000  | -0.728501000000 | -2.677009000000 |
| C  | 4.281770000000  | -0.037444000000 | -1.390667000000 |
| C  | 3.706930000000  | -2.449247000000 | -1.483548000000 |
| C  | 2.113454000000  | -0.540801000000 | 2.915084000000  |
| C  | 4.182935000000  | -1.426487000000 | 1.841839000000  |
| C  | 3.549114000000  | 0.990804000000  | 1.650241000000  |
| H  | 1.419062000000  | -1.341922000000 | -2.796186000000 |
| H  | 2.012322000000  | 0.323677000000  | -2.695570000000 |
| H  | 2.963660000000  | -0.914356000000 | -3.543056000000 |
| H  | 5.012868000000  | -0.238323000000 | -0.603023000000 |
| H  | 4.807542000000  | -0.142319000000 | -2.349682000000 |
| H  | 3.930757000000  | 0.996079000000  | -1.316191000000 |
| H  | 4.400589000000  | -2.475717000000 | -2.335051000000 |
| H  | 4.278453000000  | -2.720217000000 | -0.590544000000 |
| H  | 2.955544000000  | -3.222695000000 | -1.658310000000 |
| H  | 1.217929000000  | 0.081485000000  | 2.812137000000  |
| H  | 1.812293000000  | -1.565117000000 | 3.150395000000  |
| H  | 2.683378000000  | -0.165798000000 | 3.775592000000  |
| H  | 4.940139000000  | -1.308469000000 | 1.063288000000  |
| H  | 4.673834000000  | -1.217971000000 | 2.802902000000  |
| H  | 3.870267000000  | -2.473179000000 | 1.854442000000  |
| H  | 4.198387000000  | 1.208253000000  | 0.803959000000  |
| H  | 2.735779000000  | 1.720888000000  | 1.614382000000  |
| H  | 4.125493000000  | 1.151581000000  | 2.572662000000  |
| Pd | 0.652081000000  | 1.275715000000  | -0.301999000000 |
| H  | -1.887017000000 | 4.611854000000  | 1.988937000000  |

|                                                |                             |
|------------------------------------------------|-----------------------------|
| Zero-point correction=                         | 0.497940 (Hartree/Particle) |
| Thermal correction to Energy=                  | 0.532469                    |
| Thermal correction to Enthalpy=                | 0.533413                    |
| Thermal correction to Gibbs Free Energy=       | 0.432975                    |
| Sum of electronic and zero-point Energies=     | -2595.279029                |
| Sum of electronic and thermal Energies=        | -2595.244501                |
| Sum of electronic and thermal Enthalpies=      | -2595.243557                |
| Sum of electronic and thermal Free Energies=   | -2595.343995                |
| CPCM (Toluene) M06/def2TZVP E = -2596.04636679 |                             |

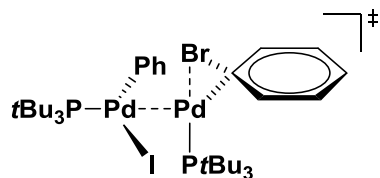

|    |                 |                 |                 |
|----|-----------------|-----------------|-----------------|
| C  | 4.709624000000  | -3.456080000000 | -1.791525000000 |
| C  | 3.042994000000  | -1.878174000000 | -2.555556000000 |
| C  | 2.278932000000  | -2.161217000000 | -1.417535000000 |
| C  | 2.680914000000  | -3.145826000000 | -0.507514000000 |
| H  | 2.039373000000  | -3.405509000000 | 0.328743000000  |
| H  | 2.685048000000  | -1.160930000000 | -3.284825000000 |
| C  | 3.916454000000  | -3.763615000000 | -0.688929000000 |
| C  | 4.265243000000  | -2.517363000000 | -2.723798000000 |
| H  | 4.248147000000  | -4.502636000000 | 0.034386000000  |
| H  | 4.871915000000  | -2.281425000000 | -3.593458000000 |
| Pd | 1.509022000000  | -0.498015000000 | -0.282129000000 |
| Pd | -1.310706000000 | 0.062309000000  | 0.098210000000  |
| Br | 0.165549000000  | -2.021637000000 | -1.723219000000 |
| H  | 5.663597000000  | -3.954100000000 | -1.932932000000 |
| H  | 2.630648000000  | 3.825791000000  | -2.040856000000 |
| C  | 2.429534000000  | 3.312427000000  | -1.092199000000 |
| C  | 3.570120000000  | 2.315814000000  | -0.823253000000 |
| H  | 1.469722000000  | 2.800437000000  | -1.199282000000 |
| H  | 2.336536000000  | 4.083097000000  | -0.324084000000 |
| P  | 3.049376000000  | 1.130393000000  | 0.595102000000  |
| C  | 4.875211000000  | 3.098916000000  | -0.610991000000 |
| C  | 3.683908000000  | 1.494236000000  | -2.123851000000 |
| C  | 2.386920000000  | 2.199537000000  | 2.046821000000  |
| C  | 4.618300000000  | 0.223826000000  | 1.229661000000  |
| H  | 5.754491000000  | 2.449796000000  | -0.609253000000 |
| H  | 5.000406000000  | 3.808098000000  | -1.439819000000 |
| H  | 4.876425000000  | 3.676864000000  | 0.315759000000  |
| H  | 4.411617000000  | 0.684451000000  | -2.074443000000 |
| H  | 2.712927000000  | 1.059808000000  | -2.380914000000 |
| H  | 3.985387000000  | 2.168885000000  | -2.936321000000 |
| C  | 3.176759000000  | 3.486278000000  | 2.340510000000  |
| C  | 0.927179000000  | 2.576907000000  | 1.739363000000  |
| C  | 2.329537000000  | 1.364581000000  | 3.339124000000  |
| C  | 4.174749000000  | -0.993253000000 | 2.068744000000  |
| C  | 5.386589000000  | -0.353752000000 | 0.028749000000  |
| C  | 5.597180000000  | 1.066404000000  | 2.063616000000  |
| H  | 4.233408000000  | 3.298104000000  | 2.542823000000  |
| H  | 3.109272000000  | 4.215070000000  | 1.529593000000  |
| H  | 2.750840000000  | 3.959377000000  | 3.234768000000  |
| H  | 0.309957000000  | 1.679645000000  | 1.623215000000  |
| H  | 0.524862000000  | 3.150808000000  | 2.585197000000  |
| H  | 0.816500000000  | 3.182885000000  | 0.842558000000  |
| H  | 1.752135000000  | 1.929002000000  | 4.082199000000  |
| H  | 1.814954000000  | 0.412299000000  | 3.186828000000  |
| H  | 3.314344000000  | 1.181135000000  | 3.773606000000  |
| H  | 3.679963000000  | -0.723196000000 | 3.000359000000  |
| H  | 3.497323000000  | -1.638236000000 | 1.504717000000  |
| H  | 5.066551000000  | -1.580009000000 | 2.326068000000  |
| H  | 5.888374000000  | 0.413909000000  | -0.564930000000 |
| H  | 6.163687000000  | -1.031128000000 | 0.404358000000  |
| H  | 4.736247000000  | -0.937693000000 | -0.624988000000 |
| H  | 6.476810000000  | 0.451747000000  | 2.296065000000  |
| H  | 5.950618000000  | 1.954378000000  | 1.534556000000  |
| H  | 5.169496000000  | 1.383600000000  | 3.017033000000  |
| P  | -3.708288000000 | 0.044124000000  | 0.043476000000  |
| C  | -4.431988000000 | 1.090317000000  | 1.478754000000  |
| C  | -4.579827000000 | 0.597311000000  | -1.589541000000 |
| C  | -4.203189000000 | -1.810863000000 | 0.337549000000  |
| C  | -5.855348000000 | 0.696174000000  | 1.915143000000  |
| C  | -3.481435000000 | 0.974190000000  | 2.685769000000  |
| C  | -4.477127000000 | 2.582099000000  | 1.101902000000  |

|   |                 |                 |                 |
|---|-----------------|-----------------|-----------------|
| C | -4.116758000000 | 1.977247000000  | -2.112271000000 |
| C | -4.203607000000 | -0.399800000000 | -2.702011000000 |
| C | -6.115811000000 | 0.693555000000  | -1.473554000000 |
| C | -4.029337000000 | -2.222787000000 | 1.811577000000  |
| C | -5.646101000000 | -2.184648000000 | -0.048480000000 |
| C | -3.232422000000 | -2.700085000000 | -0.467819000000 |
| H | -6.580470000000 | 0.757770000000  | 1.101438000000  |
| H | -5.909194000000 | -0.303000000000 | 2.346768000000  |
| H | -6.179699000000 | 1.398817000000  | 2.693050000000  |
| H | -2.488991000000 | 1.373704000000  | 2.453347000000  |
| H | -3.899520000000 | 1.558970000000  | 3.515112000000  |
| H | -3.341538000000 | -0.048464000000 | 3.035174000000  |
| H | -4.695419000000 | 3.154462000000  | 2.011916000000  |
| H | -3.526394000000 | 2.943577000000  | 0.707133000000  |
| H | -5.264422000000 | 2.811714000000  | 0.380471000000  |
| H | -4.093301000000 | 2.760792000000  | -1.359284000000 |
| H | -3.136489000000 | 1.928803000000  | -2.578203000000 |
| H | -4.832239000000 | 2.285543000000  | -2.885113000000 |
| H | -4.675652000000 | -1.377091000000 | -2.589421000000 |
| H | -4.537532000000 | 0.014200000000  | -3.661383000000 |
| H | -3.118409000000 | -0.536074000000 | -2.762524000000 |
| H | -6.526762000000 | 0.802866000000  | -2.484939000000 |
| H | -6.593845000000 | -0.171660000000 | -1.021795000000 |
| H | -6.416398000000 | 1.582671000000  | -0.912757000000 |
| H | -3.039498000000 | -1.987767000000 | 2.199498000000  |
| H | -4.784978000000 | -1.794974000000 | 2.472241000000  |
| H | -4.139190000000 | -3.312967000000 | 1.864415000000  |
| H | -5.844326000000 | -2.105764000000 | -1.118627000000 |
| H | -5.797828000000 | -3.235799000000 | 0.224910000000  |
| H | -6.393627000000 | -1.601517000000 | 0.495131000000  |
| H | -3.563713000000 | -3.742140000000 | -0.377069000000 |
| H | -3.191291000000 | -2.459285000000 | -1.531015000000 |
| H | -2.219322000000 | -2.642397000000 | -0.063665000000 |
| C | -1.164237000000 | 1.534387000000  | -1.210659000000 |
| C | -1.279787000000 | 2.843620000000  | -0.735440000000 |
| C | -0.770458000000 | 1.338972000000  | -2.539400000000 |
| C | -1.037724000000 | 3.934155000000  | -1.569279000000 |
| C | -0.522005000000 | 2.431089000000  | -3.371405000000 |
| C | -0.668026000000 | 3.732163000000  | -2.895904000000 |
| H | -1.551332000000 | 3.024095000000  | 0.300078000000  |
| H | -0.656496000000 | 0.336687000000  | -2.936325000000 |
| H | -1.139374000000 | 4.942207000000  | -1.175806000000 |
| H | -0.219831000000 | 2.257638000000  | -4.400882000000 |
| H | -0.483239000000 | 4.579184000000  | -3.549840000000 |
| I | -0.368757000000 | -1.479765000000 | 2.242025000000  |

|                                              |                             |
|----------------------------------------------|-----------------------------|
| Zero-point correction=                       | 0.942936 (Hartree/Particle) |
| Thermal correction to Energy=                | 0.996906                    |
| Thermal correction to Enthalpy=              | 0.997850                    |
| Thermal correction to Gibbs Free Energy=     | 0.858335                    |
| Sum of electronic and zero-point Energies=   | -4930.517759                |
| Sum of electronic and thermal Energies=      | -4930.463790                |
| Sum of electronic and thermal Enthalpies=    | -4930.462846                |
| Sum of electronic and thermal Free Energies= | -4930.602361                |

CPCM (Toluene) M06/def2TZVP E = -5220.28706631

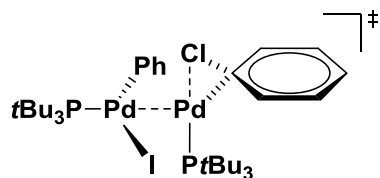

|   |                |                 |                 |
|---|----------------|-----------------|-----------------|
| C | 4.527298000000 | -3.310358000000 | -2.480059000000 |
| C | 2.985395000000 | -1.494316000000 | -2.910027000000 |
| C | 2.221996000000 | -1.911324000000 | -1.814991000000 |



|    |                 |                 |                 |
|----|-----------------|-----------------|-----------------|
| C  | 2.548651000000  | -3.071356000000 | -1.105174000000 |
| H  | 1.896166000000  | -3.422490000000 | -0.311745000000 |
| H  | 2.675445000000  | -0.635129000000 | -3.493294000000 |
| C  | 3.724589000000  | -3.744371000000 | -1.427575000000 |
| C  | 4.146726000000  | -2.192012000000 | -3.222941000000 |
| H  | 4.001611000000  | -4.625719000000 | -0.856288000000 |
| H  | 4.757329000000  | -1.856921000000 | -4.056698000000 |
| Pd | 1.500131000000  | -0.467187000000 | -0.446148000000 |
| Pd | -1.333702000000 | 0.003255000000  | 0.087203000000  |
| Cl | 0.195852000000  | -1.643286000000 | -2.080642000000 |
| H  | 5.434395000000  | -3.849808000000 | -2.733670000000 |
| H  | 2.667106000000  | 4.054016000000  | -1.417890000000 |
| C  | 2.478732000000  | 3.372911000000  | -0.578575000000 |
| C  | 3.616846000000  | 2.339515000000  | -0.522154000000 |
| H  | 1.513654000000  | 2.892633000000  | -0.760817000000 |
| H  | 2.404896000000  | 3.986352000000  | 0.321816000000  |
| P  | 3.115756000000  | 0.916811000000  | 0.665153000000  |
| C  | 4.934070000000  | 3.063727000000  | -0.203034000000 |
| C  | 3.694966000000  | 1.767564000000  | -1.952407000000 |
| C  | 2.487104000000  | 1.703756000000  | 2.301443000000  |
| C  | 4.684530000000  | -0.104778000000 | 1.087184000000  |
| H  | 5.805001000000  | 2.416073000000  | -0.330149000000 |
| H  | 5.052356000000  | 3.902055000000  | -0.901991000000 |
| H  | 4.959891000000  | 3.475236000000  | 0.808206000000  |
| H  | 4.416593000000  | 0.958995000000  | -2.067798000000 |
| H  | 2.714297000000  | 1.391243000000  | -2.259198000000 |
| H  | 3.983189000000  | 2.576126000000  | -2.637371000000 |
| C  | 3.296804000000  | 2.908329000000  | 2.809993000000  |
| C  | 1.025897000000  | 2.142890000000  | 2.096031000000  |
| C  | 2.441968000000  | 0.645473000000  | 3.418642000000  |
| C  | 4.241364000000  | -1.450206000000 | 1.698941000000  |
| C  | 5.423905000000  | -0.460970000000 | -0.214121000000 |
| C  | 5.687283000000  | 0.566013000000  | 2.040639000000  |
| H  | 4.352596000000  | 2.675116000000  | 2.965318000000  |
| H  | 3.232792000000  | 3.769724000000  | 2.141397000000  |
| H  | 2.884421000000  | 3.221587000000  | 3.777938000000  |
| H  | 0.396801000000  | 1.288423000000  | 1.824308000000  |
| H  | 0.642651000000  | 2.549536000000  | 3.041781000000  |
| H  | 0.904481000000  | 2.908279000000  | 1.332311000000  |
| H  | 1.888630000000  | 1.068865000000  | 4.266145000000  |
| H  | 1.910878000000  | -0.257010000000 | 3.104227000000  |
| H  | 3.432420000000  | 0.374063000000  | 3.789704000000  |
| H  | 3.765974000000  | -1.350114000000 | 2.673150000000  |
| H  | 3.548544000000  | -1.976822000000 | 1.039371000000  |
| H  | 5.130470000000  | -2.081387000000 | 1.827708000000  |
| H  | 5.915782000000  | 0.399643000000  | -0.673703000000 |
| H  | 6.206224000000  | -1.192884000000 | 0.021808000000  |
| H  | 4.757939000000  | -0.922173000000 | -0.946334000000 |
| H  | 6.565409000000  | -0.085814000000 | 2.136833000000  |
| H  | 6.038075000000  | 1.534212000000  | 1.675649000000  |
| H  | 5.281483000000  | 0.704676000000  | 3.044992000000  |
| P  | -3.712952000000 | -0.016592000000 | -0.026589000000 |
| C  | -4.459436000000 | 0.674985000000  | 1.599361000000  |
| C  | -4.576353000000 | 0.878708000000  | -1.506517000000 |
| C  | -4.172490000000 | -1.896313000000 | -0.162701000000 |
| C  | -5.886123000000 | 0.187794000000  | 1.911580000000  |
| C  | -3.528508000000 | 0.293185000000  | 2.765950000000  |
| C  | -4.500670000000 | 2.213202000000  | 1.563272000000  |
| C  | -4.122064000000 | 2.343531000000  | -1.704975000000 |
| C  | -4.187230000000 | 0.155578000000  | -2.810000000000 |
| C  | -6.114250000000 | 0.933759000000  | -1.385414000000 |
| C  | -4.008160000000 | -2.624855000000 | 1.184033000000  |
| C  | -5.605598000000 | -2.190549000000 | -0.643394000000 |
| C  | -3.174951000000 | -2.564456000000 | -1.132634000000 |
| H  | -6.600142000000 | 0.436506000000  | 1.124669000000  |
| H  | -5.939832000000 | -0.885027000000 | 2.096293000000  |
| H  | -6.224533000000 | 0.687839000000  | 2.827733000000  |
| H  | -2.531635000000 | 0.726937000000  | 2.638435000000  |
| H  | -3.958194000000 | 0.689098000000  | 3.694984000000  |
| H  | -3.397698000000 | -0.781422000000 | 2.889569000000  |

|   |                 |                 |                 |
|---|-----------------|-----------------|-----------------|
| H | -4.731822000000 | 2.571197000000  | 2.573959000000  |
| H | -3.542218000000 | 2.648297000000  | 1.273118000000  |
| H | -5.276575000000 | 2.599986000000  | 0.898984000000  |
| H | -4.110904000000 | 2.940023000000  | -0.796130000000 |
| H | -3.138566000000 | 2.407367000000  | -2.162359000000 |
| H | -4.835240000000 | 2.810513000000  | -2.396058000000 |
| H | -4.650519000000 | -0.826224000000 | -2.919567000000 |
| H | -4.522417000000 | 0.769612000000  | -3.654926000000 |
| H | -3.101622000000 | 0.044589000000  | -2.896289000000 |
| H | -6.517020000000 | 1.267681000000  | -2.349788000000 |
| H | -6.587706000000 | -0.016361000000 | -1.149980000000 |
| H | -6.429157000000 | 1.669178000000  | -0.640328000000 |
| H | -3.024332000000 | -2.473296000000 | 1.626234000000  |
| H | -4.775256000000 | -2.361951000000 | 1.914165000000  |
| H | -4.106290000000 | -3.699839000000 | 0.989710000000  |
| H | -5.793048000000 | -1.879202000000 | -1.672215000000 |
| H | -5.747743000000 | -3.277526000000 | -0.610379000000 |
| H | -6.366440000000 | -1.748939000000 | 0.005052000000  |
| H | -3.493896000000 | -3.601930000000 | -1.293669000000 |
| H | -3.116031000000 | -2.082491000000 | -2.108943000000 |
| H | -2.168859000000 | -2.592876000000 | -0.708018000000 |
| C | -1.176397000000 | 1.692238000000  | -0.916176000000 |
| C | -1.267508000000 | 2.898291000000  | -0.216458000000 |
| C | -0.784758000000 | 1.720425000000  | -2.259440000000 |
| C | -1.004152000000 | 4.111919000000  | -0.850011000000 |
| C | -0.515446000000 | 2.935677000000  | -2.889263000000 |
| C | -0.639003000000 | 4.136206000000  | -2.193370000000 |
| H | -1.538164000000 | 2.899980000000  | 0.835220000000  |
| H | -0.690244000000 | 0.797048000000  | -2.819866000000 |
| H | -1.086624000000 | 5.039544000000  | -0.289781000000 |
| H | -0.215115000000 | 2.939495000000  | -3.933782000000 |
| H | -0.440992000000 | 5.081251000000  | -2.690138000000 |
| I | -0.361814000000 | -1.904435000000 | 1.875630000000  |

|                                              |                             |
|----------------------------------------------|-----------------------------|
| Zero-point correction=                       | 0.942265 (Hartree/Particle) |
| Thermal correction to Energy=                | 0.996232                    |
| Thermal correction to Enthalpy=              | 0.997176                    |
| Thermal correction to Gibbs Free Energy=     | 0.857717                    |
| Sum of electronic and zero-point Energies=   | -2819.252426                |
| Sum of electronic and thermal Energies=      | -2819.198458                |
| Sum of electronic and thermal Enthalpies=    | -2819.197514                |
| Sum of electronic and thermal Free Energies= | -2819.336973                |

CPCM (Toluene) M06/def2TZVP E = -3106.40888343

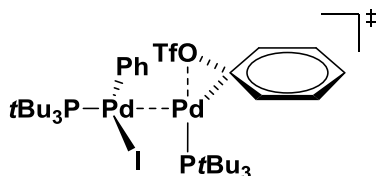

|    |                 |                 |                 |
|----|-----------------|-----------------|-----------------|
| C  | -3.036264000000 | 4.128070000000  | 0.457952000000  |
| C  | -1.632796000000 | 3.109521000000  | -1.251876000000 |
| C  | -1.130590000000 | 2.267774000000  | -0.245183000000 |
| C  | -1.475650000000 | 2.392058000000  | 1.113661000000  |
| H  | -0.876304000000 | 1.922631000000  | 1.888018000000  |
| H  | -1.278815000000 | 3.012759000000  | -2.271263000000 |
| C  | -2.460665000000 | 3.348174000000  | 1.443201000000  |
| C  | -2.620228000000 | 4.003950000000  | -0.882623000000 |
| H  | -2.726924000000 | 3.491298000000  | 2.486790000000  |
| H  | -3.082743000000 | 4.621087000000  | -1.647754000000 |
| Pd | -1.750633000000 | 0.413974000000  | -0.223646000000 |
| Pd | 1.493373000000  | -0.094795000000 | -0.084338000000 |
| O  | 0.803299000000  | 2.106158000000  | -0.297417000000 |
| H  | -3.790165000000 | 4.864252000000  | 0.718174000000  |
| H  | -4.855103000000 | -1.396458000000 | -3.380873000000 |

|   |                 |                 |                 |
|---|-----------------|-----------------|-----------------|
| C | -4.282309000000 | -1.717983000000 | -2.502073000000 |
| C | -4.785201000000 | -0.922525000000 | -1.282517000000 |
| H | -3.225893000000 | -1.522814000000 | -2.709826000000 |
| H | -4.433359000000 | -2.794693000000 | -2.398803000000 |
| P | -3.575853000000 | -1.156525000000 | 0.189520000000  |
| C | -6.246332000000 | -1.321942000000 | -1.019636000000 |
| C | -4.737363000000 | 0.559148000000  | -1.719939000000 |
| C | -3.195446000000 | -3.029702000000 | 0.357310000000  |
| C | -4.471447000000 | -0.590543000000 | 1.793455000000  |
| H | -6.734055000000 | -0.673159000000 | -0.288545000000 |
| H | -6.809211000000 | -1.229224000000 | -1.957329000000 |
| H | -6.346582000000 | -2.355450000000 | -0.679218000000 |
| H | -5.001693000000 | 1.265072000000  | -0.932905000000 |
| H | -3.742166000000 | 0.827684000000  | -2.088565000000 |
| H | -5.449087000000 | 0.700165000000  | -2.544066000000 |
| C | -4.397528000000 | -3.979008000000 | 0.226662000000  |
| C | -2.145811000000 | -3.411903000000 | -0.704115000000 |
| C | -2.524386000000 | -3.288027000000 | 1.718738000000  |
| C | -3.412068000000 | -0.373078000000 | 2.894777000000  |
| C | -5.101780000000 | 0.795198000000  | 1.556610000000  |
| C | -5.557394000000 | -1.532193000000 | 2.338964000000  |
| H | -5.190257000000 | -3.761033000000 | 0.945534000000  |
| H | -4.831995000000 | -3.961280000000 | -0.775327000000 |
| H | -4.057351000000 | -5.006450000000 | 0.411215000000  |
| H | -1.268411000000 | -2.765392000000 | -0.649686000000 |
| H | -1.823846000000 | -4.446085000000 | -0.523455000000 |
| H | -2.521585000000 | -3.360082000000 | -1.725227000000 |
| H | -2.099554000000 | -4.299505000000 | 1.714895000000  |
| H | -1.703559000000 | -2.589575000000 | 1.905951000000  |
| H | -3.225115000000 | -3.236197000000 | 2.554837000000  |
| H | -2.932410000000 | -1.295155000000 | 3.223250000000  |
| H | -2.631545000000 | 0.317619000000  | 2.565498000000  |
| H | -3.903747000000 | 0.067173000000  | 3.772204000000  |
| H | -5.970498000000 | 0.764097000000  | 0.896018000000  |
| H | -5.447112000000 | 1.188364000000  | 2.521376000000  |
| H | -4.375105000000 | 1.507894000000  | 1.154726000000  |
| H | -6.040927000000 | -1.052535000000 | 3.199997000000  |
| H | -6.337096000000 | -1.750697000000 | 1.605991000000  |
| H | -5.145987000000 | -2.480572000000 | 2.693662000000  |
| P | 3.141311000000  | -1.741150000000 | 0.094075000000  |
| C | 2.342241000000  | -3.481165000000 | 0.063758000000  |
| C | 4.248550000000  | -1.524071000000 | -1.462113000000 |
| C | 4.310653000000  | -1.612671000000 | 1.612381000000  |
| C | 3.274301000000  | -4.644272000000 | 0.441690000000  |
| C | 1.146745000000  | -3.462404000000 | 1.033009000000  |
| C | 1.748220000000  | -3.772810000000 | -1.326295000000 |
| C | 3.390047000000  | -1.174278000000 | -2.693015000000 |
| C | 5.191100000000  | -0.319201000000 | -1.273364000000 |
| C | 5.087428000000  | -2.769376000000 | -1.806692000000 |
| C | 3.588829000000  | -2.080954000000 | 2.891606000000  |
| C | 5.603059000000  | -2.447373000000 | 1.502270000000  |
| C | 4.716293000000  | -0.121802000000 | 1.803791000000  |
| H | 4.165821000000  | -4.694968000000 | -0.187401000000 |
| H | 3.588916000000  | -4.609446000000 | 1.487055000000  |
| H | 2.723769000000  | -5.583146000000 | 0.303924000000  |
| H | 0.404114000000  | -2.734721000000 | 0.698735000000  |
| H | 0.670683000000  | -4.450853000000 | 1.026164000000  |
| H | 1.417813000000  | -3.228334000000 | 2.063667000000  |
| H | 1.146573000000  | -4.687362000000 | -1.252636000000 |
| H | 1.085219000000  | -2.973412000000 | -1.665882000000 |
| H | 2.509277000000  | -3.948901000000 | -2.088897000000 |
| H | 2.614466000000  | -1.906653000000 | -2.915564000000 |
| H | 2.914975000000  | -0.195956000000 | -2.585801000000 |
| H | 4.056201000000  | -1.119561000000 | -3.563109000000 |
| H | 5.948728000000  | -0.472809000000 | -0.503532000000 |
| H | 5.719392000000  | -0.161689000000 | -2.221384000000 |
| H | 4.639869000000  | 0.599908000000  | -1.056174000000 |
| H | 5.752806000000  | -2.508891000000 | -2.638866000000 |
| H | 5.716557000000  | -3.115482000000 | -0.985738000000 |
| H | 4.470500000000  | -3.605979000000 | -2.141428000000 |

|   |                 |                 |                 |
|---|-----------------|-----------------|-----------------|
| H | 2.650027000000  | -1.552021000000 | 3.059748000000  |
| H | 3.398010000000  | -3.156854000000 | 2.898278000000  |
| H | 4.244325000000  | -1.867581000000 | 3.744366000000  |
| H | 6.272475000000  | -2.086500000000 | 0.719957000000  |
| H | 6.142863000000  | -2.348932000000 | 2.452077000000  |
| H | 5.421295000000  | -3.510739000000 | 1.339656000000  |
| H | 5.798924000000  | 0.000222000000  | 1.702423000000  |
| H | 4.246318000000  | 0.556979000000  | 1.092038000000  |
| H | 4.433727000000  | 0.220835000000  | 2.802469000000  |
| S | 1.783476000000  | 3.033903000000  | -1.029378000000 |
| C | 1.707899000000  | 4.555242000000  | 0.020577000000  |
| F | 2.062490000000  | 4.283605000000  | 1.276382000000  |
| F | 2.543632000000  | 5.464558000000  | -0.471173000000 |
| F | 0.476175000000  | 5.055291000000  | 0.027140000000  |
| O | 3.143868000000  | 2.533512000000  | -0.873312000000 |
| O | 1.316191000000  | 3.445906000000  | -2.337729000000 |
| I | -0.233682000000 | -0.456314000000 | -2.368445000000 |
| C | 1.401314000000  | 0.270579000000  | 1.850804000000  |
| C | 0.416514000000  | -0.413575000000 | 2.566820000000  |
| C | 2.000227000000  | 1.393659000000  | 2.419548000000  |
| C | 0.045747000000  | 0.011719000000  | 3.843664000000  |
| C | 1.623821000000  | 1.818961000000  | 3.692278000000  |
| C | 0.651211000000  | 1.127885000000  | 4.412664000000  |
| H | -0.084158000000 | -1.270766000000 | 2.132584000000  |
| H | 2.731992000000  | 1.964958000000  | 1.862080000000  |
| H | -0.725610000000 | -0.530748000000 | 4.383836000000  |
| H | 2.087098000000  | 2.706585000000  | 4.113903000000  |
| H | 0.363532000000  | 1.462002000000  | 5.405132000000  |

|                                              |                             |
|----------------------------------------------|-----------------------------|
| Zero-point correction=                       | 0.971511 (Hartree/Particle) |
| Thermal correction to Energy=                | 1.031750                    |
| Thermal correction to Enthalpy=              | 1.032694                    |
| Thermal correction to Gibbs Free Energy=     | 0.879383                    |
| Sum of electronic and zero-point Energies=   | -3320.284351                |
| Sum of electronic and thermal Energies=      | -3320.224112                |
| Sum of electronic and thermal Enthalpies=    | -3320.223168                |
| Sum of electronic and thermal Free Energies= | -3320.376478                |
| CPCM (Toluene) M06/def2TZVP E =              | -3607.71396346              |

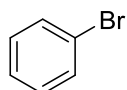

|    |                |                 |                 |
|----|----------------|-----------------|-----------------|
| C  | 0.000000000000 | 0.000000000000  | -0.097553000000 |
| C  | 0.000000000000 | 1.212437000000  | -0.778143000000 |
| C  | 0.000000000000 | -1.212437000000 | -0.778143000000 |
| H  | 0.000000000000 | 2.146853000000  | -0.228040000000 |
| H  | 0.000000000000 | -2.146853000000 | -0.228040000000 |
| C  | 0.000000000000 | 1.204632000000  | -2.170589000000 |
| C  | 0.000000000000 | -1.204632000000 | -2.170589000000 |
| H  | 0.000000000000 | 2.147876000000  | -2.708280000000 |
| H  | 0.000000000000 | -2.147876000000 | -2.708280000000 |
| C  | 0.000000000000 | 0.000000000000  | -2.868384000000 |
| H  | 0.000000000000 | 0.000000000000  | -3.953939000000 |
| Br | 0.000000000000 | 0.000000000000  | 1.800200000000  |

|                                              |                             |
|----------------------------------------------|-----------------------------|
| Zero-point correction=                       | 0.092044 (Hartree/Particle) |
| Thermal correction to Energy=                | 0.097668                    |
| Thermal correction to Enthalpy=              | 0.098613                    |
| Thermal correction to Gibbs Free Energy=     | 0.061883                    |
| Sum of electronic and zero-point Energies=   | -2802.899628                |
| Sum of electronic and thermal Energies=      | -2802.894003                |
| Sum of electronic and thermal Enthalpies=    | -2802.893059                |
| Sum of electronic and thermal Free Energies= | -2802.929789                |
| CPCM (Toluene) M06/def2TZVP E =              | -2805.6085239               |

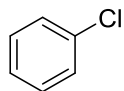

|    |                |                 |                 |
|----|----------------|-----------------|-----------------|
| C  | 0.000000000000 | 0.000000000000  | -2.266574000000 |
| C  | 0.000000000000 | 1.204595000000  | -1.568458000000 |
| C  | 0.000000000000 | -1.204595000000 | -1.568458000000 |
| H  | 0.000000000000 | 2.147716000000  | -2.106331000000 |
| H  | 0.000000000000 | -2.147716000000 | -2.106331000000 |
| C  | 0.000000000000 | 1.213006000000  | -0.176135000000 |
| C  | 0.000000000000 | -1.213006000000 | -0.176135000000 |
| H  | 0.000000000000 | 2.146386000000  | 0.376165000000  |
| H  | 0.000000000000 | -2.146386000000 | 0.376165000000  |
| C  | 0.000000000000 | 0.000000000000  | 0.503964000000  |
| H  | 0.000000000000 | 0.000000000000  | -3.352096000000 |
| Cl | 0.000000000000 | 0.000000000000  | 2.254306000000  |

|                                              |                             |
|----------------------------------------------|-----------------------------|
| Zero-point correction=                       | 0.092364 (Hartree/Particle) |
| Thermal correction to Energy=                | 0.097805                    |
| Thermal correction to Enthalpy=              | 0.098749                    |
| Thermal correction to Gibbs Free Energy=     | 0.063274                    |
| Sum of electronic and zero-point Energies=   | -691.647479                 |
| Sum of electronic and thermal Energies=      | -691.642038                 |
| Sum of electronic and thermal Enthalpies=    | -691.641094                 |
| Sum of electronic and thermal Free Energies= | -691.676568                 |

CPCM (Toluene) M06/def2TZVP E = -691.7377127

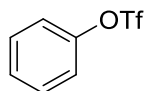

|   |                 |                 |                 |
|---|-----------------|-----------------|-----------------|
| C | 1.457729000000  | 0.080988000000  | -0.388848000000 |
| C | 2.100280000000  | 1.279201000000  | -0.116290000000 |
| C | 2.131244000000  | -1.130081000000 | -0.456697000000 |
| C | 3.476826000000  | 1.260109000000  | 0.087590000000  |
| C | 3.507258000000  | -1.132350000000 | -0.245632000000 |
| C | 4.178589000000  | 0.058199000000  | 0.023409000000  |
| H | 1.527070000000  | 2.198106000000  | -0.066867000000 |
| H | 1.584087000000  | -2.041763000000 | -0.668794000000 |
| H | 3.999085000000  | 2.187647000000  | 0.298897000000  |
| H | 4.053408000000  | -2.068899000000 | -0.294202000000 |
| H | 5.252053000000  | 0.049335000000  | 0.183990000000  |
| O | 0.075940000000  | 0.109912000000  | -0.656288000000 |
| S | -0.901221000000 | -0.254069000000 | 0.584302000000  |
| O | -0.730845000000 | 0.699228000000  | 1.653688000000  |
| O | -0.894649000000 | -1.676236000000 | 0.828532000000  |
| C | -2.446829000000 | 0.169817000000  | -0.342943000000 |
| F | -2.535221000000 | -0.568345000000 | -1.436672000000 |
| F | -3.470788000000 | -0.089140000000 | 0.457678000000  |
| F | -2.441805000000 | 1.453279000000  | -0.662432000000 |

|                                              |                             |
|----------------------------------------------|-----------------------------|
| Zero-point correction=                       | 0.121749 (Hartree/Particle) |
| Thermal correction to Energy=                | 0.133927                    |
| Thermal correction to Enthalpy=              | 0.134871                    |
| Thermal correction to Gibbs Free Energy=     | 0.080229                    |
| Sum of electronic and zero-point Energies=   | -1192.663489                |
| Sum of electronic and thermal Energies=      | -1192.651312                |
| Sum of electronic and thermal Enthalpies=    | -1192.650368                |
| Sum of electronic and thermal Free Energies= | -1192.705010                |

CPCM (Toluene) M06/def2TZVP E = -1193.04300917

## 6. NMR spectra

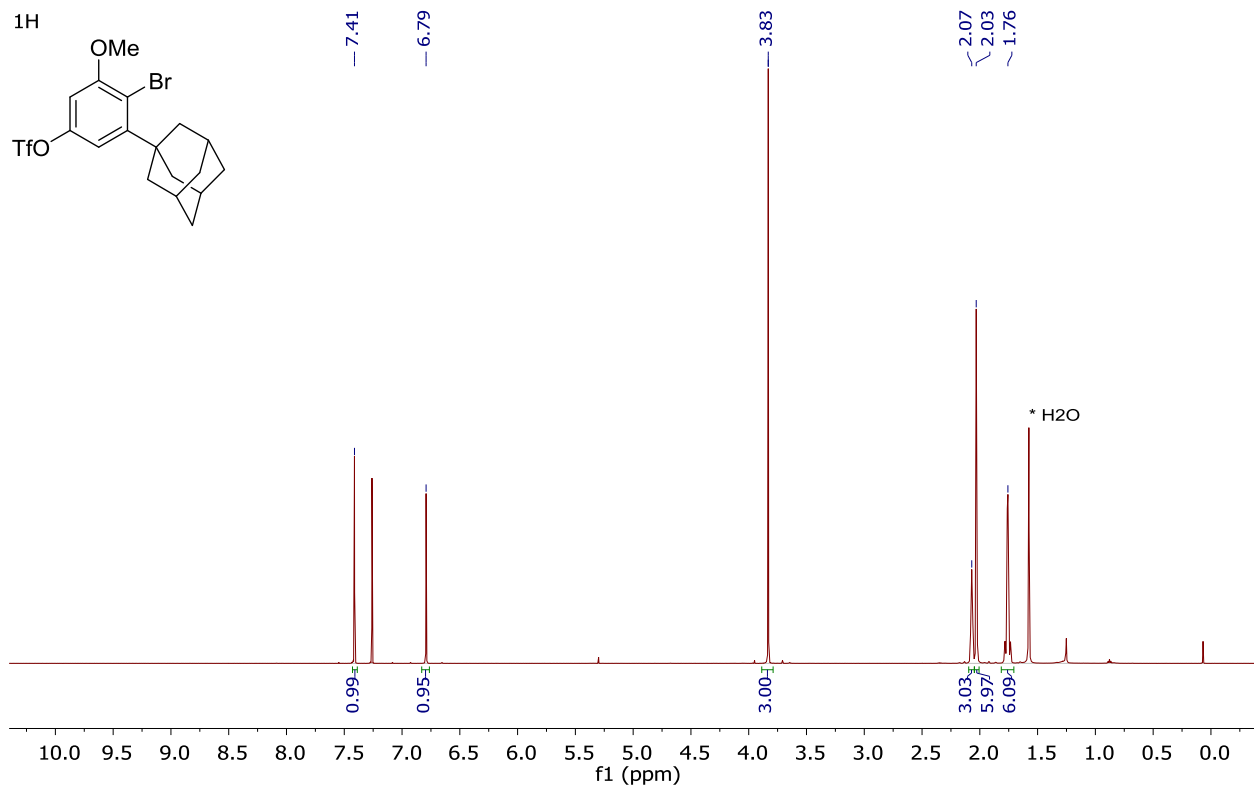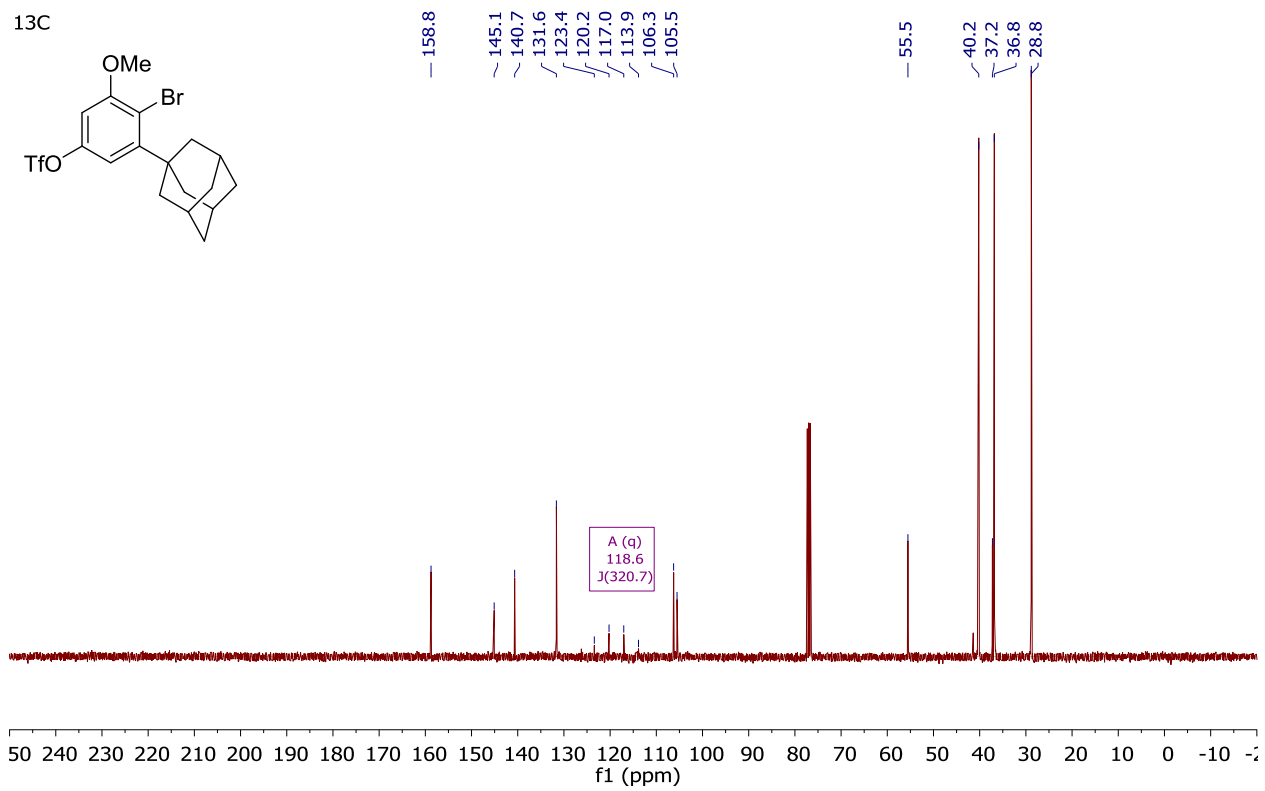

19F

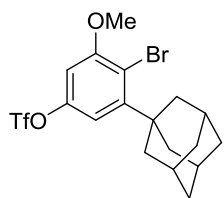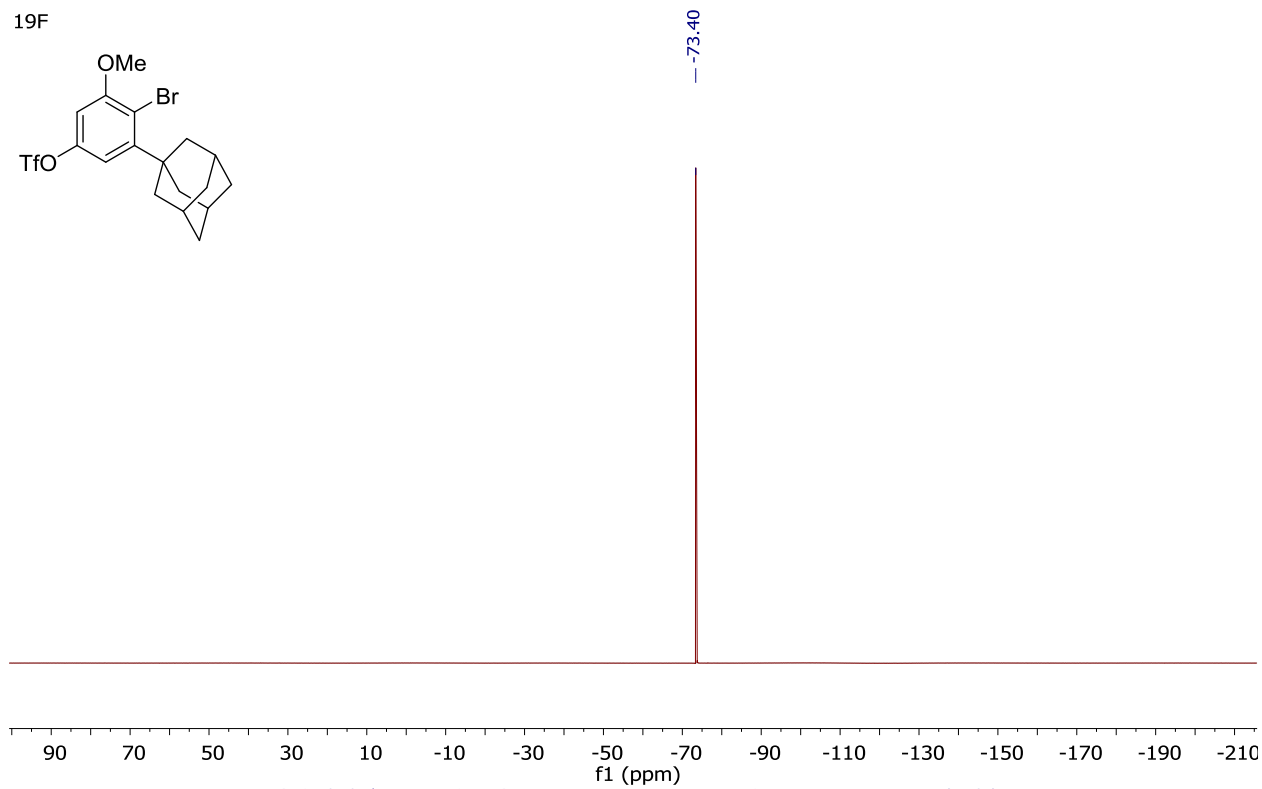

1H

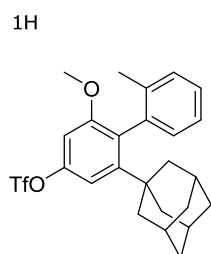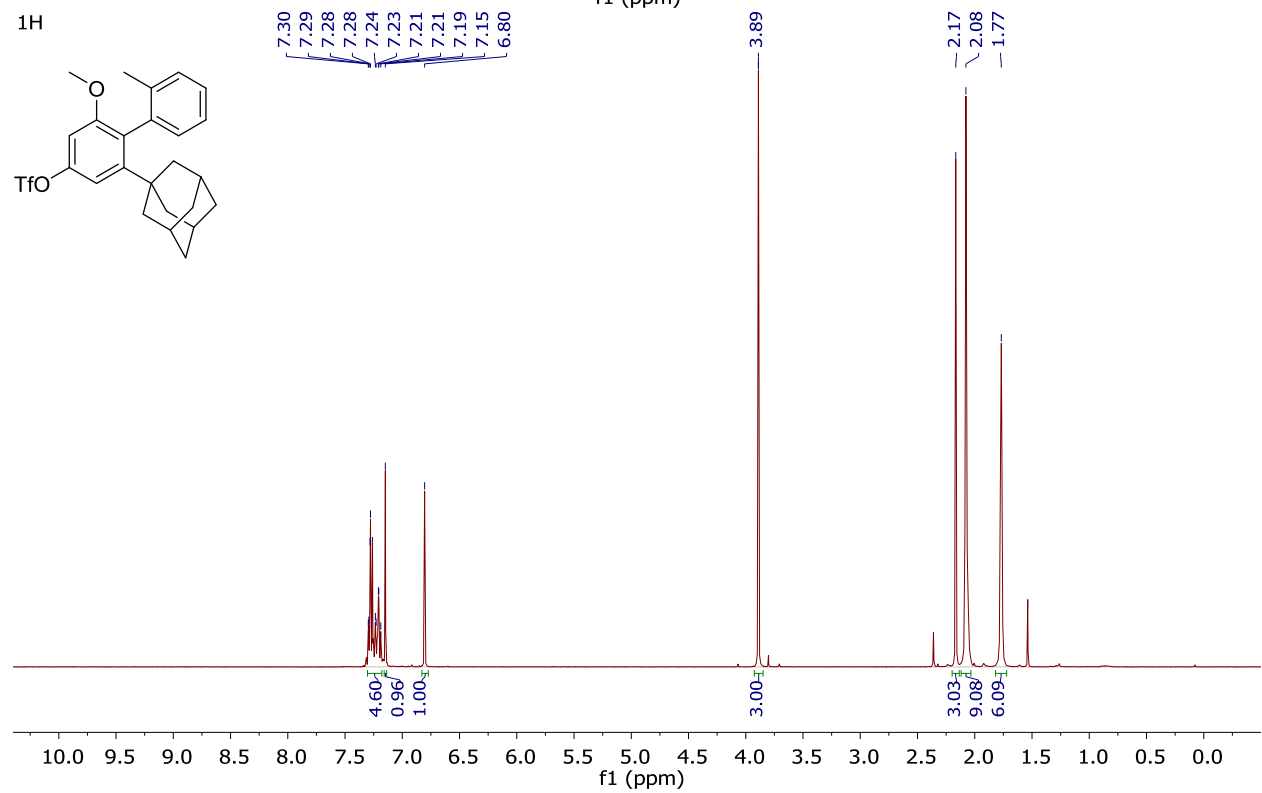

13C

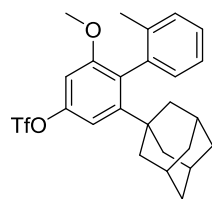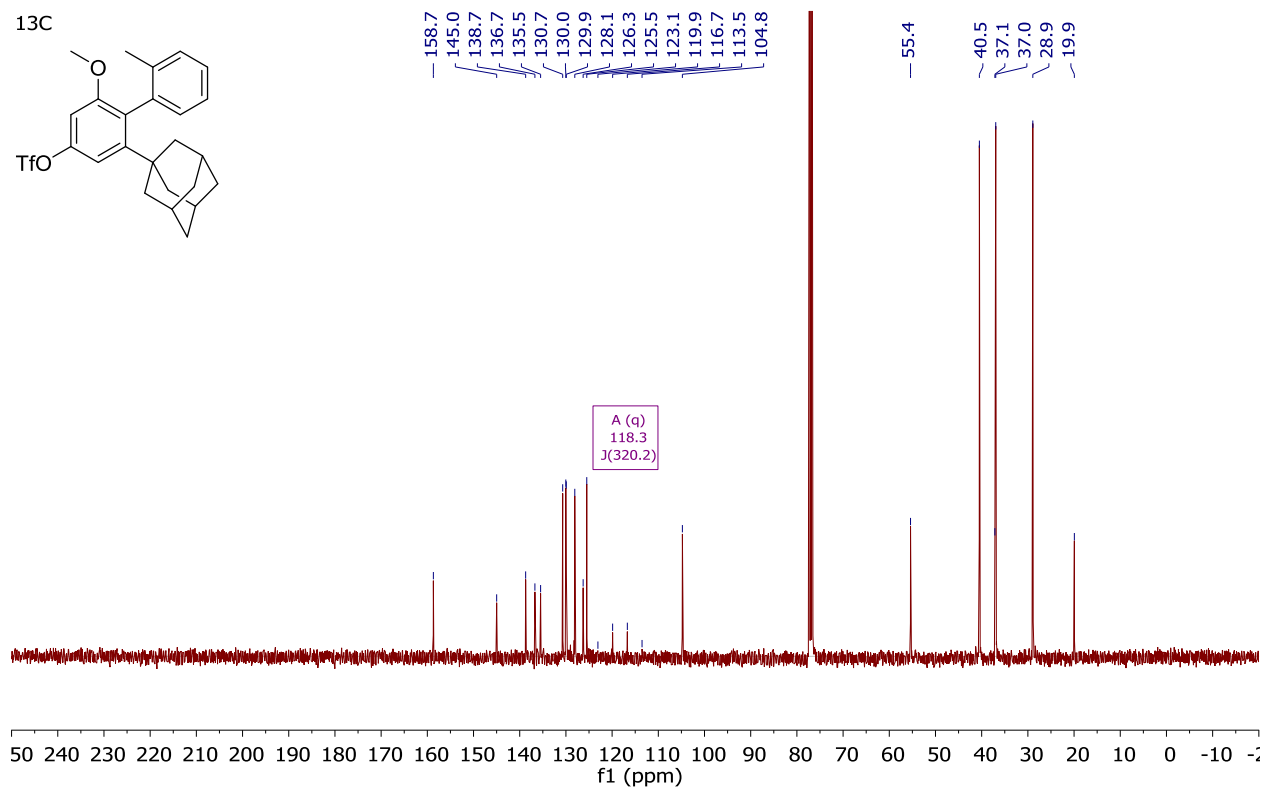

19F

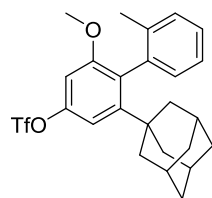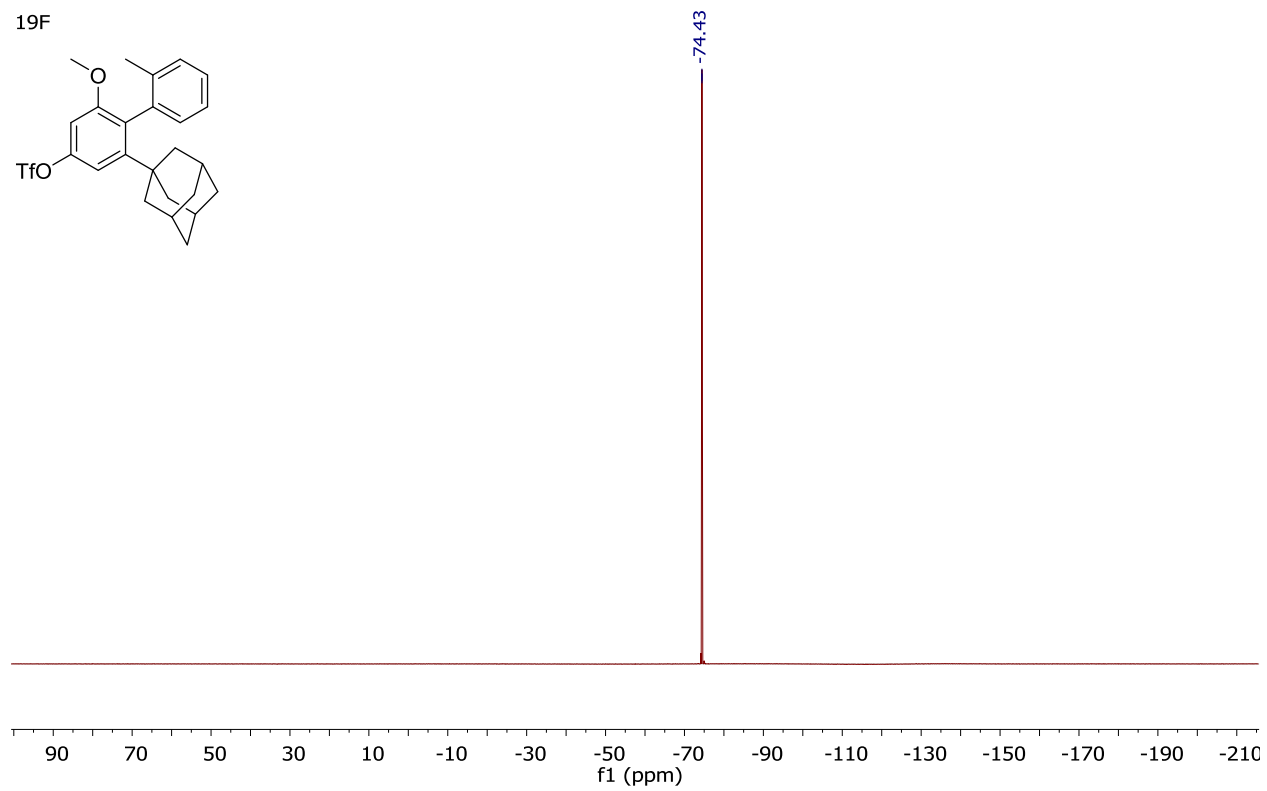



<sup>1</sup>H

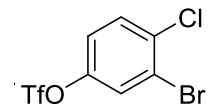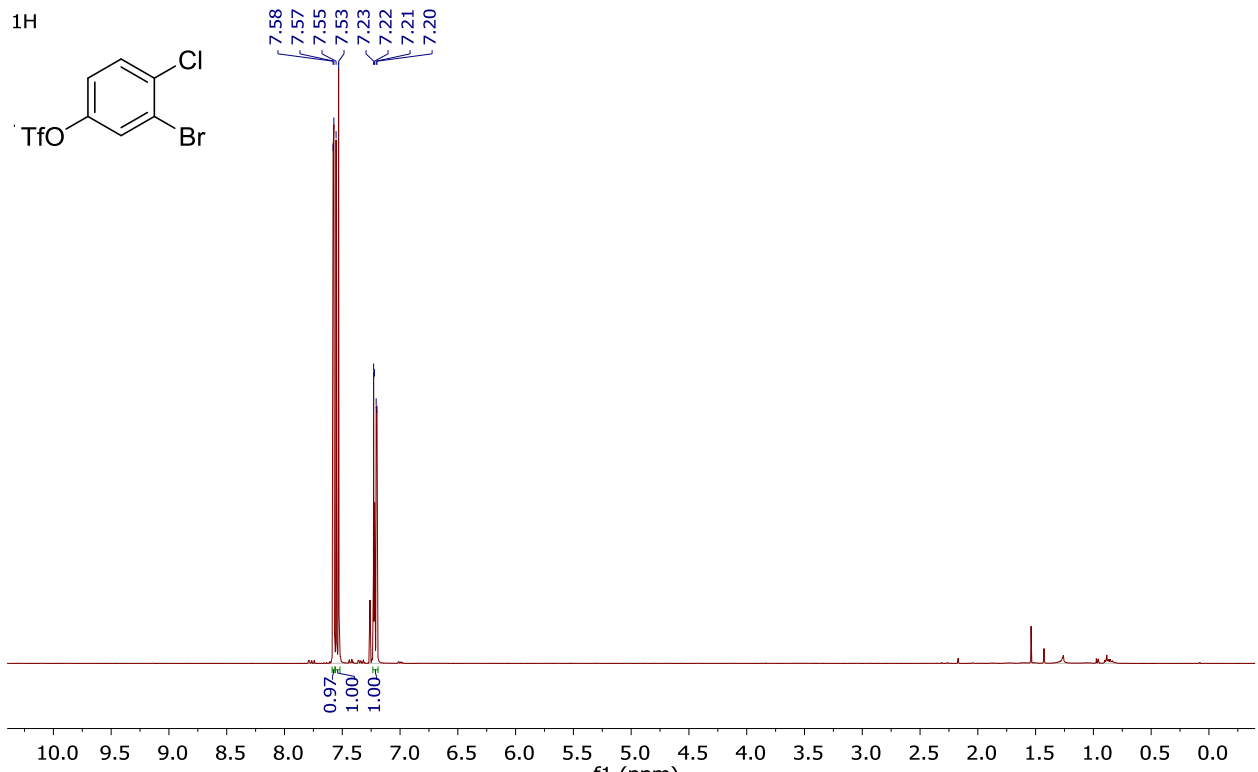

<sup>13</sup>C

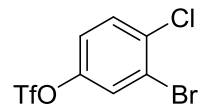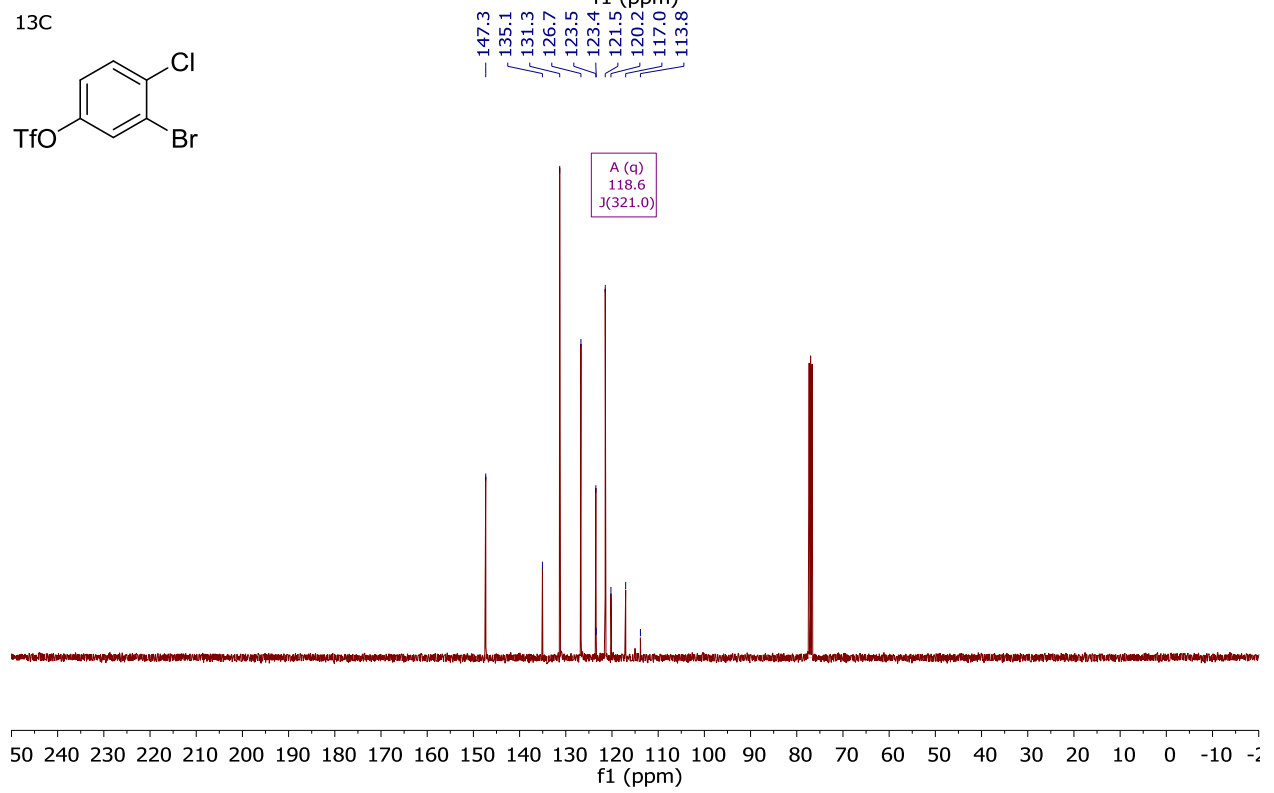

19F

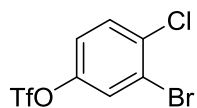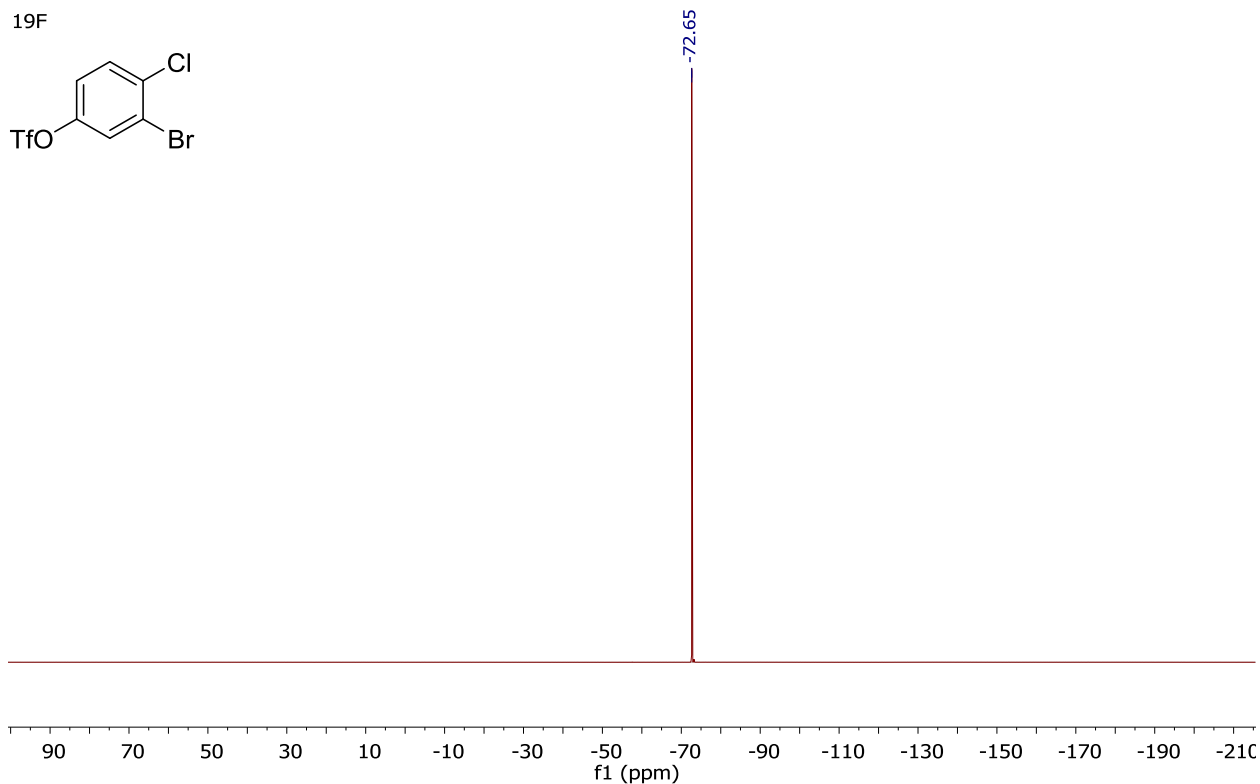

1H

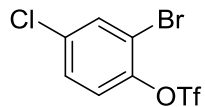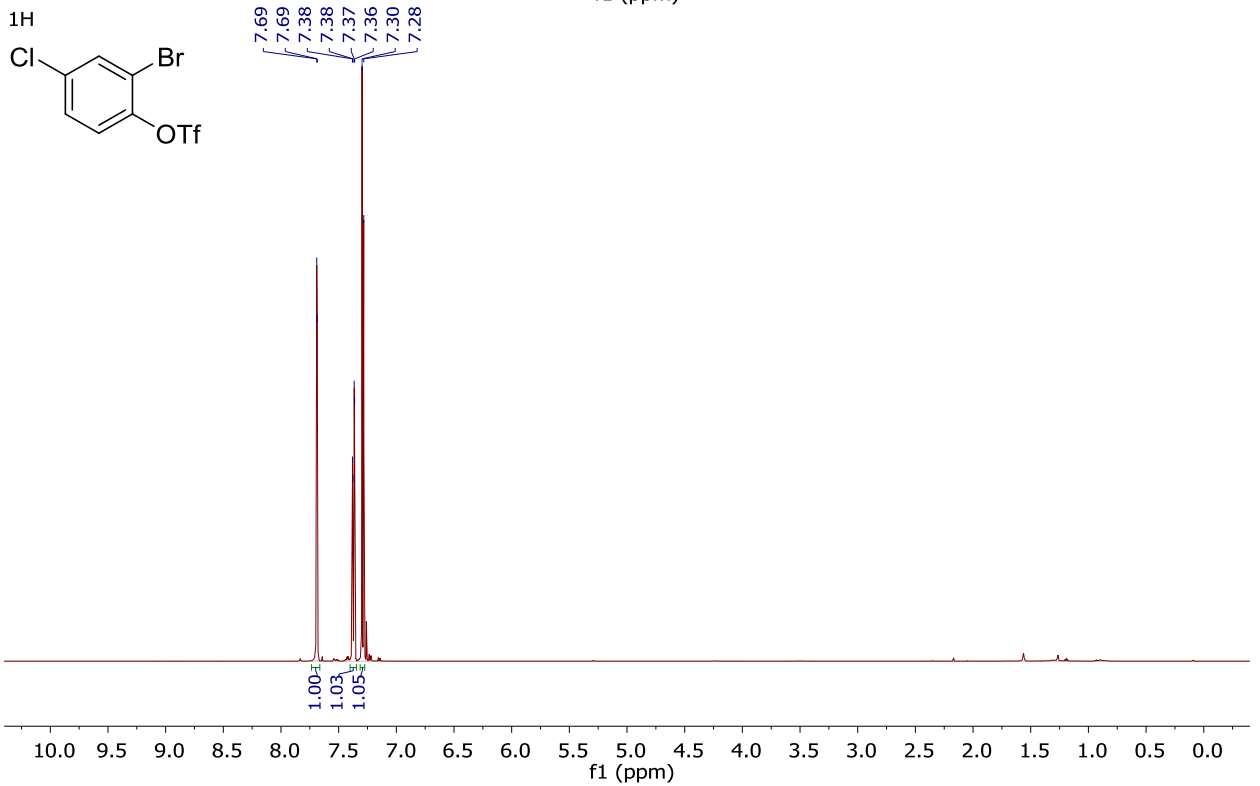

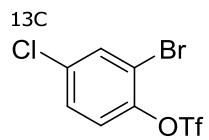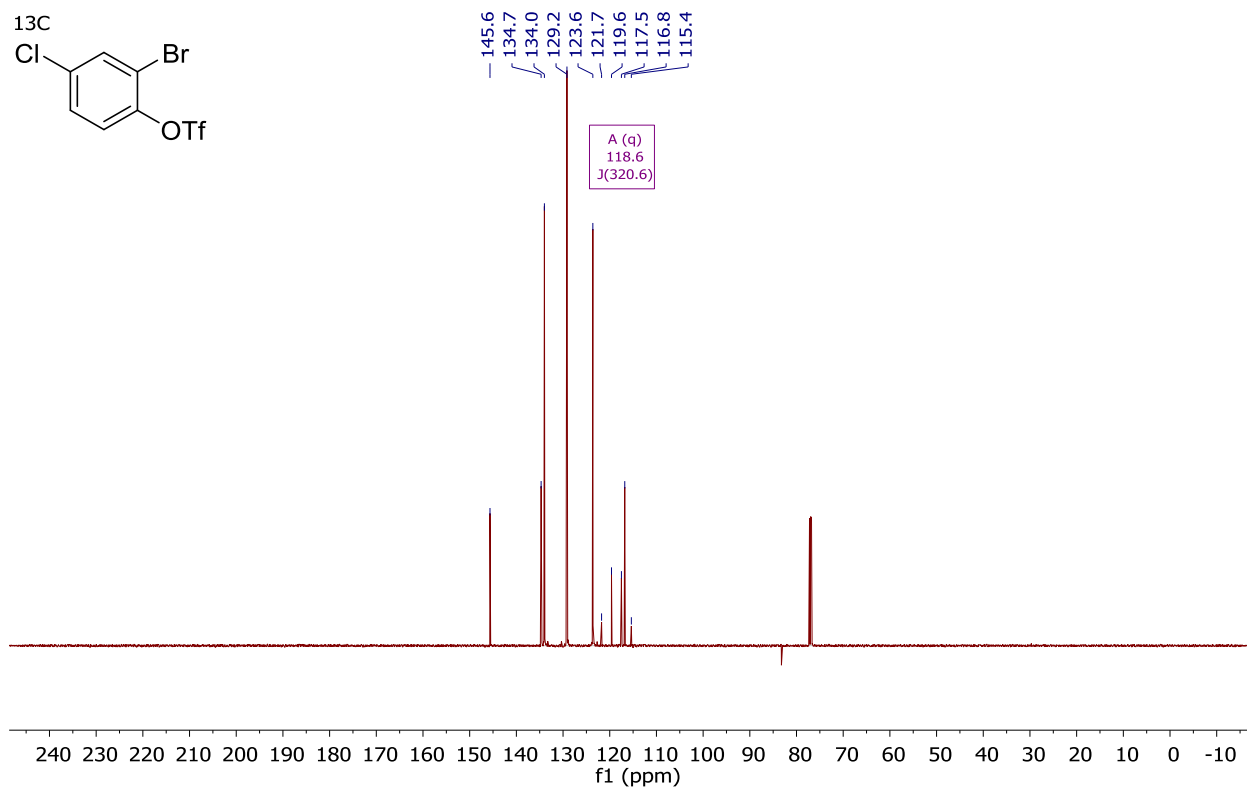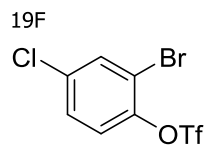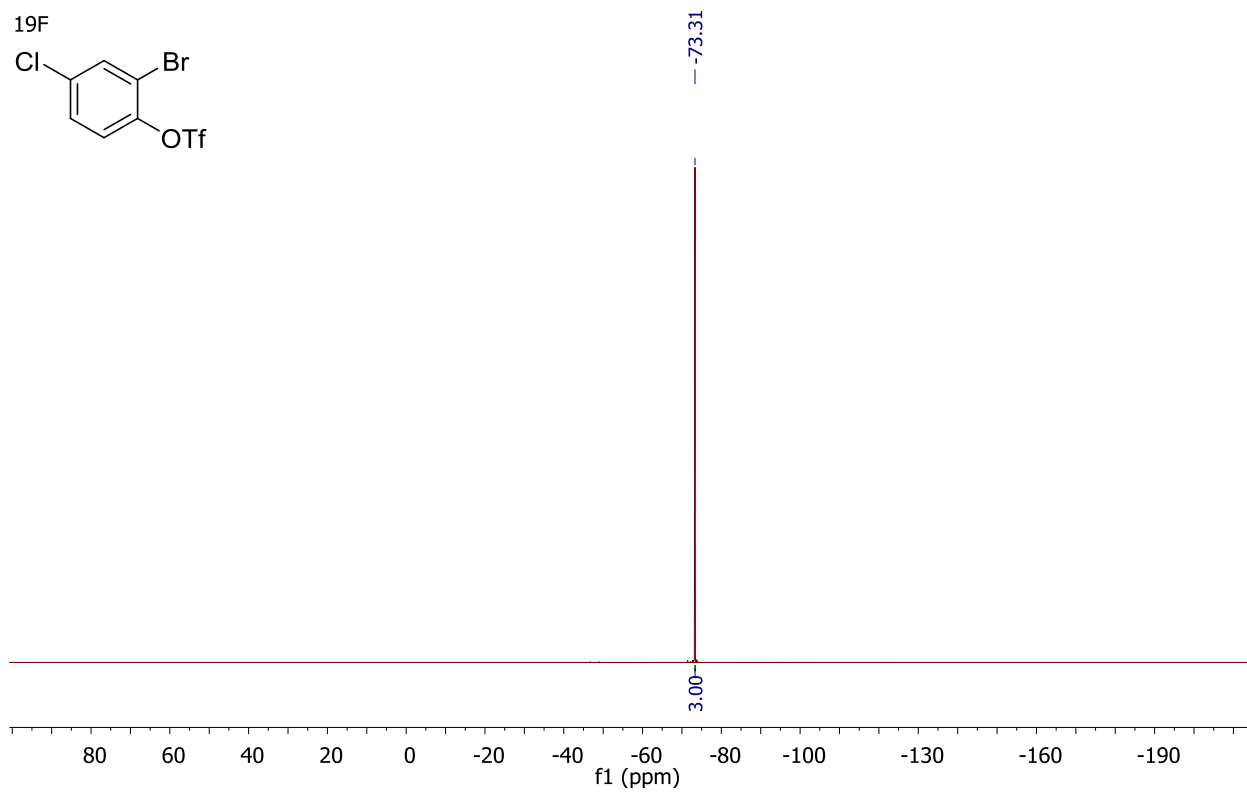

1H

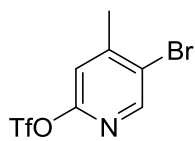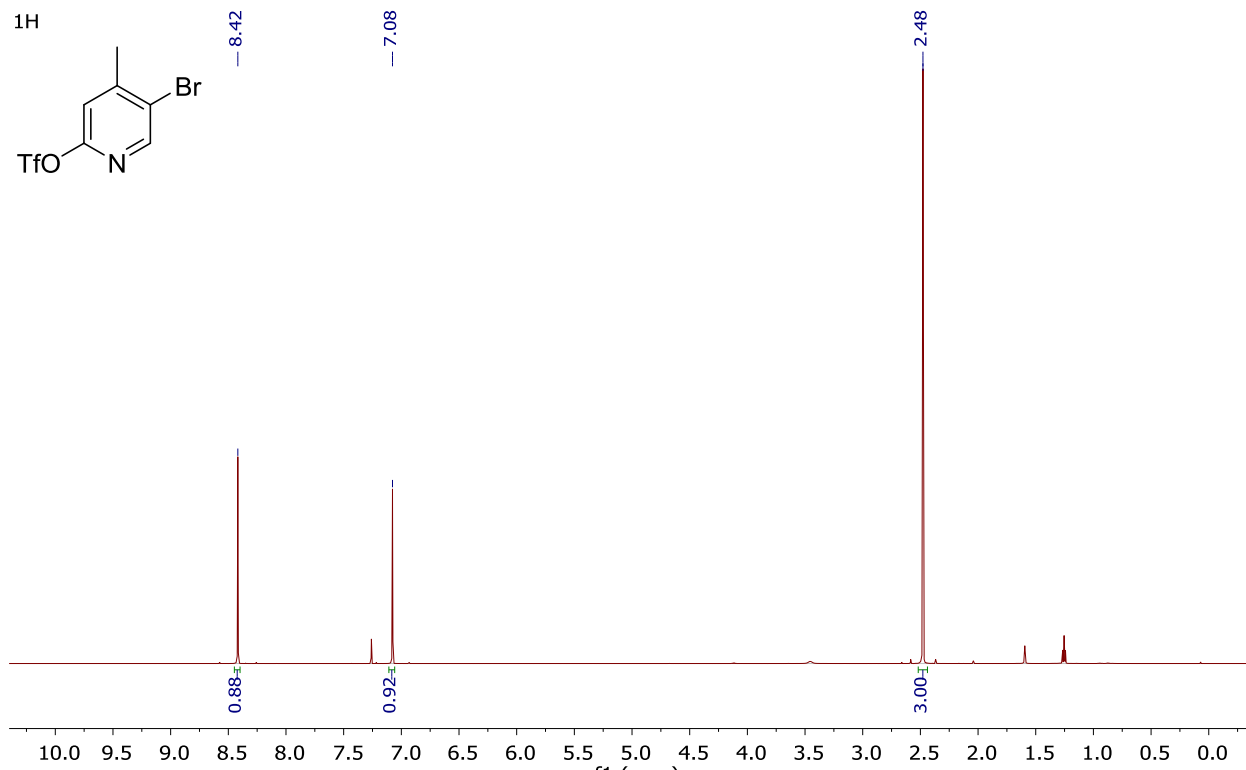

13C

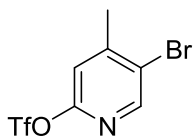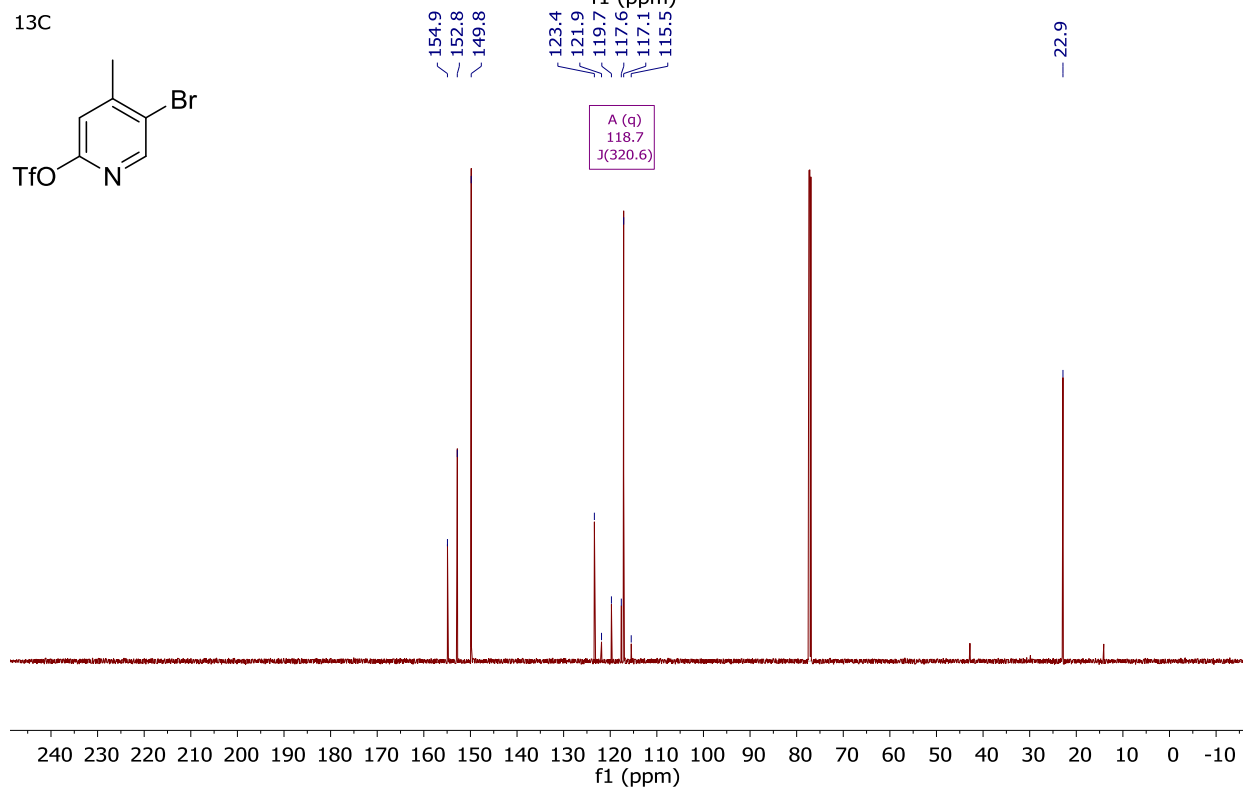

19F

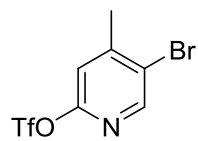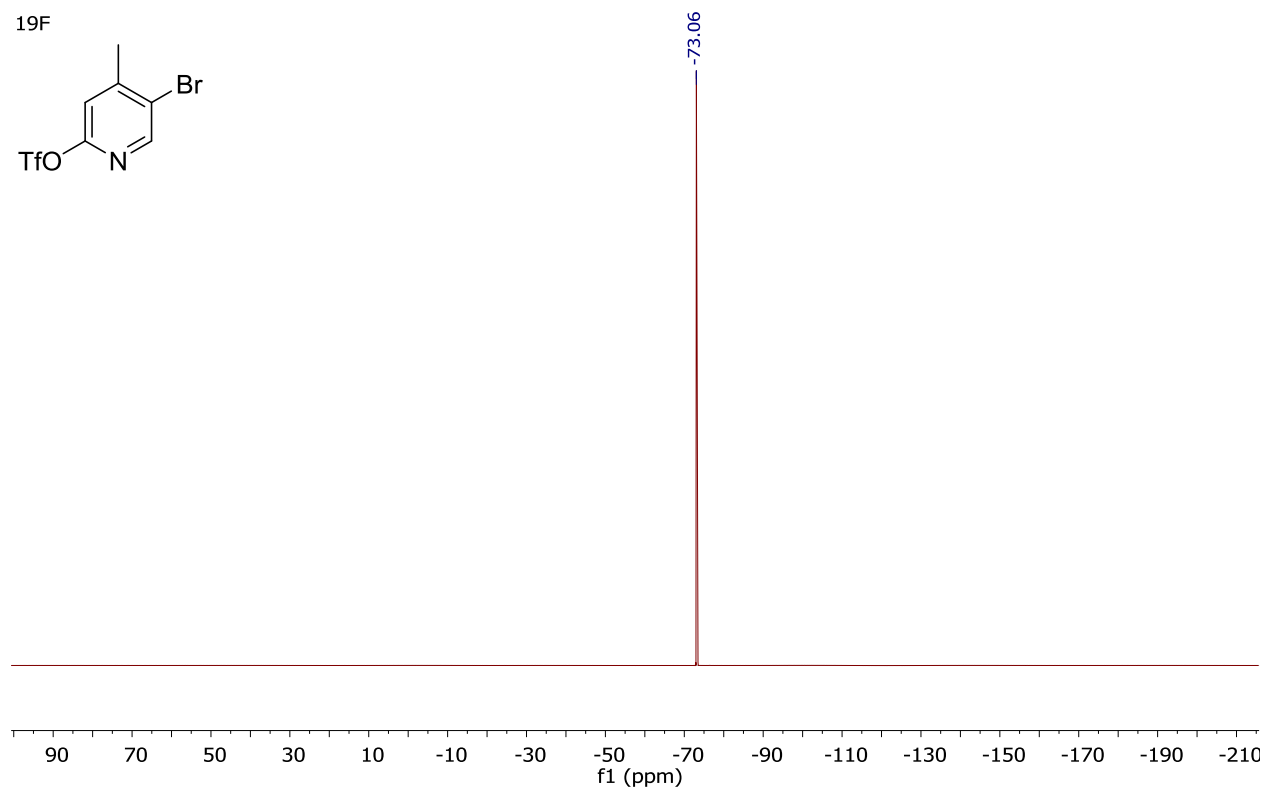

1H

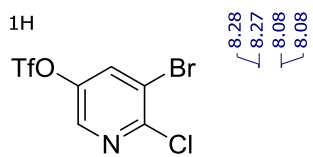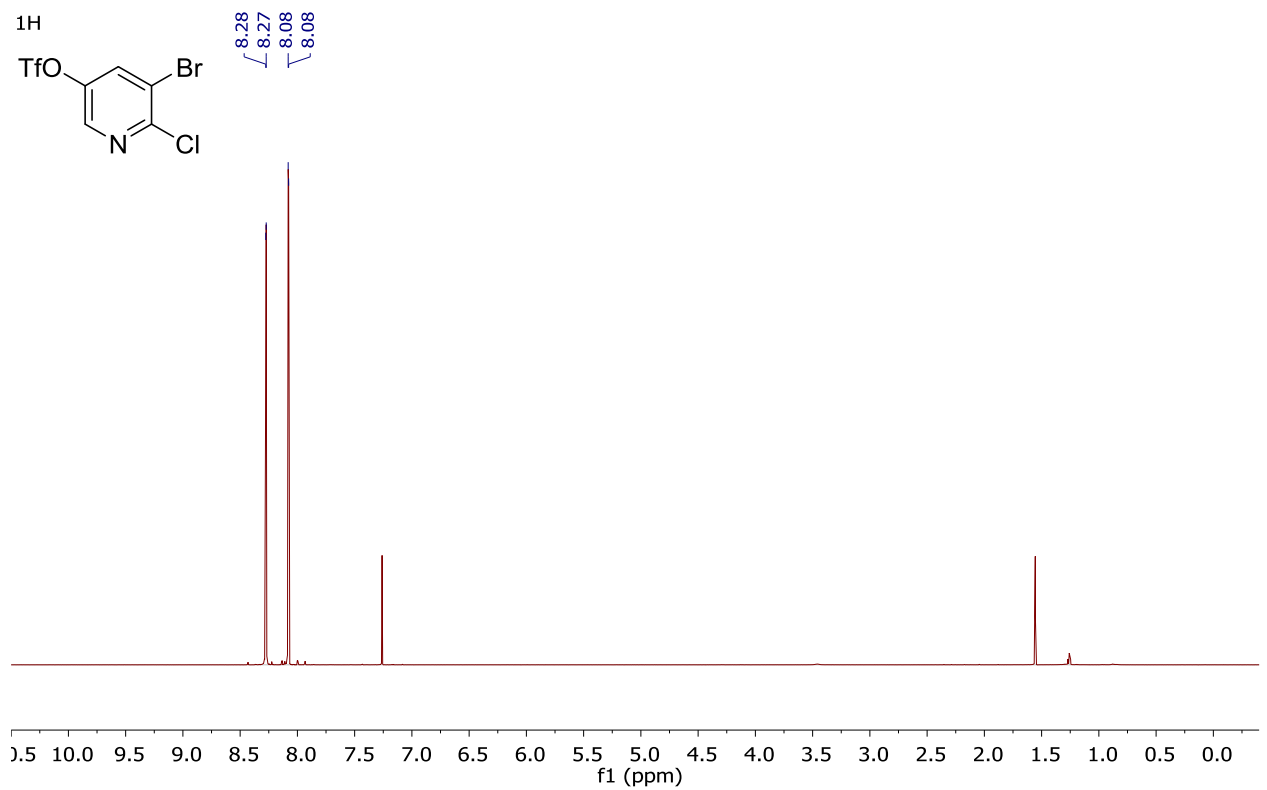

<sup>13</sup>C

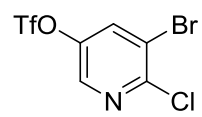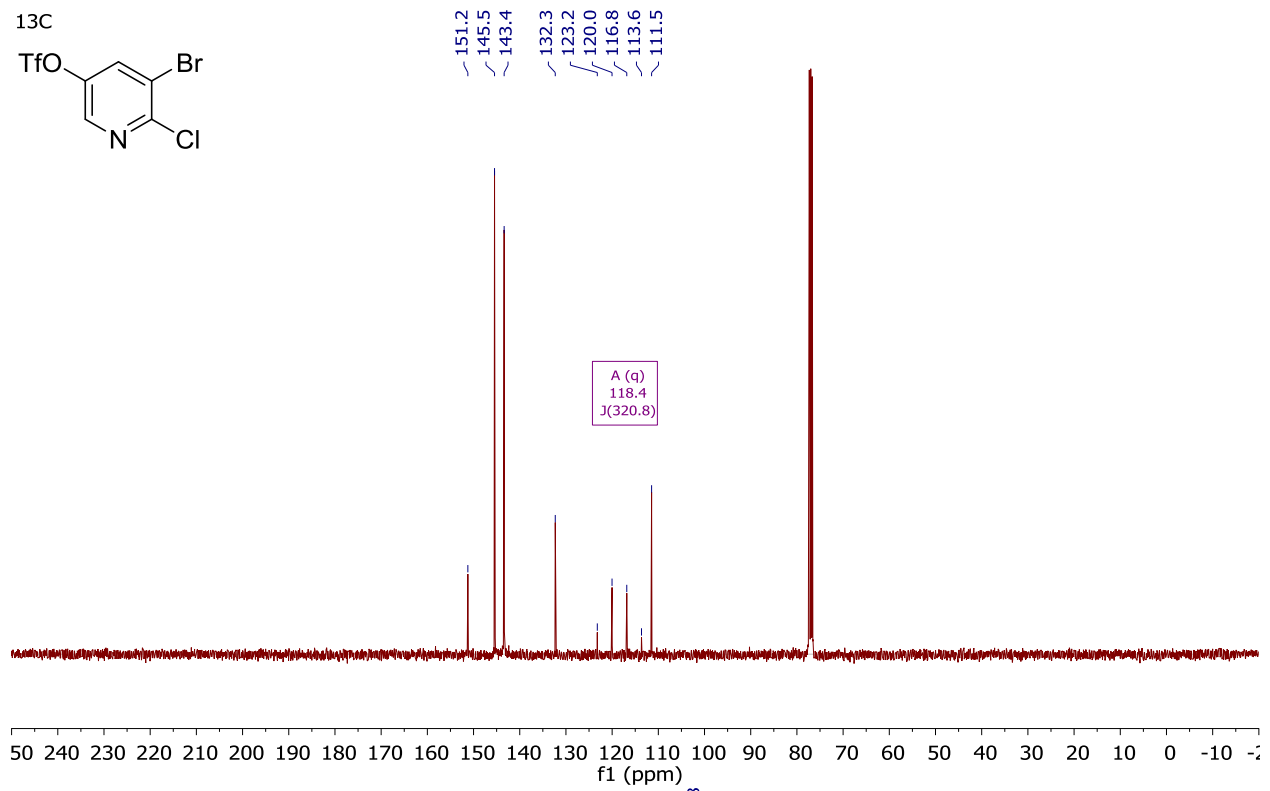

<sup>19</sup>F

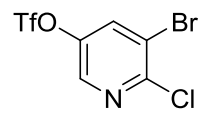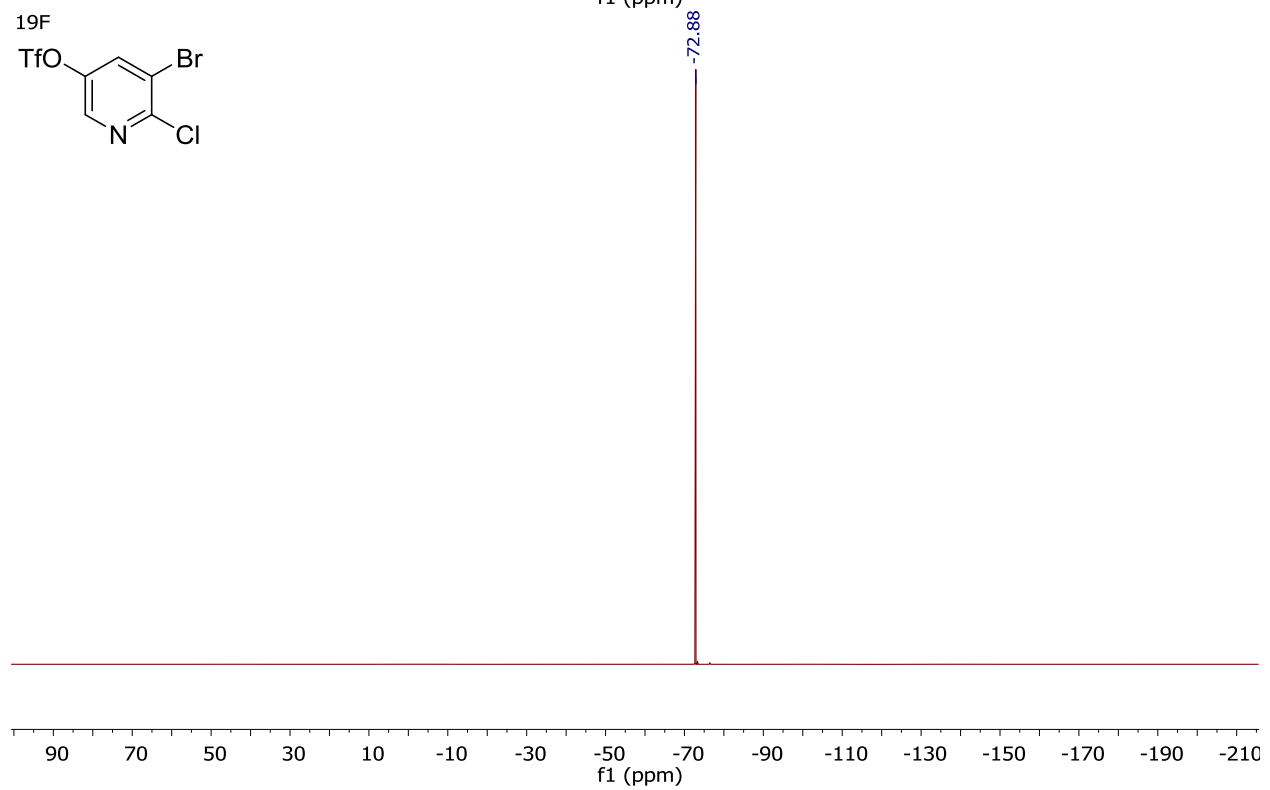

<sup>1</sup>H  
9.09  
9.08  
9.08  
9.08  
8.58  
8.58  
8.57  
8.57  
7.87  
7.86  
7.66  
7.66  
7.66  
7.65  
7.64  
7.52  
7.51

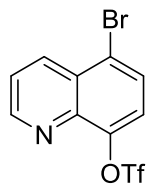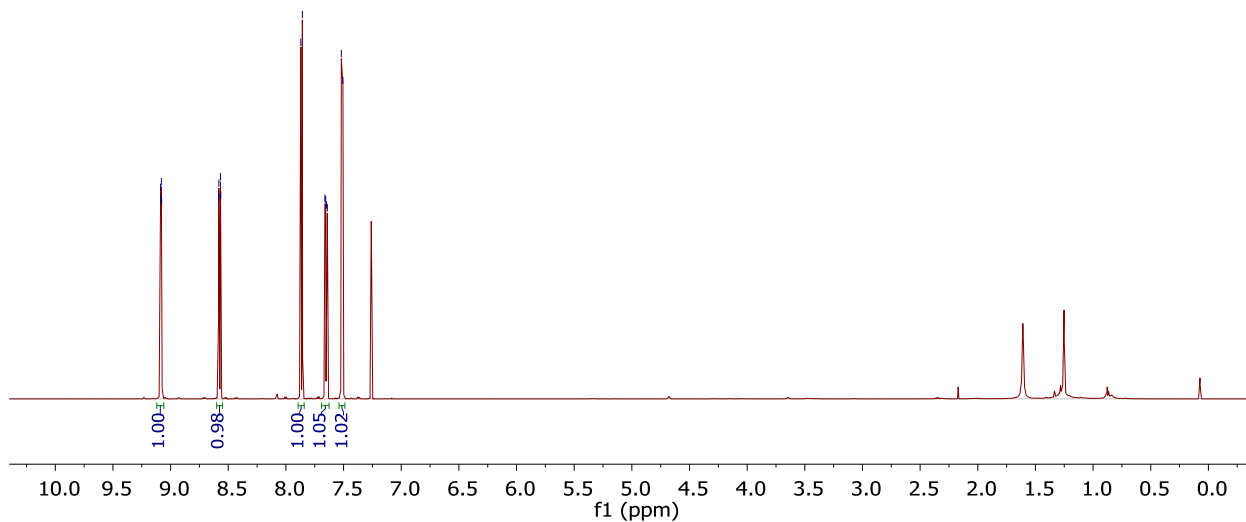

<sup>13</sup>C

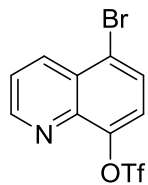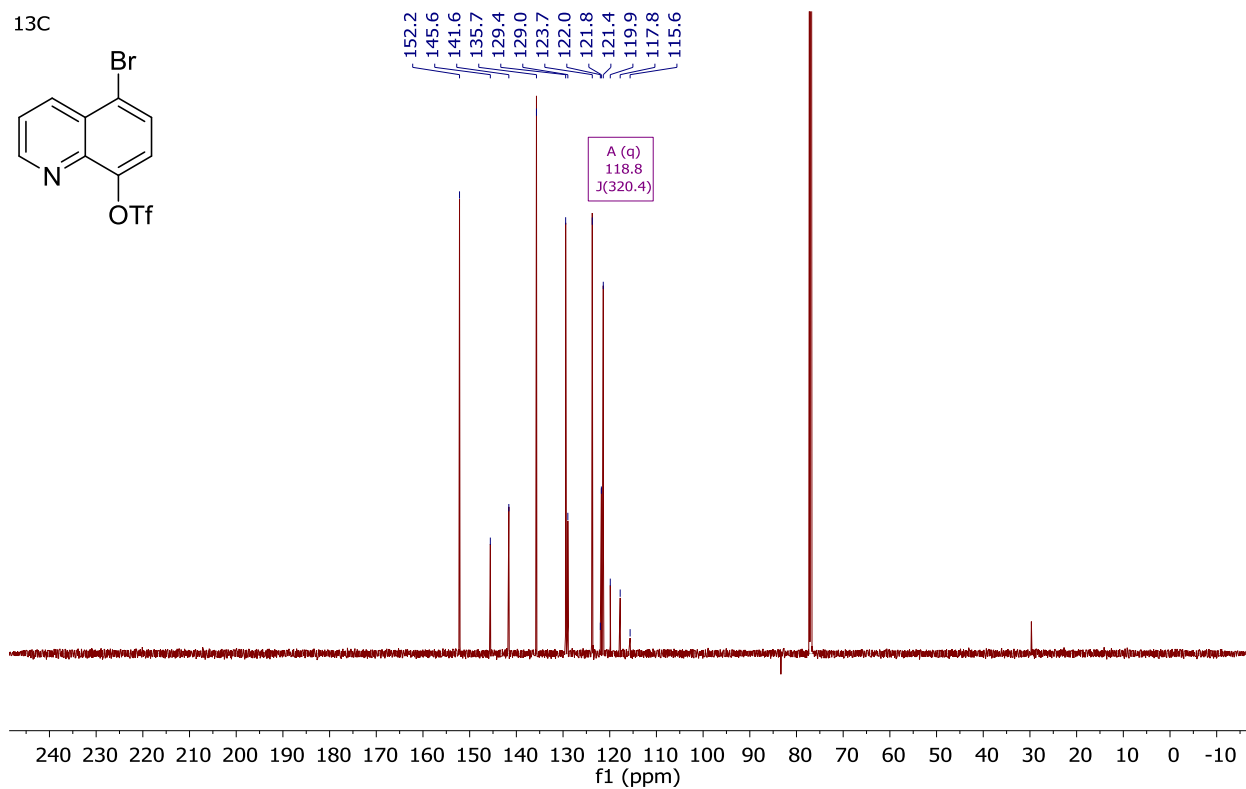

19F

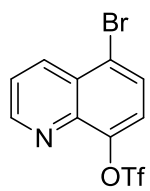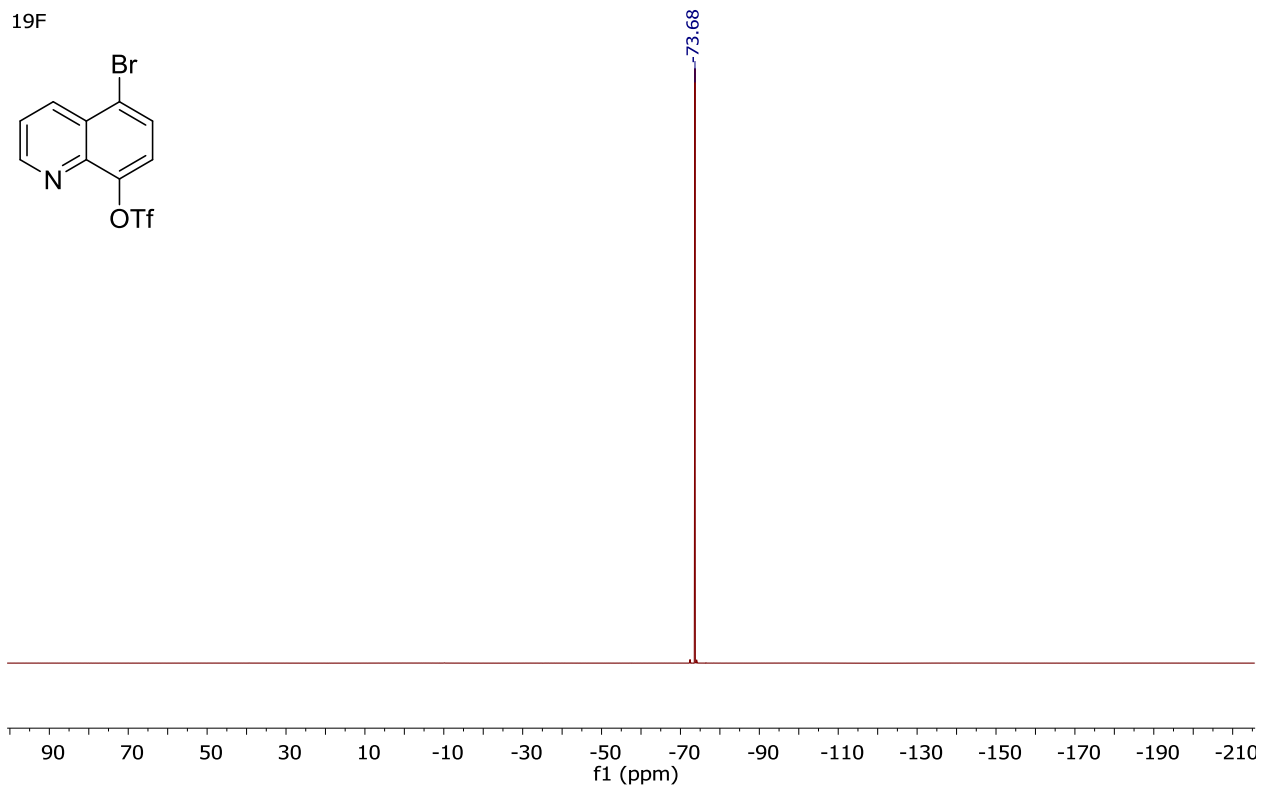

1H

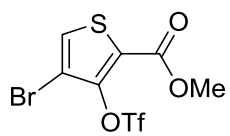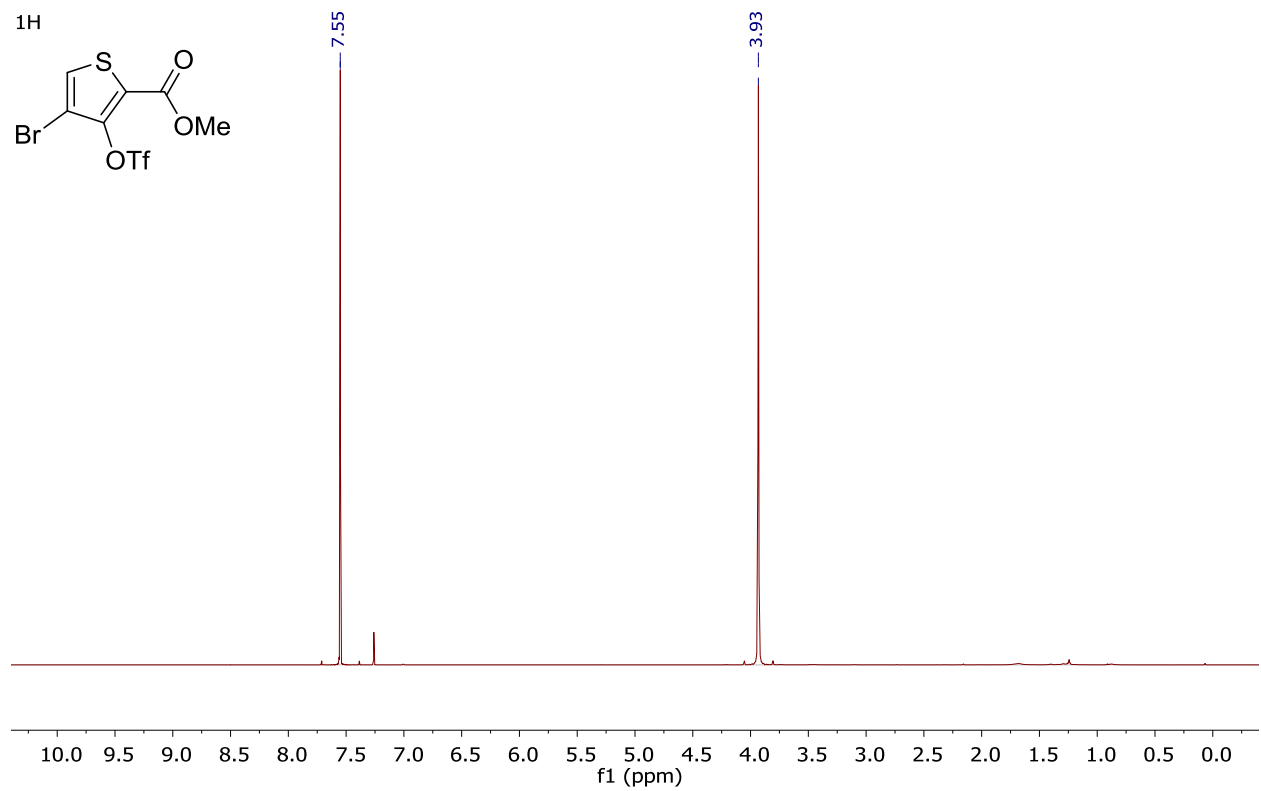



13C

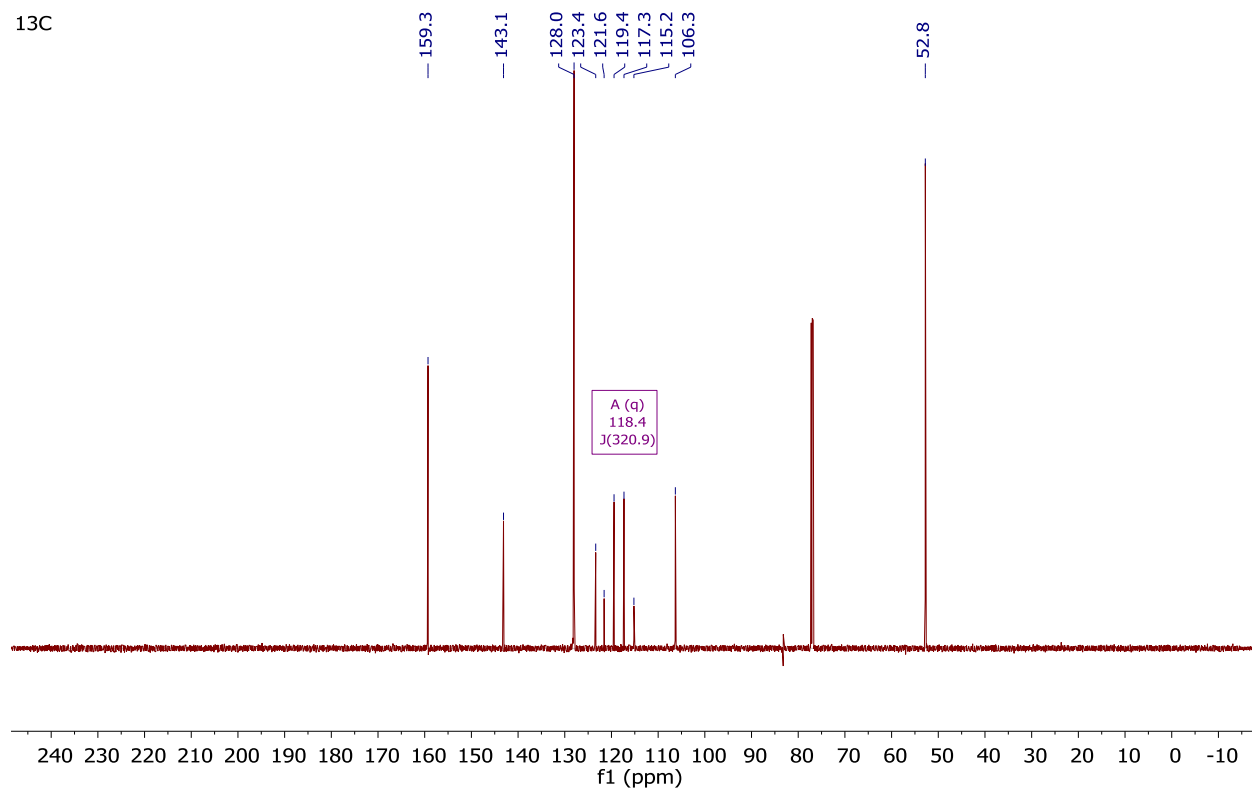

19F

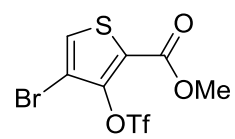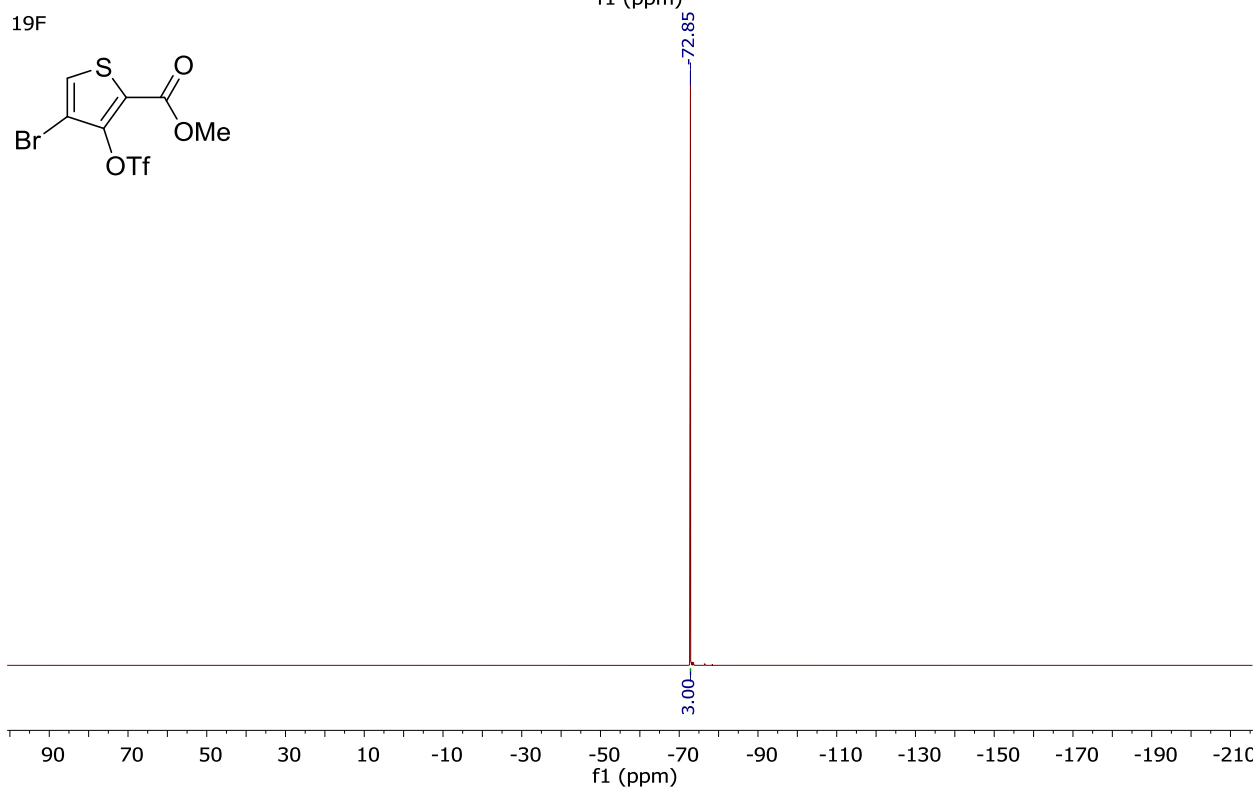

1H

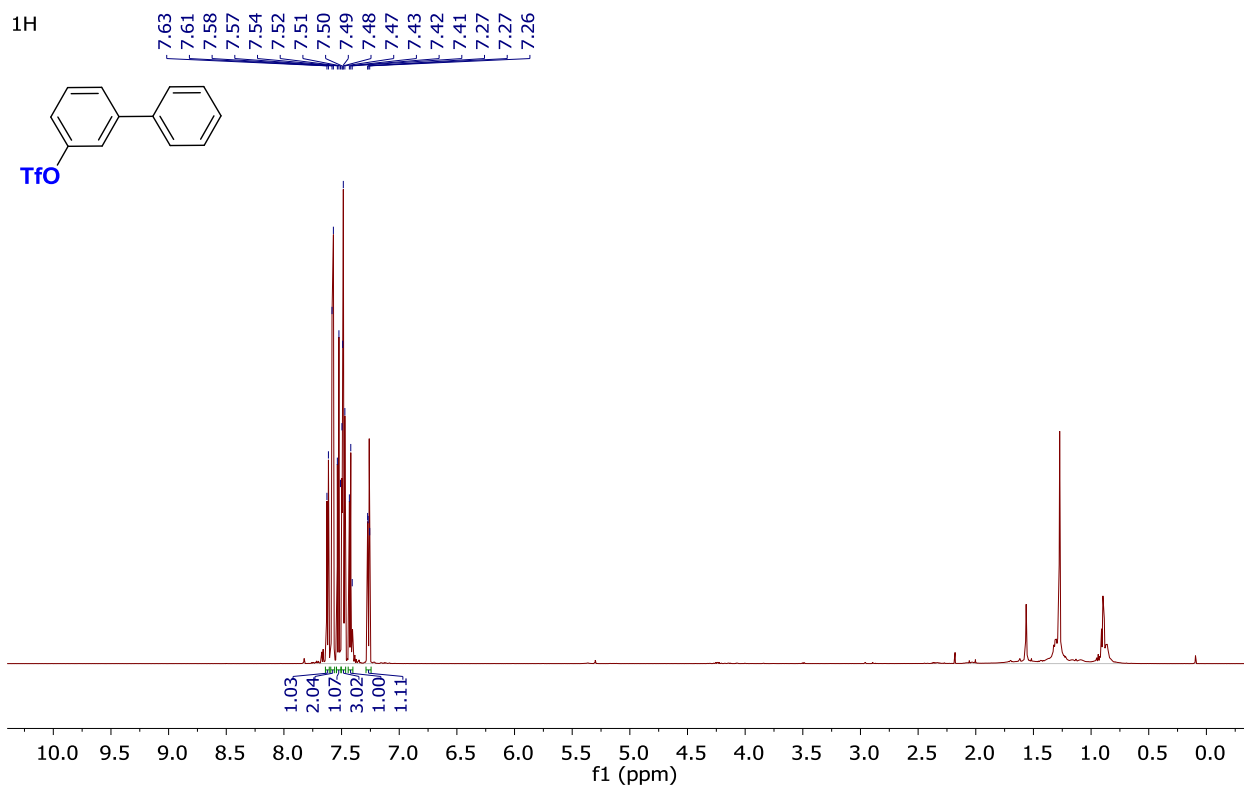

13C

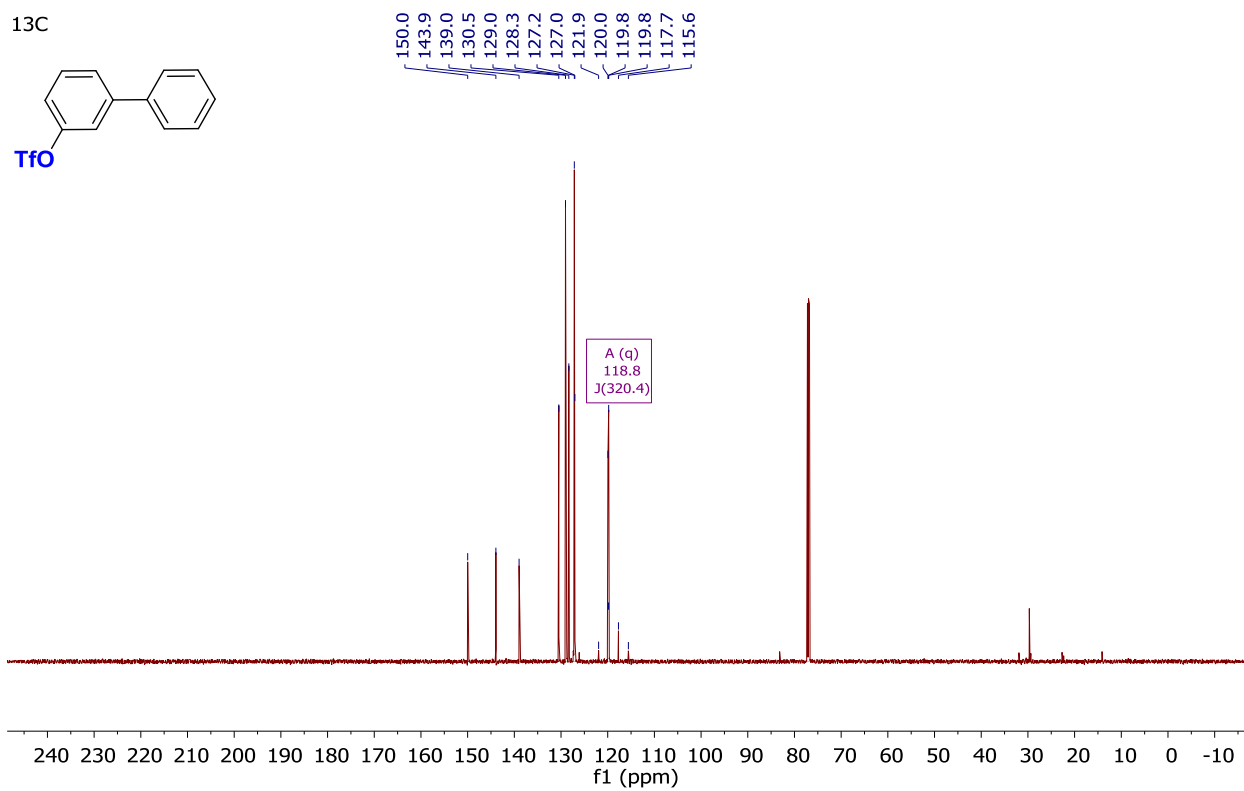

19F

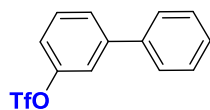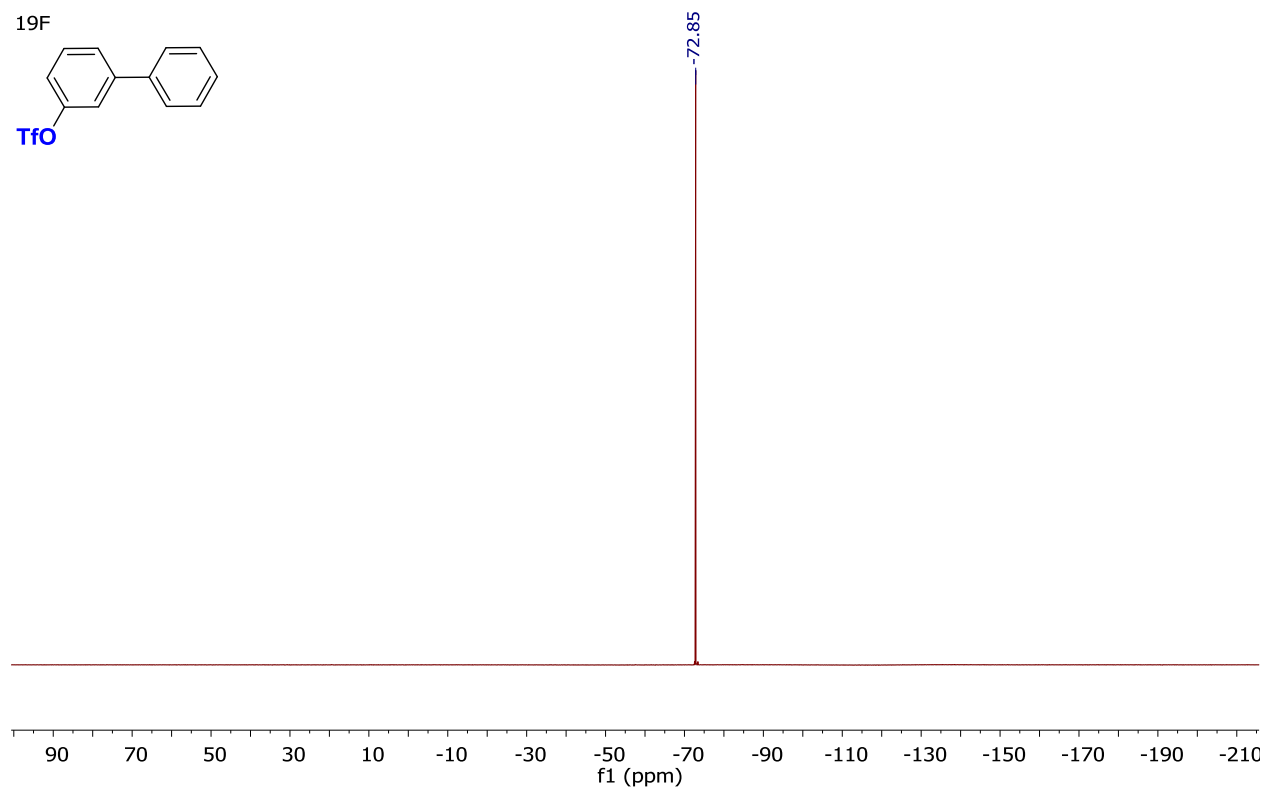

1H

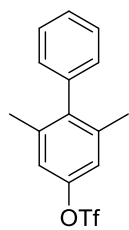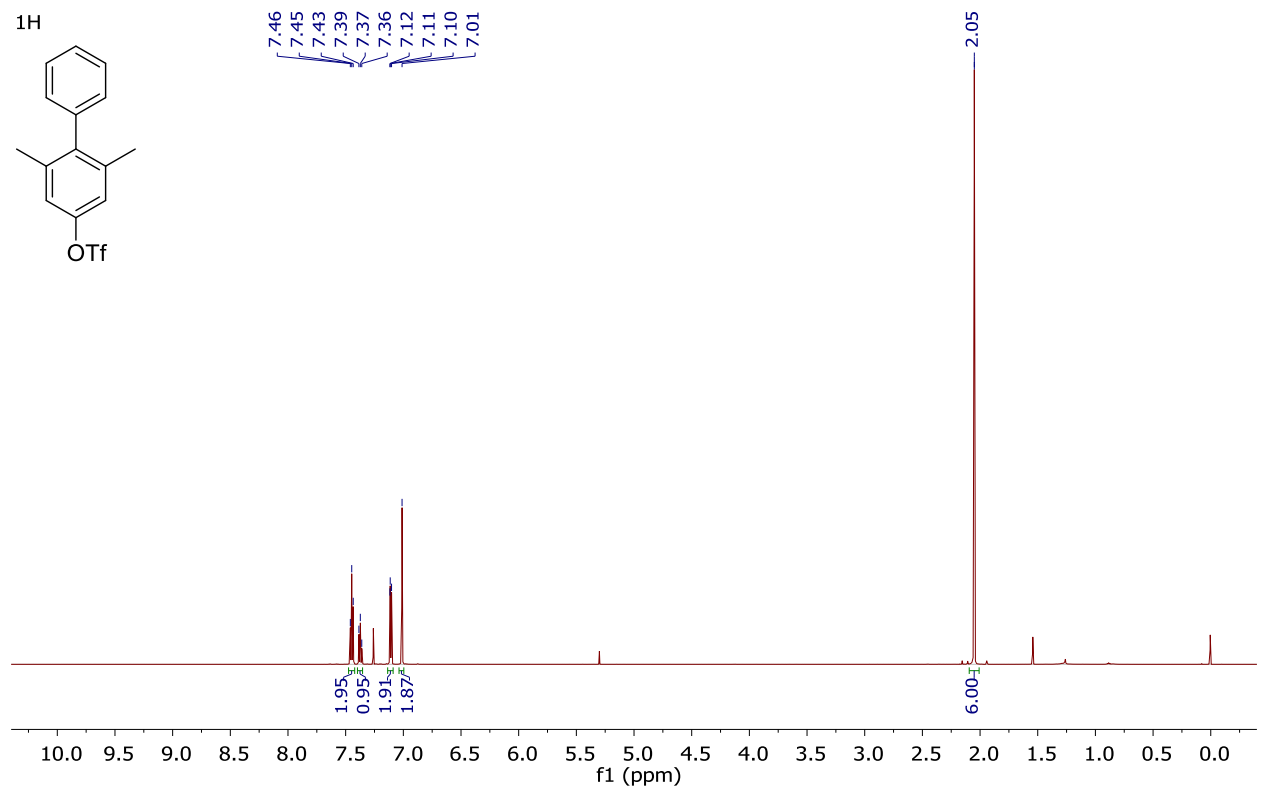

13C

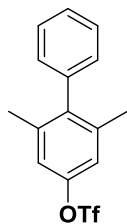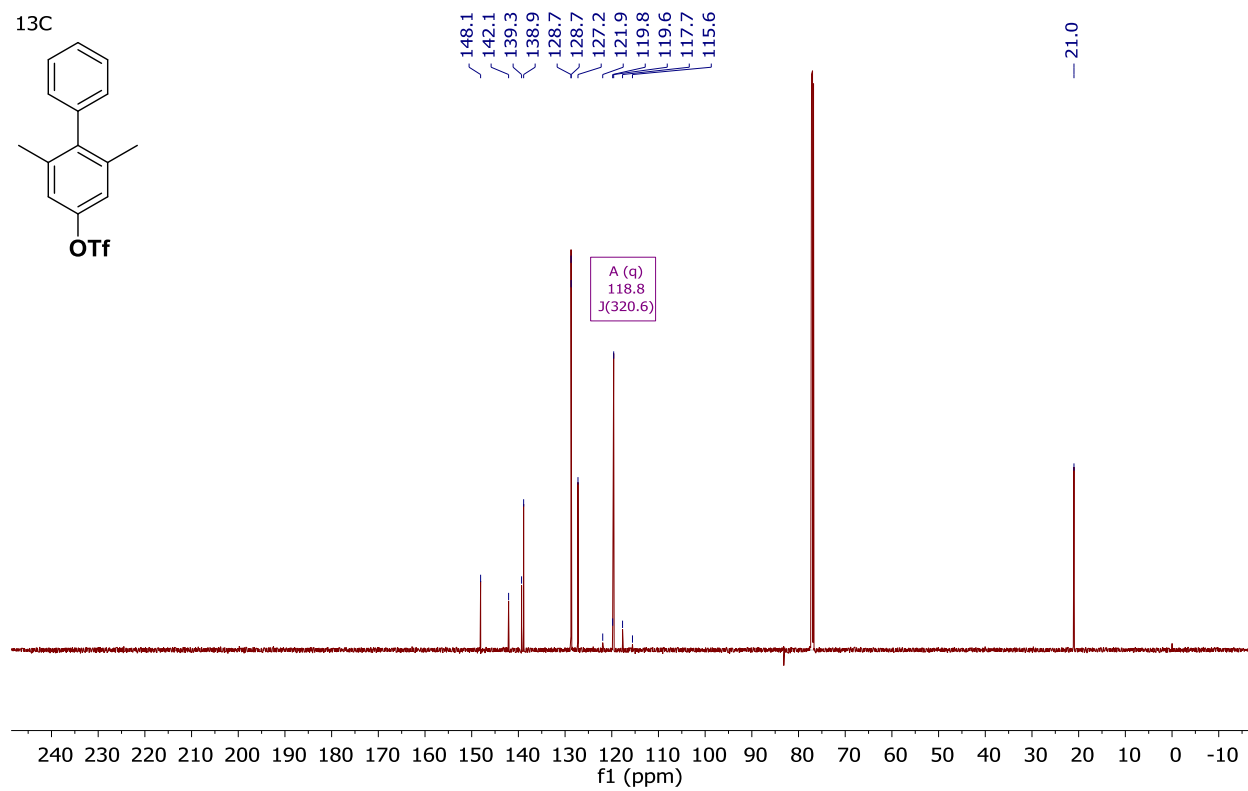

19F

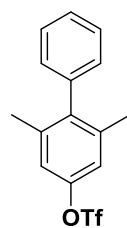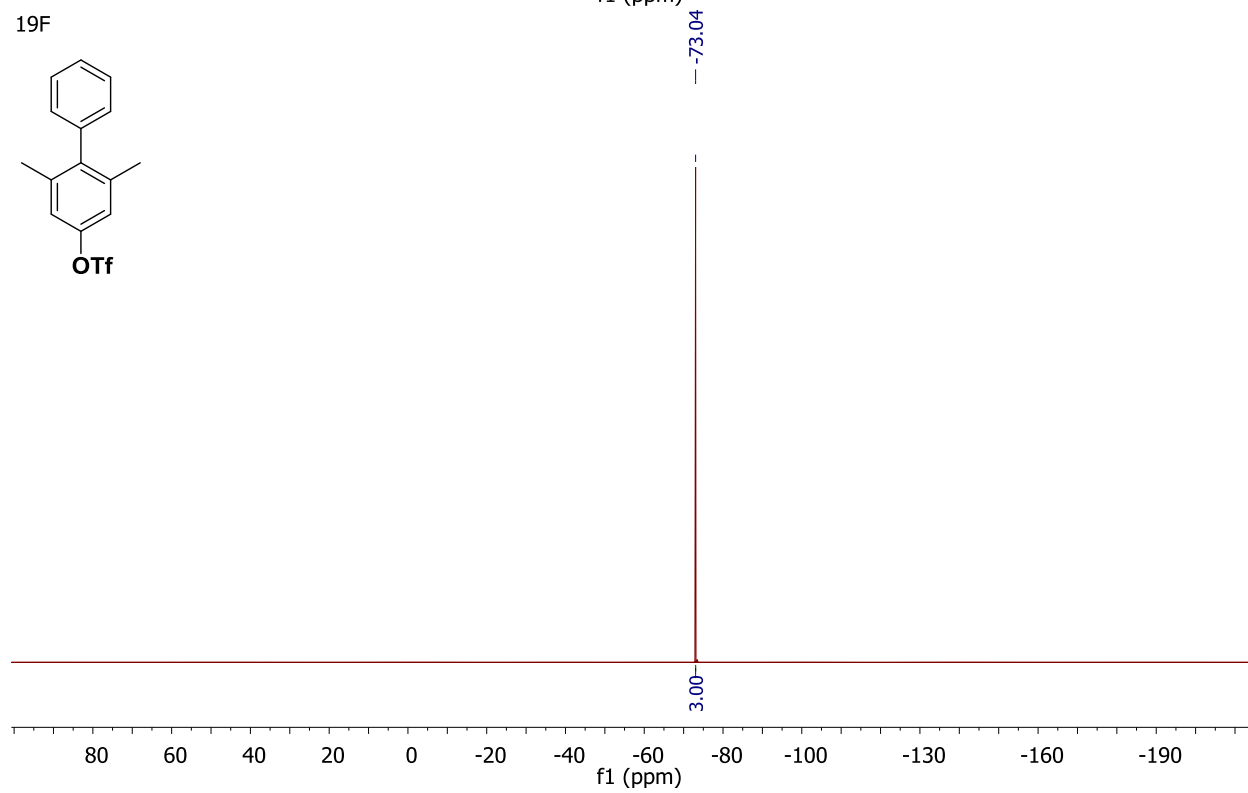

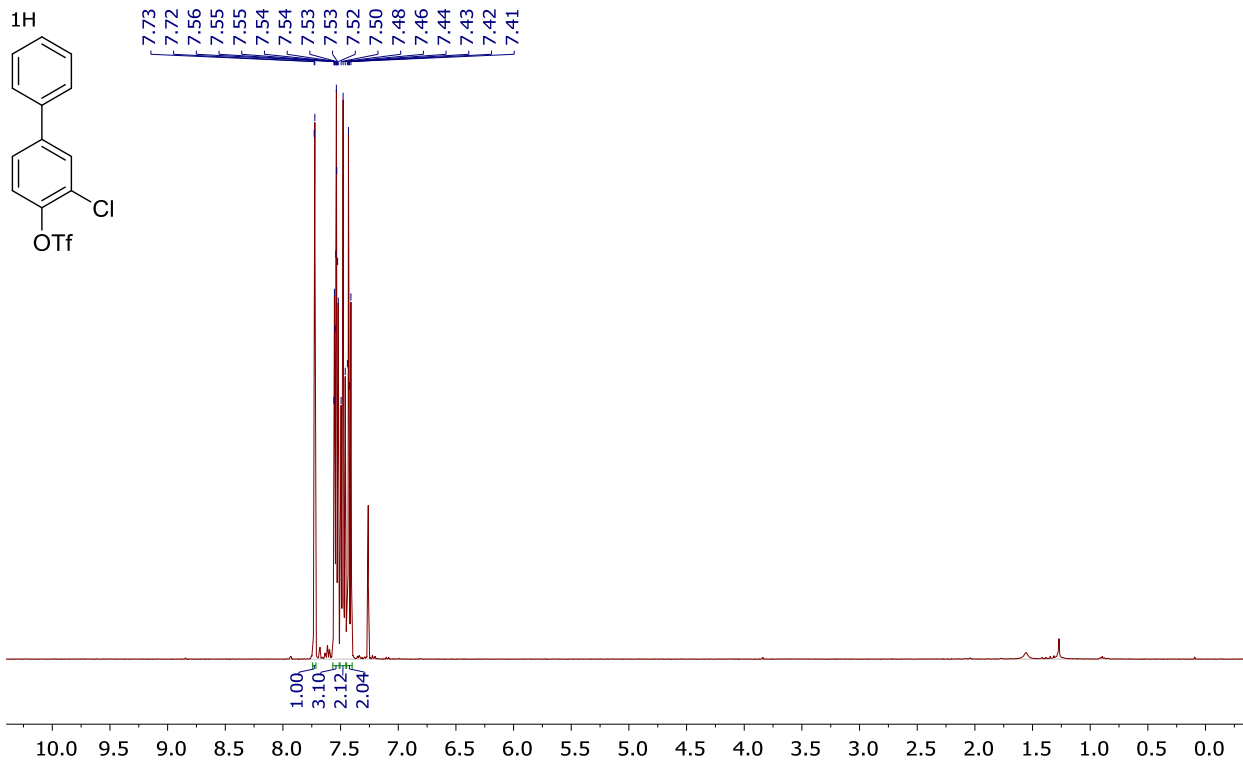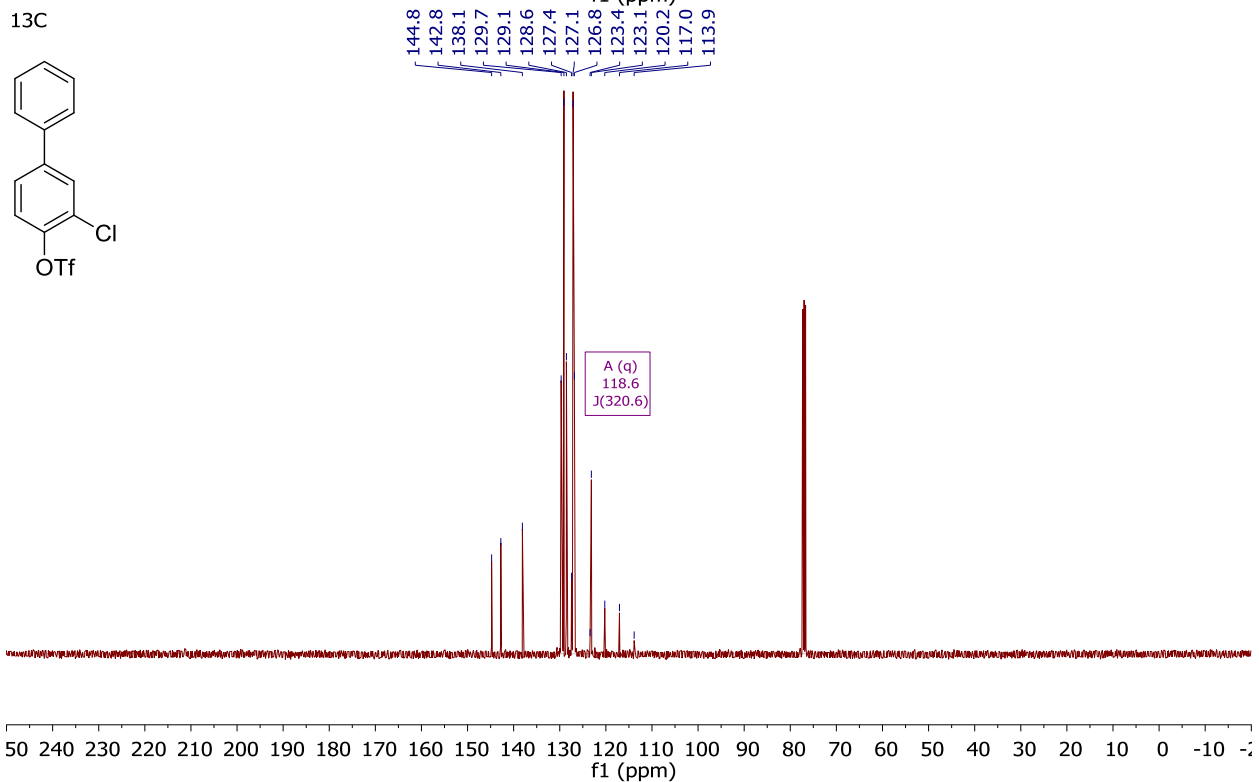

19F

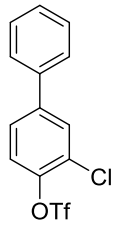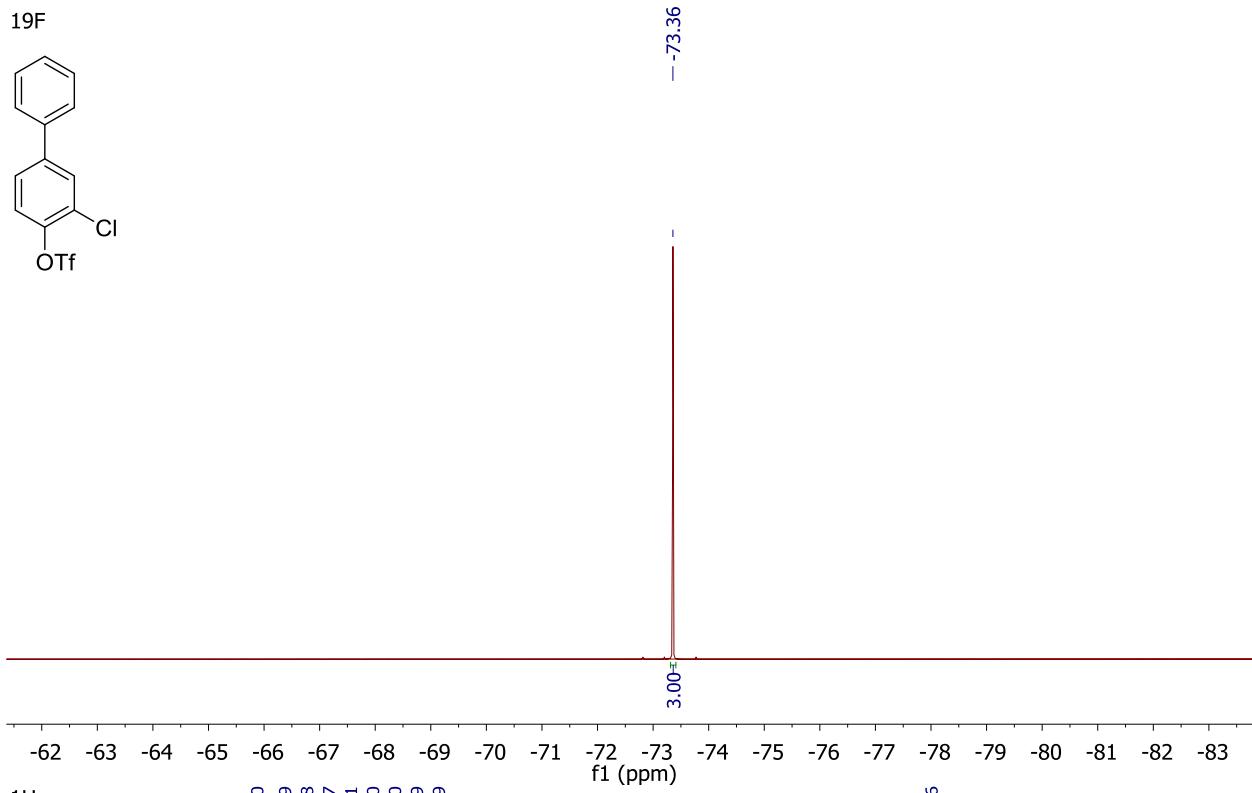

1H

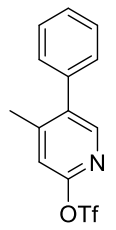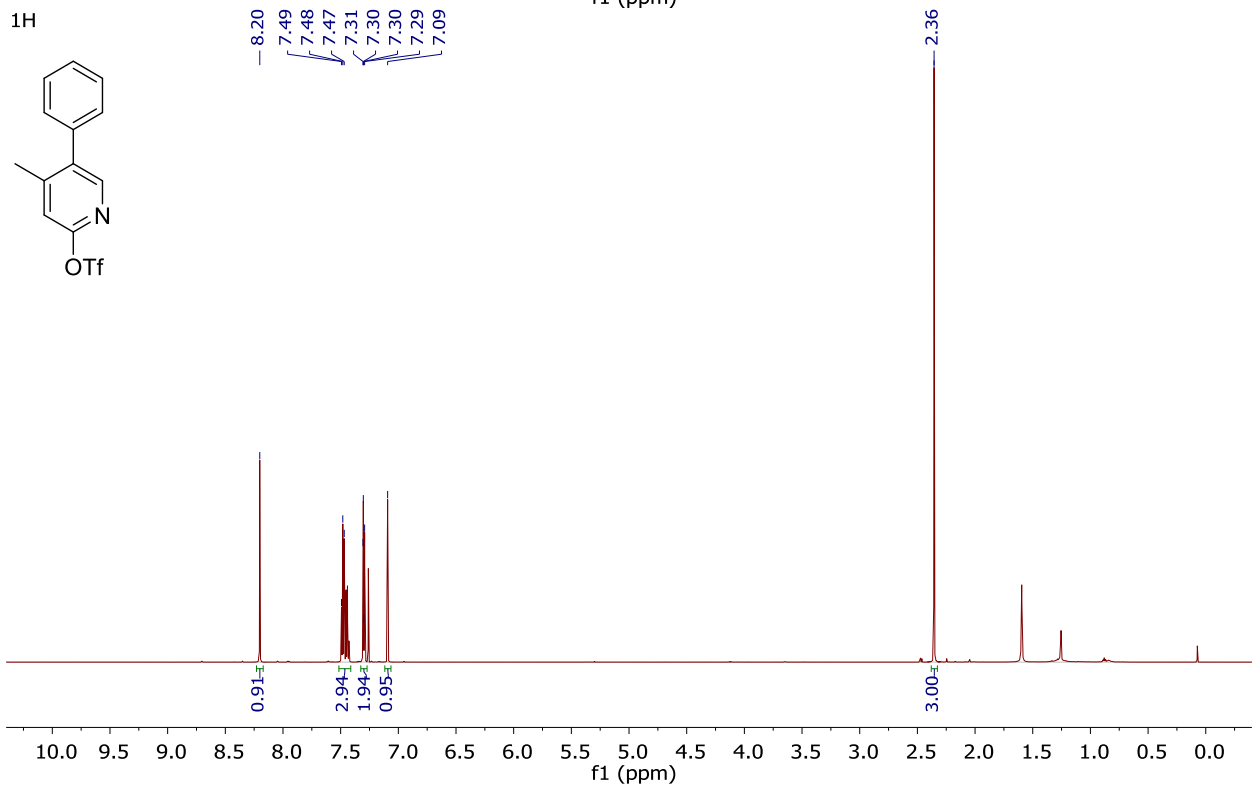

13C

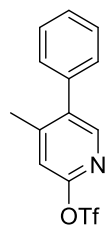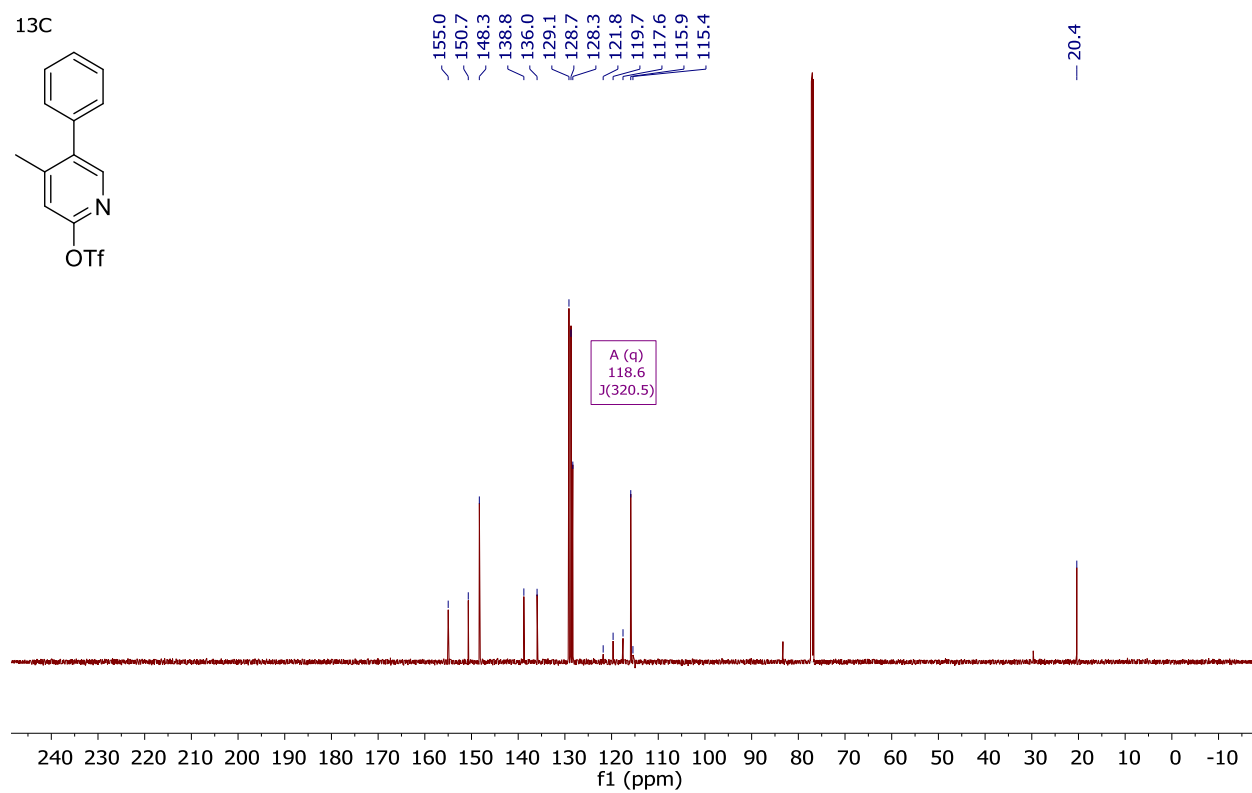

19F

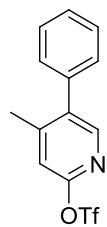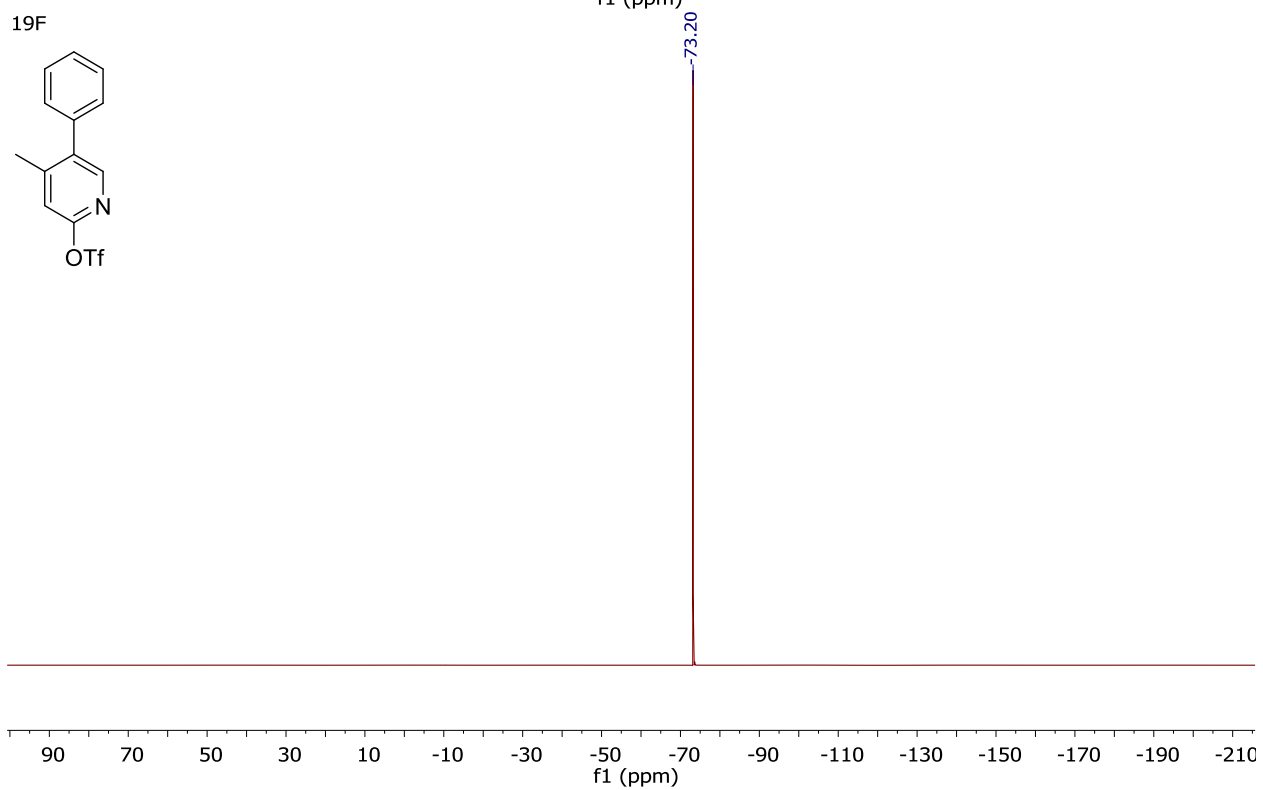

<sup>1</sup>H

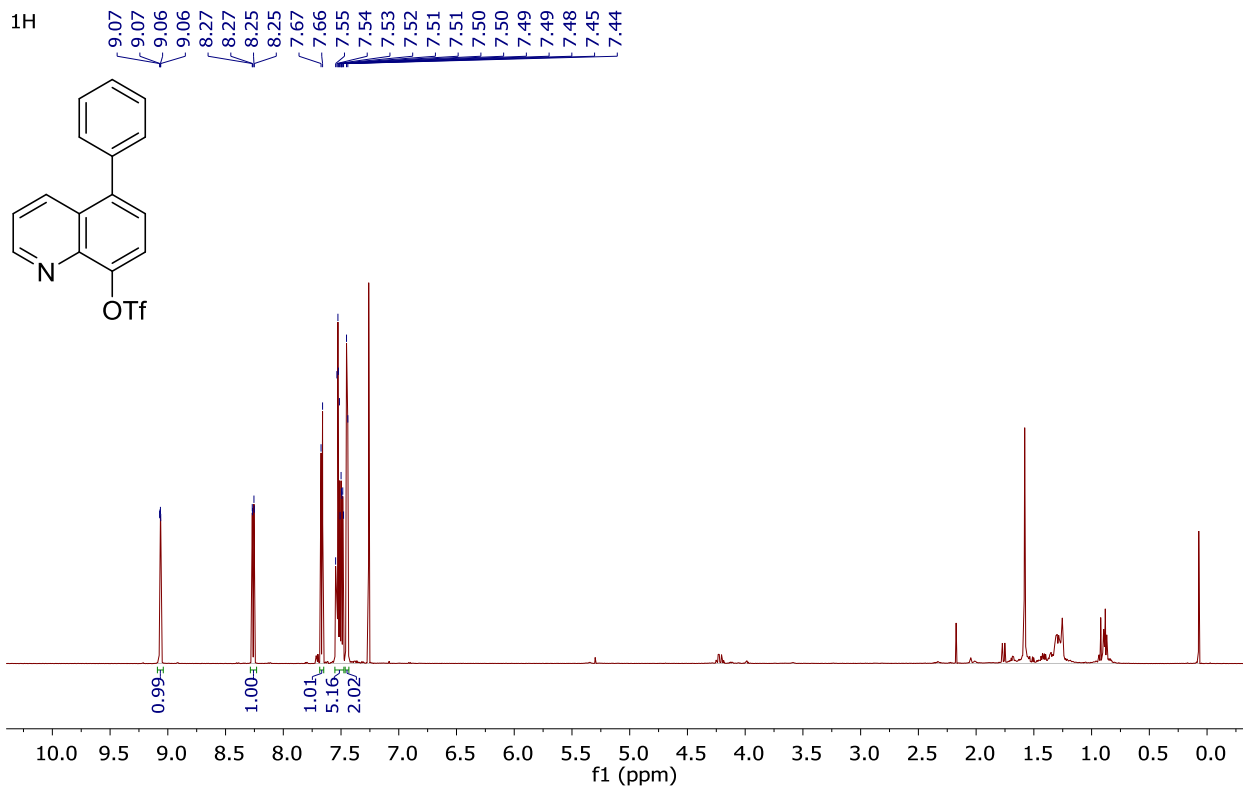

<sup>13</sup>C

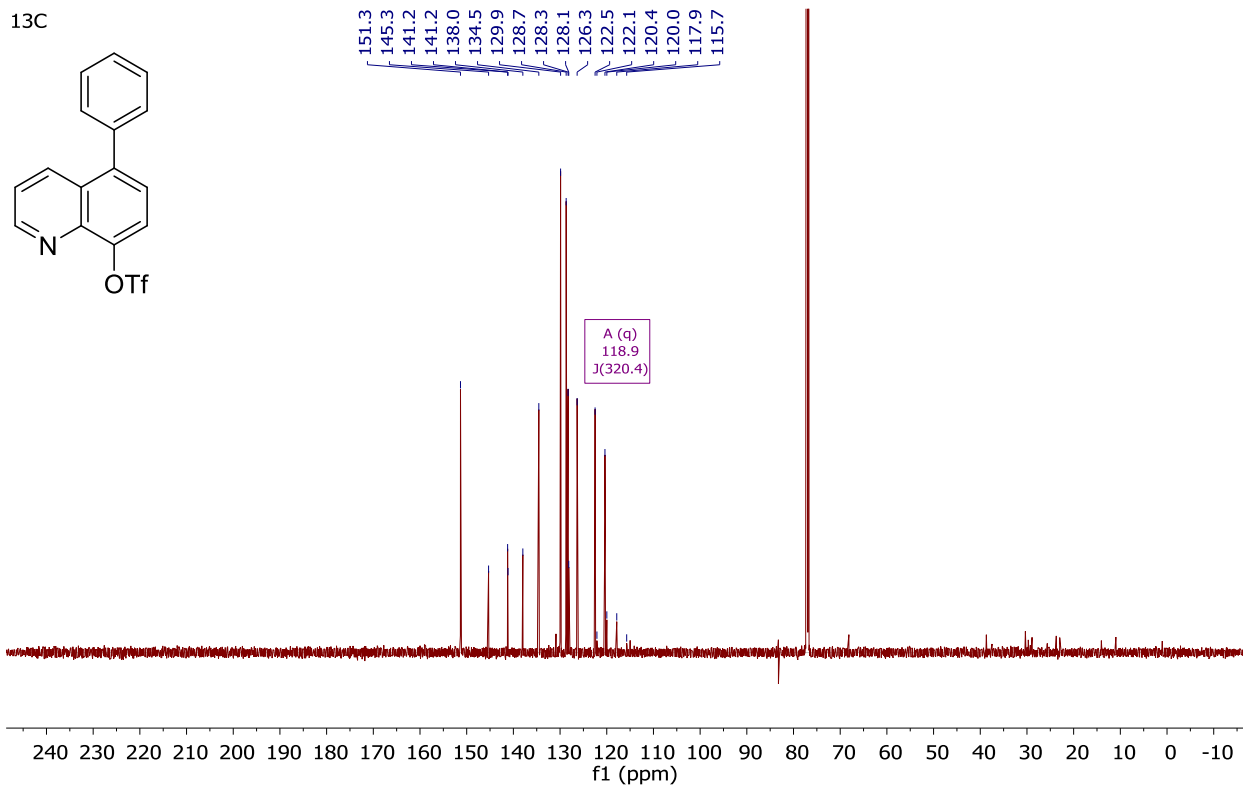



19F

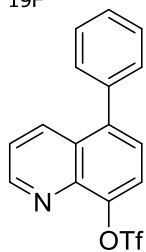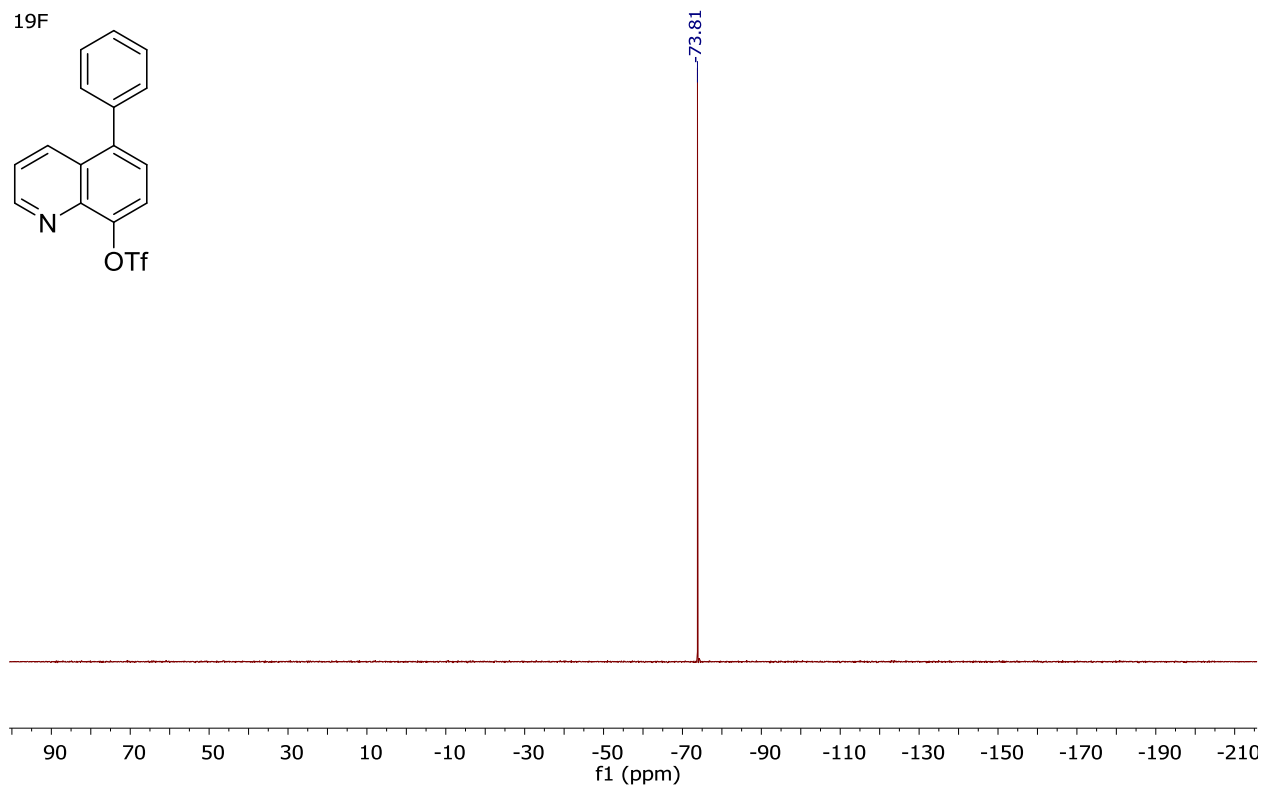

1H

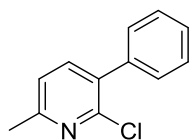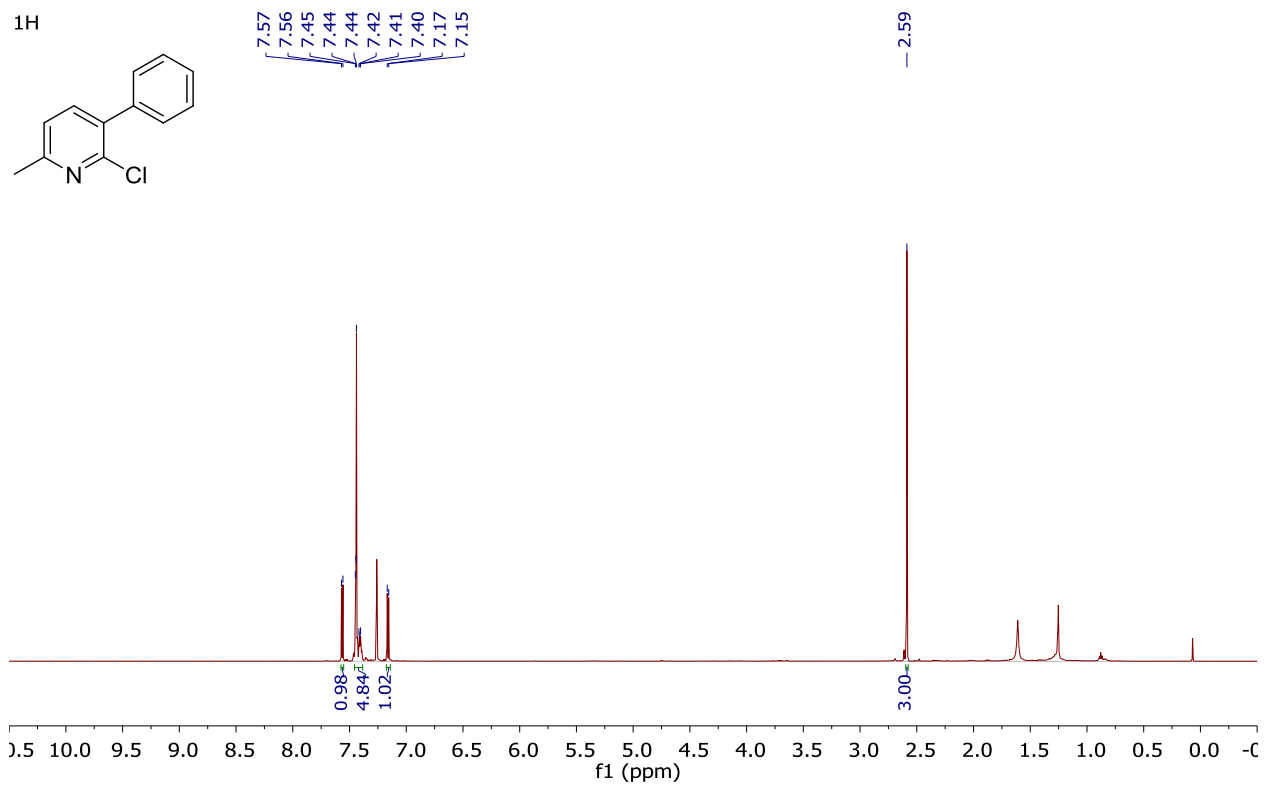

13C

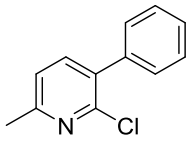

158.2  
148.7  
140.1  
137.7  
133.9  
129.5  
128.4  
128.2  
122.3

24.0

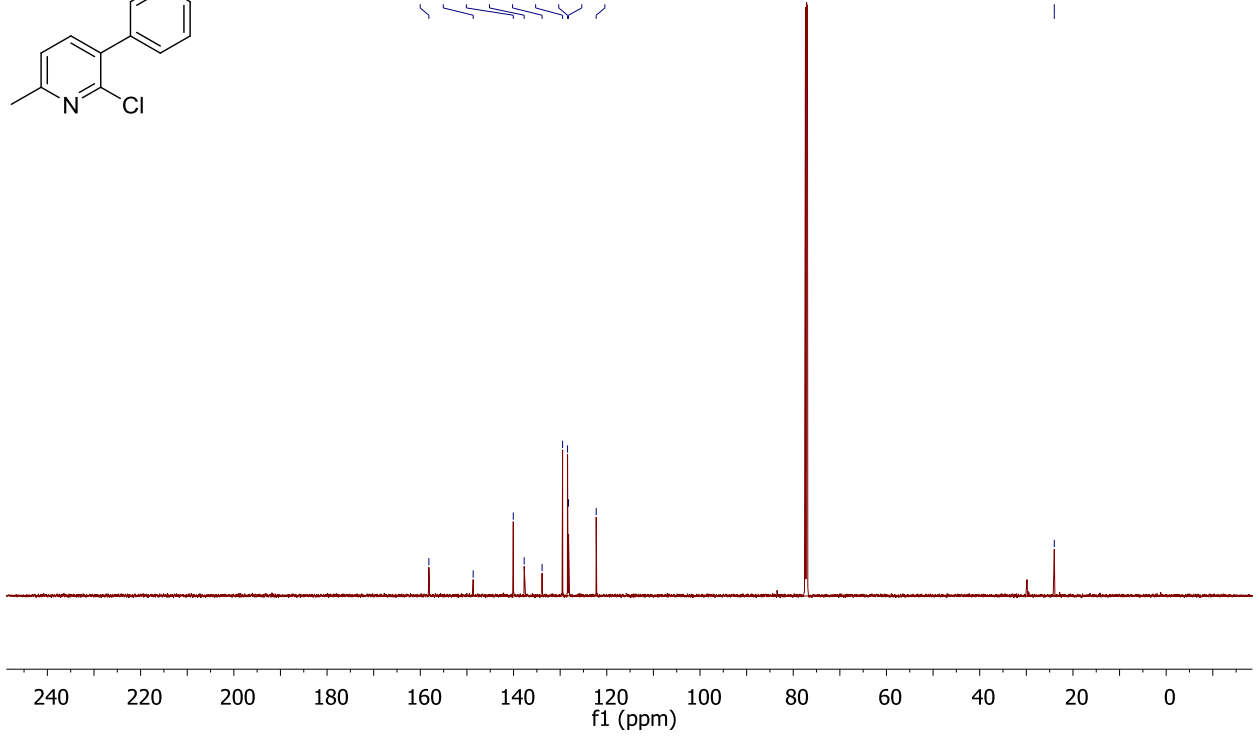

1H  
8.51  
8.29  
8.27  
8.03  
8.02  
8.01  
8.00  
7.93  
7.91  
7.75  
7.74  
7.74  
7.74  
7.73  
7.72  
7.63  
7.62  
7.55  
7.53  
7.51  
7.46  
7.44  
7.42

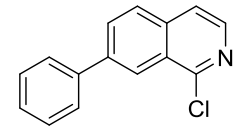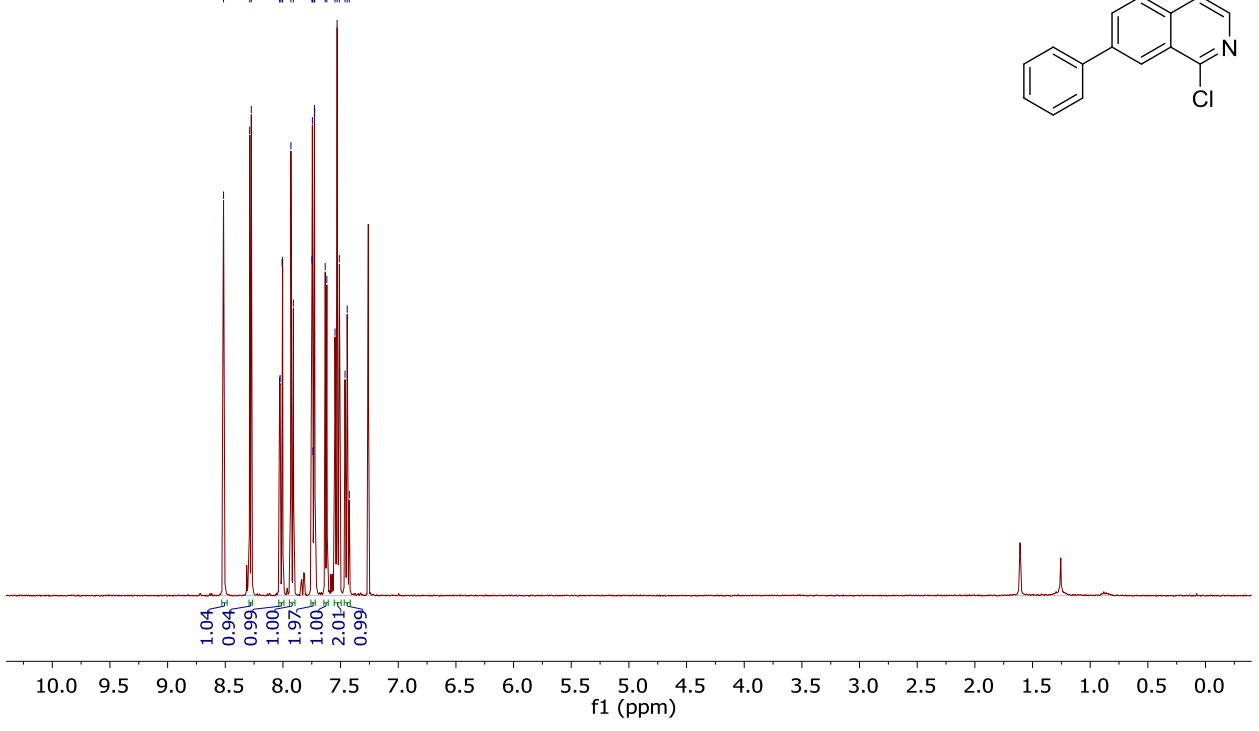

13C

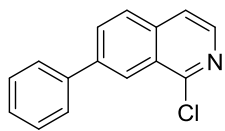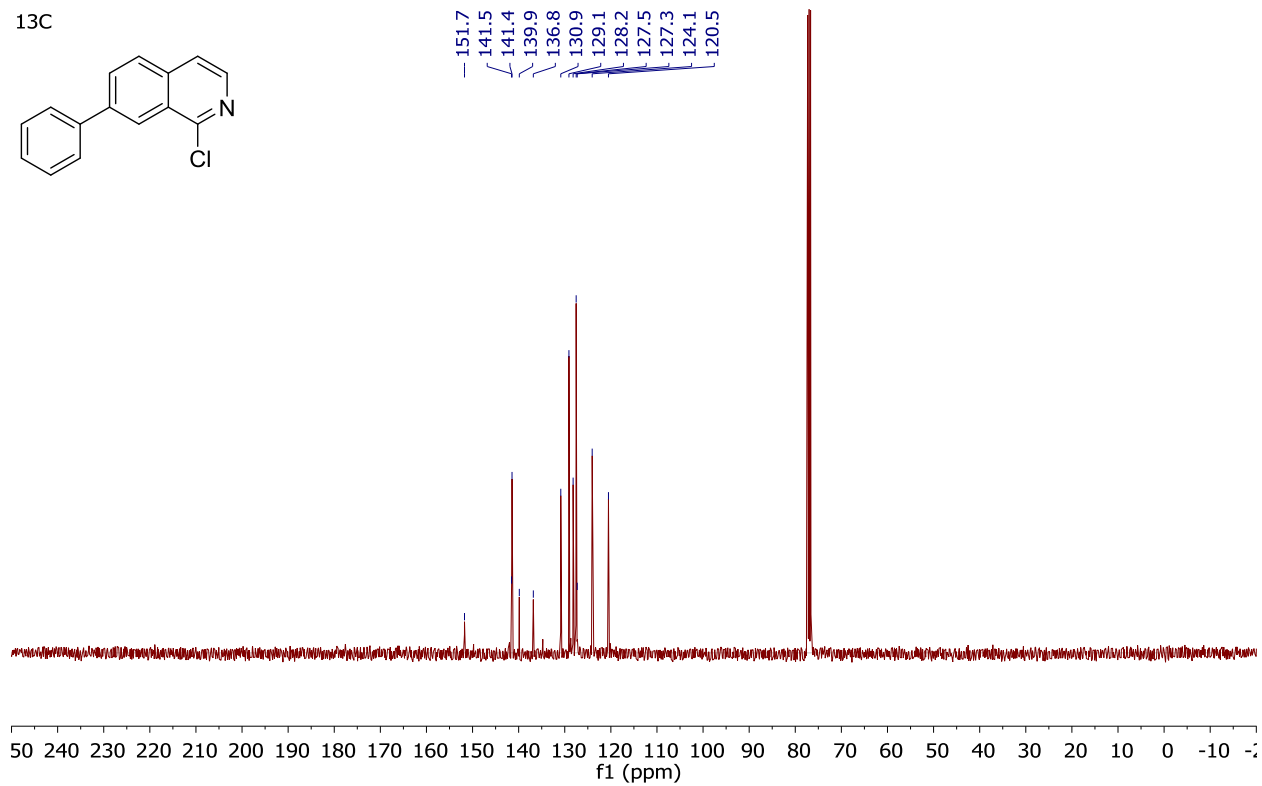

<sup>1</sup>H

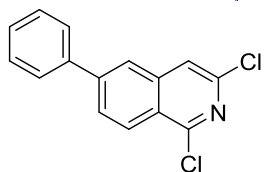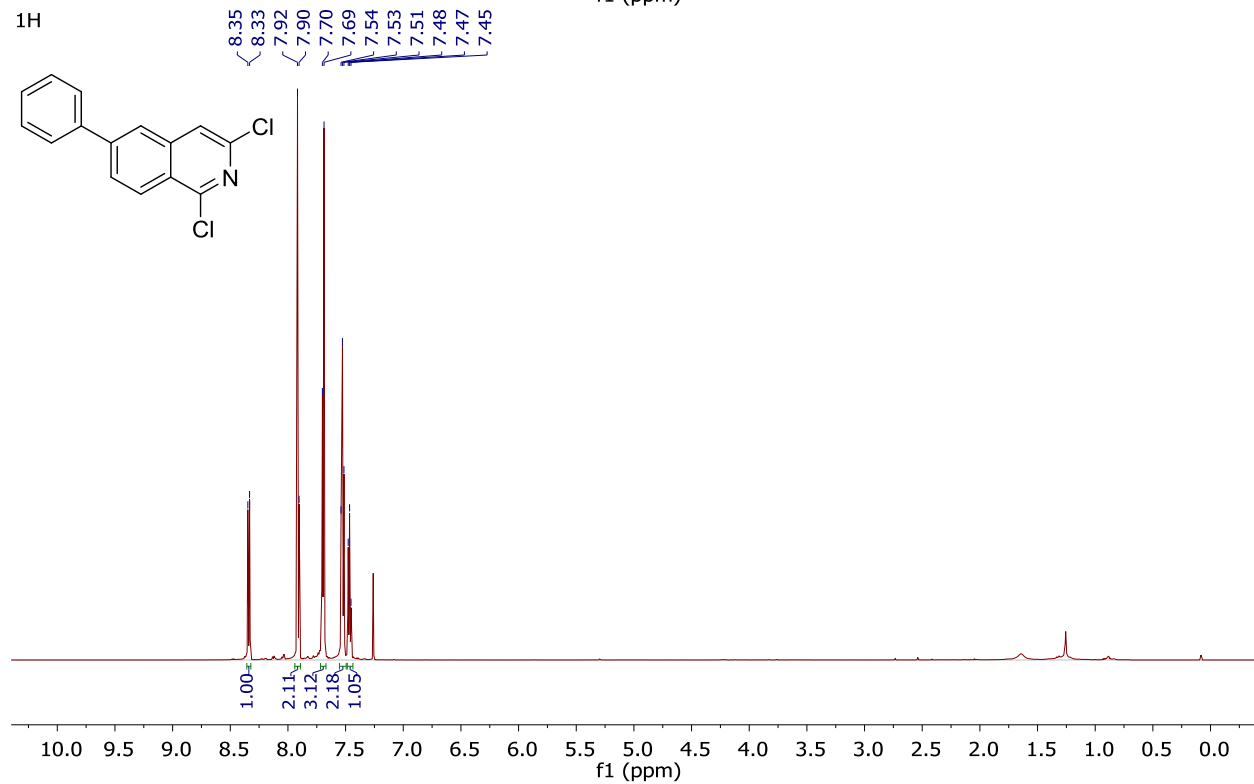

13C

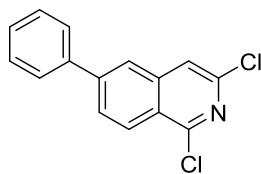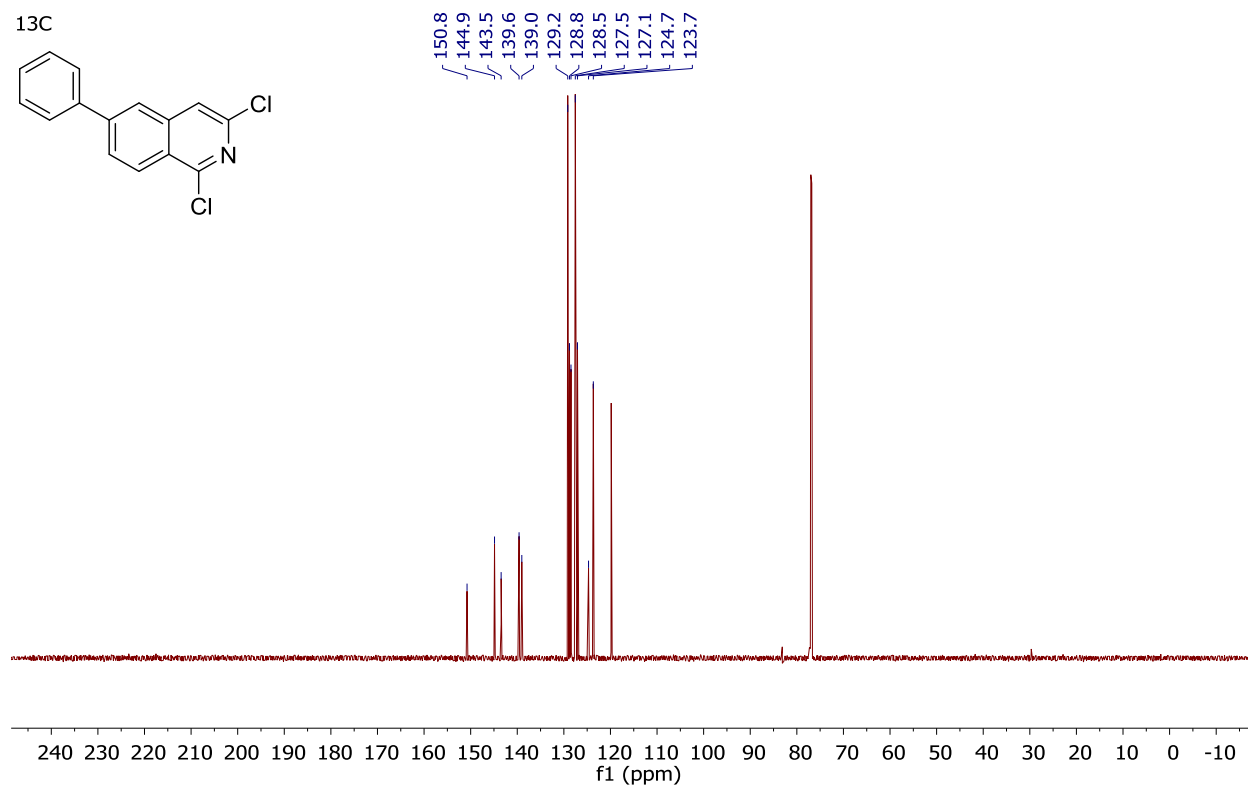

1H

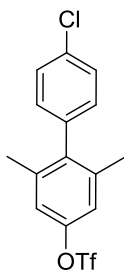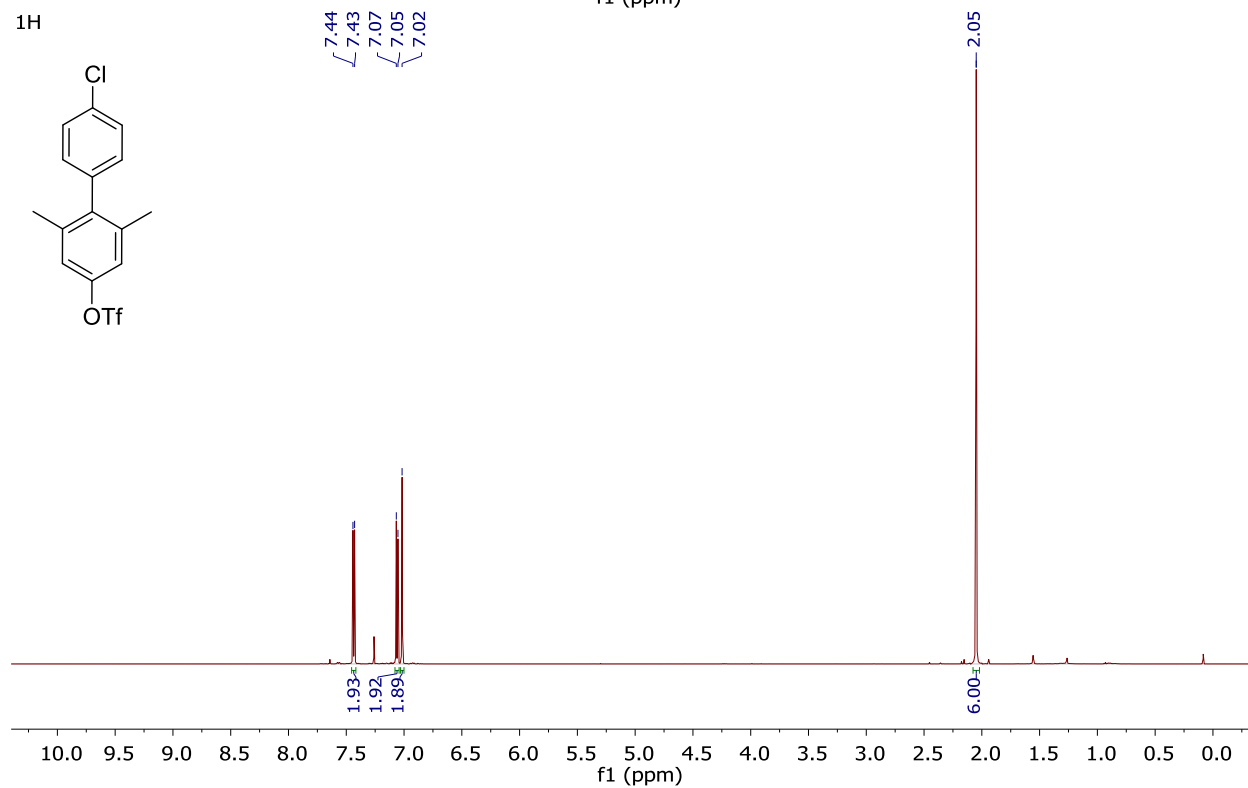

13C

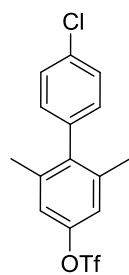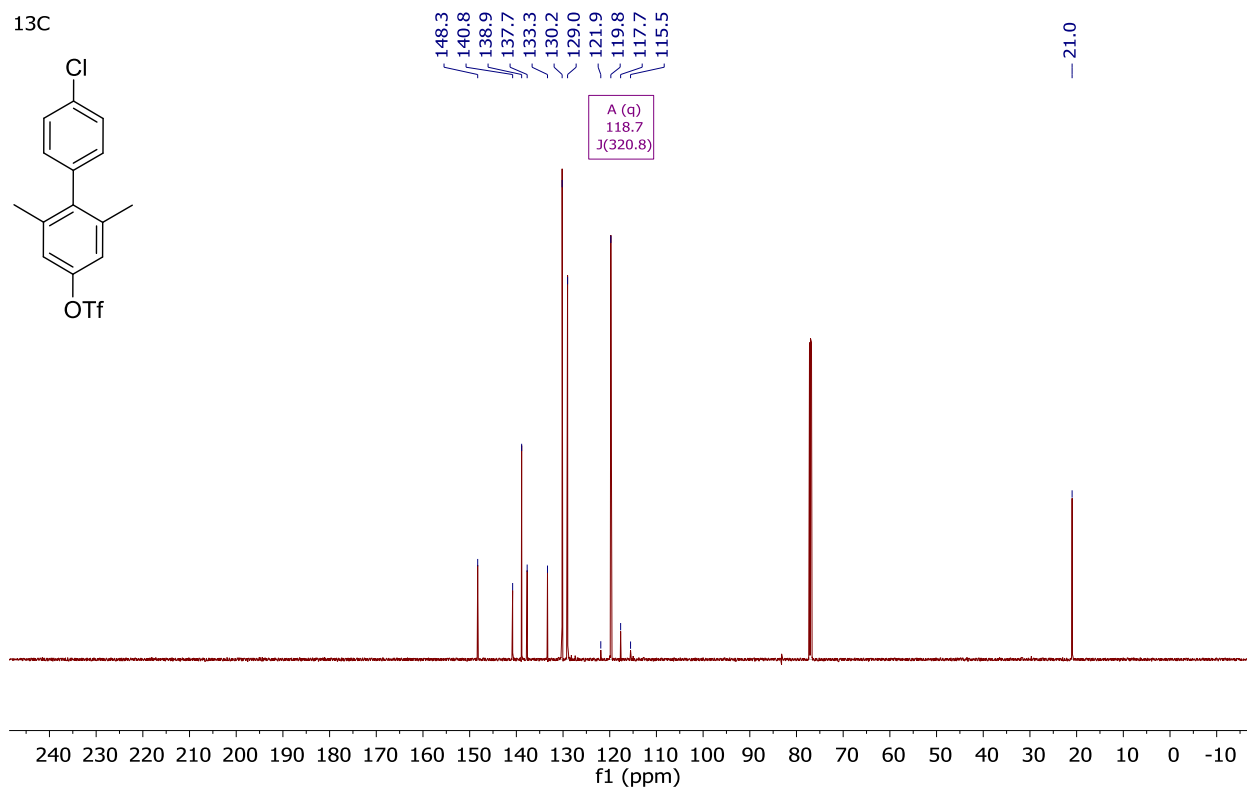

19F

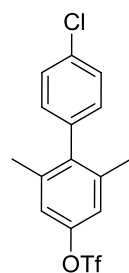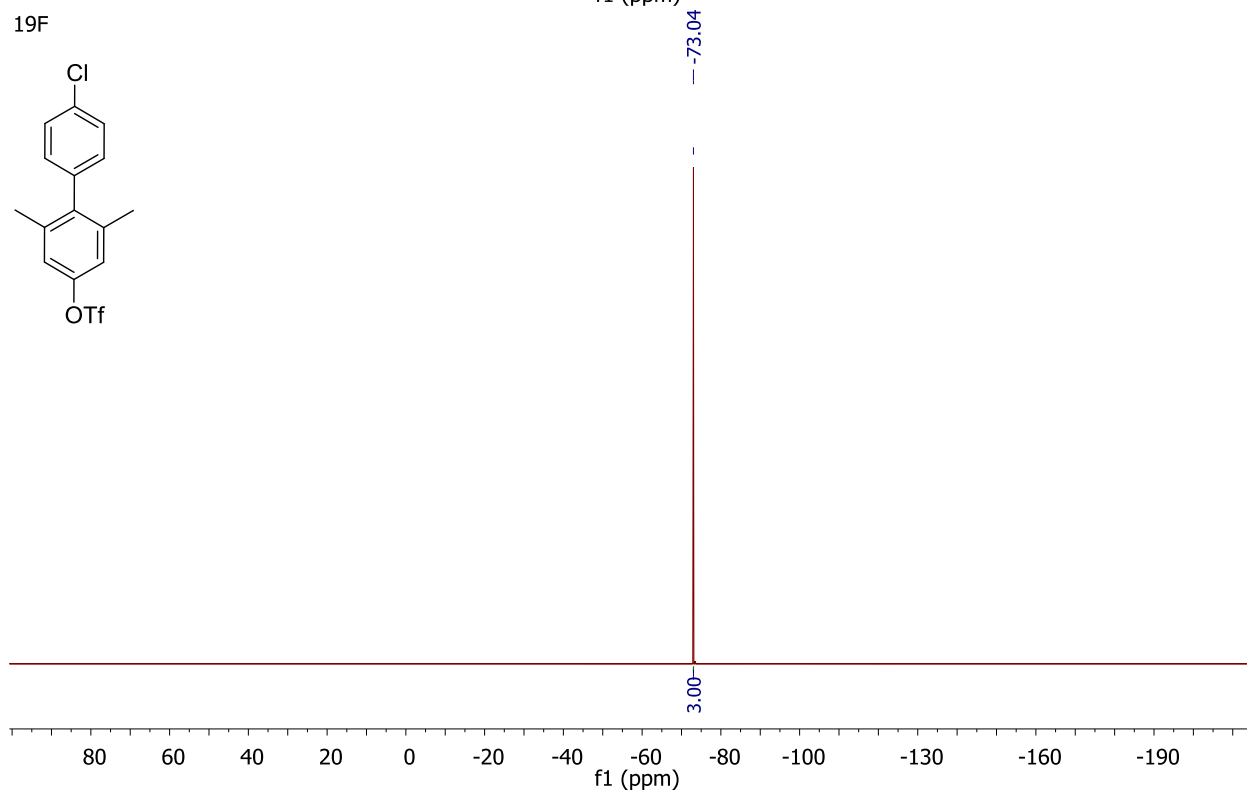

<sup>1</sup>H

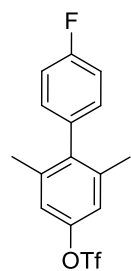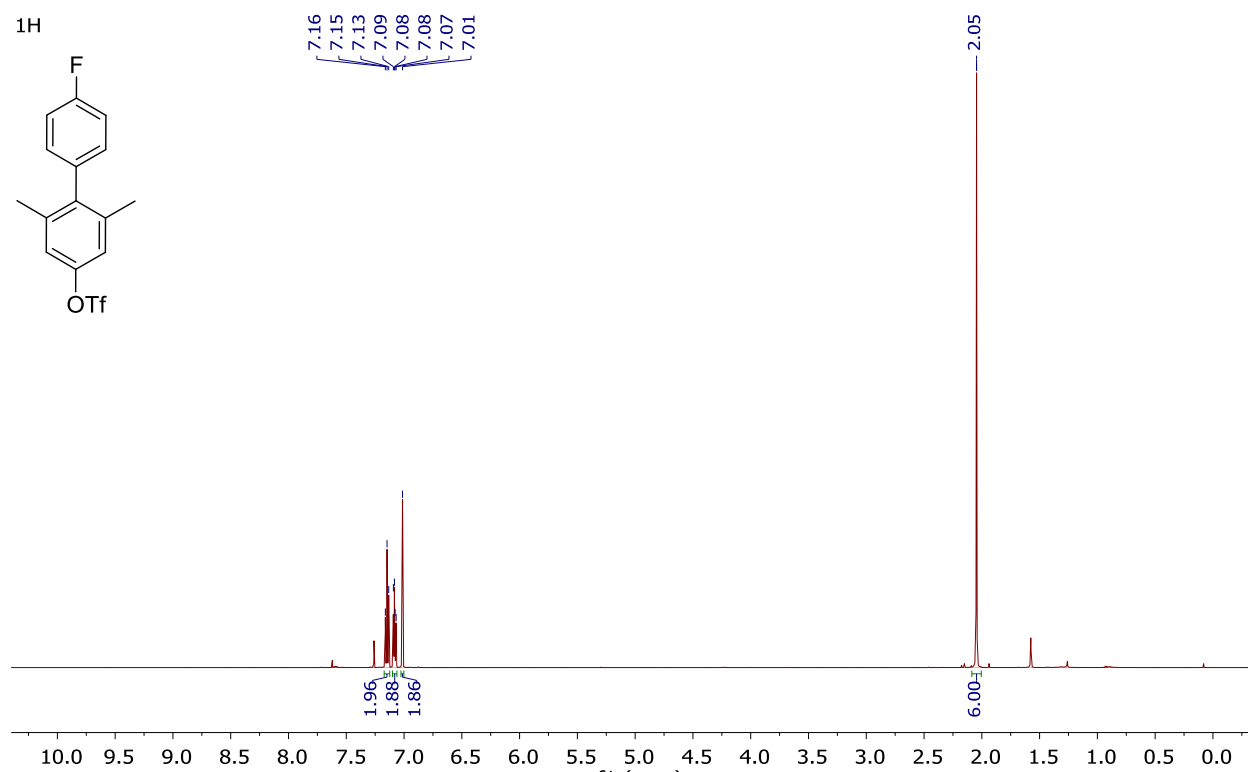

<sup>13</sup>C

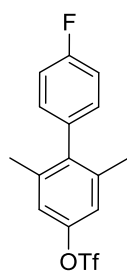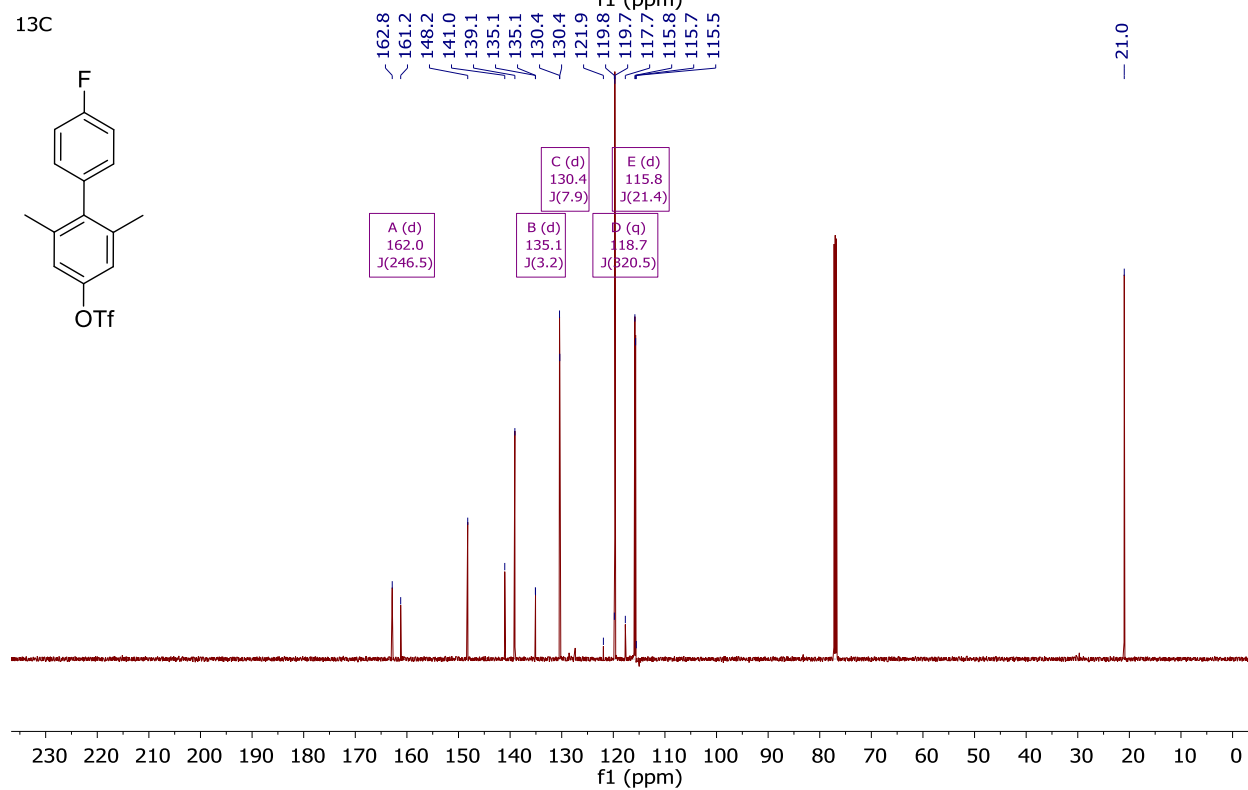

19F

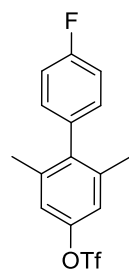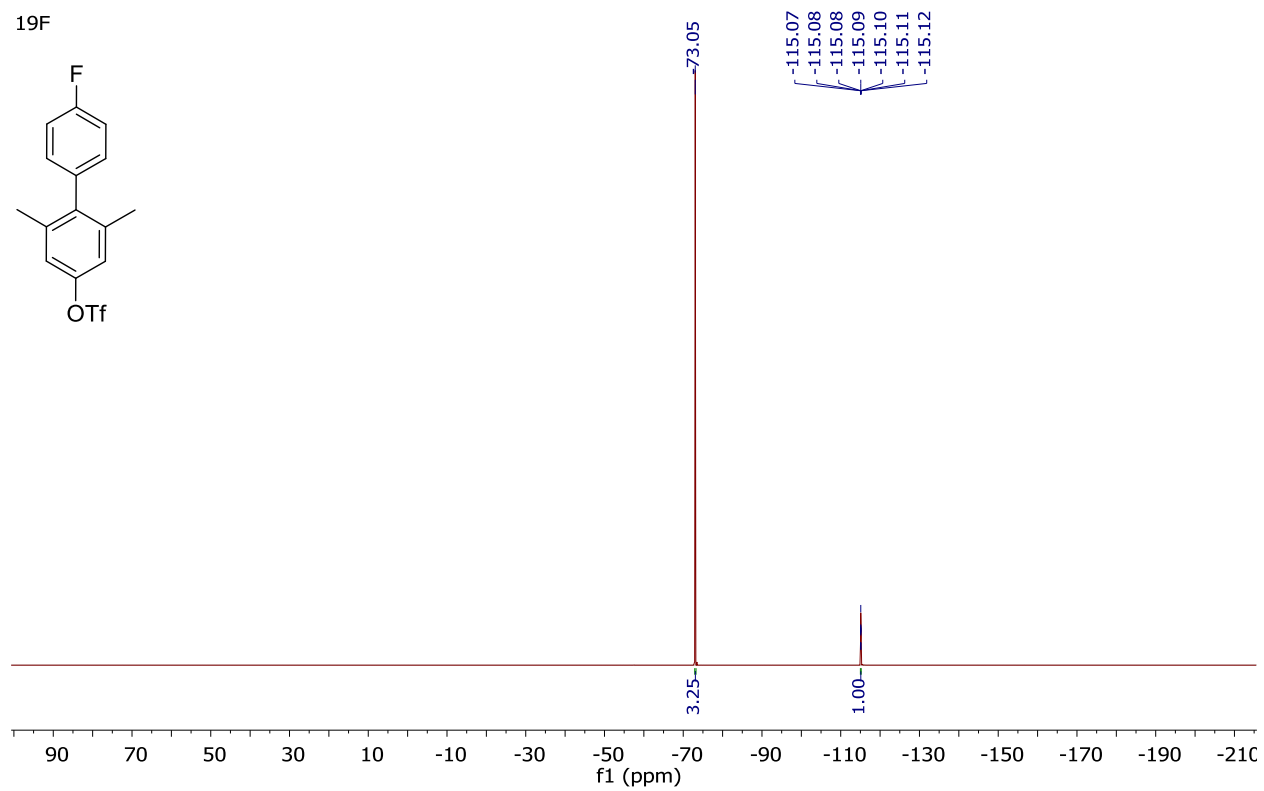

1H

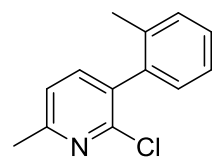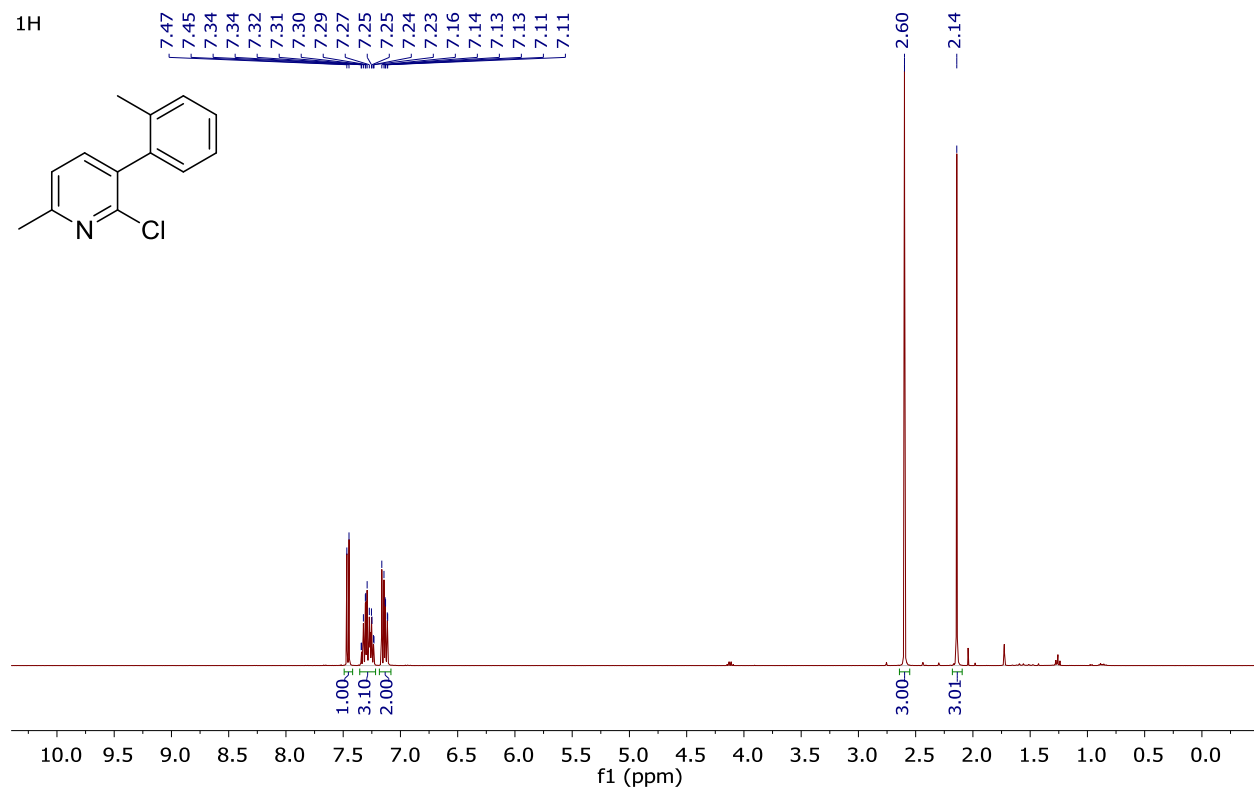

13C

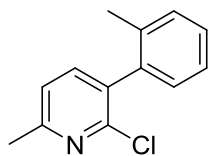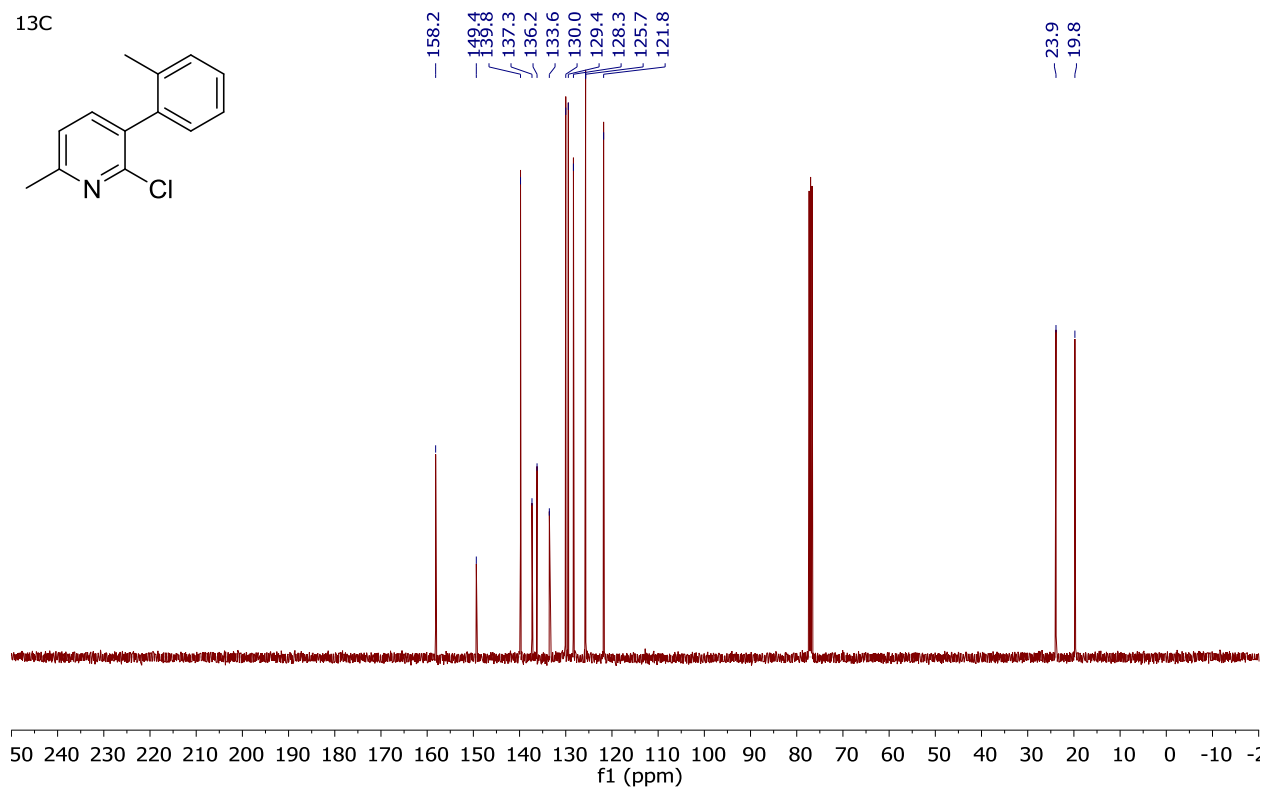

1H

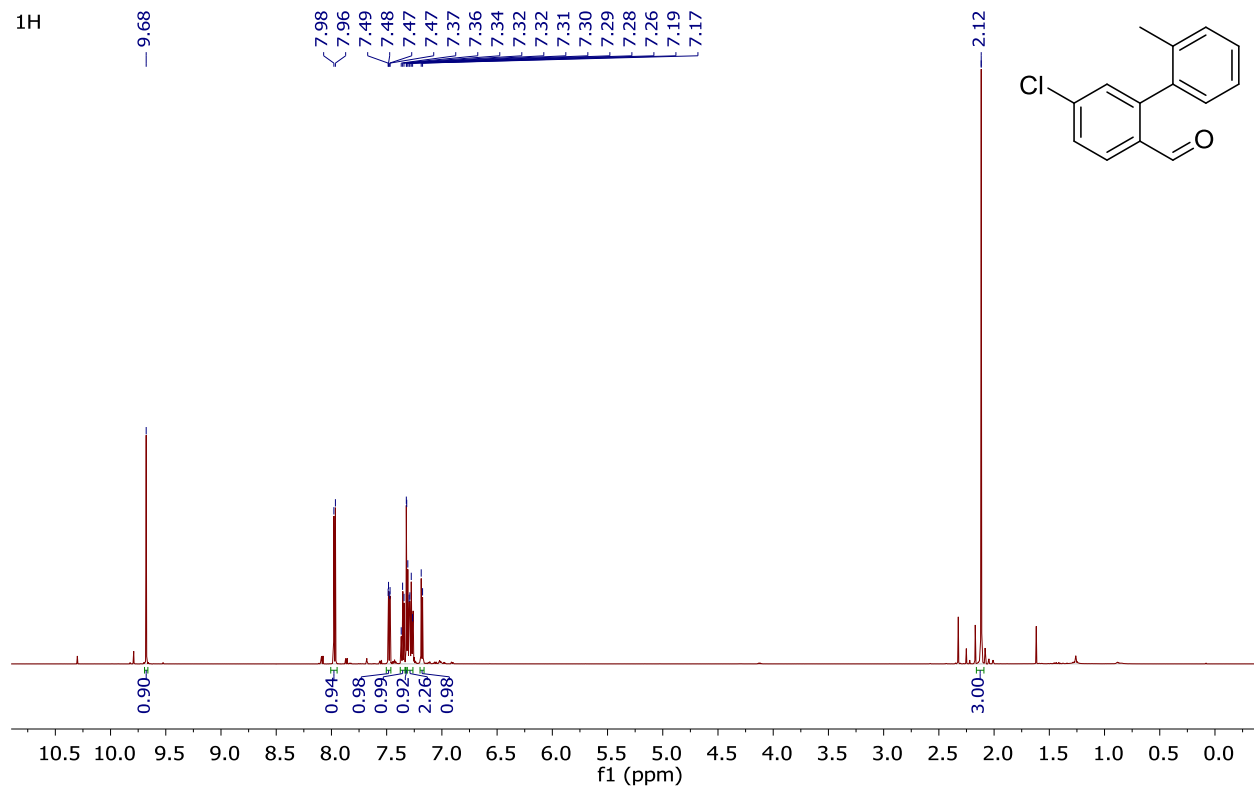



13C

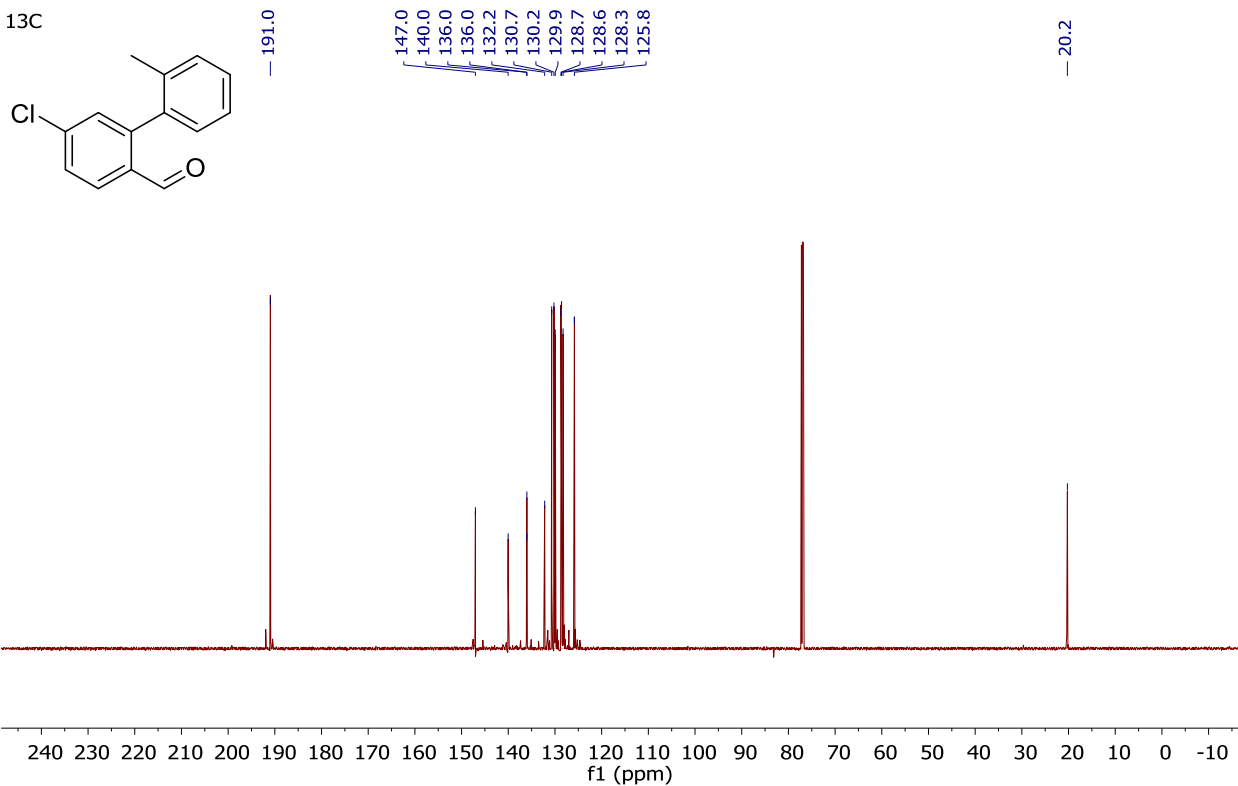

1H

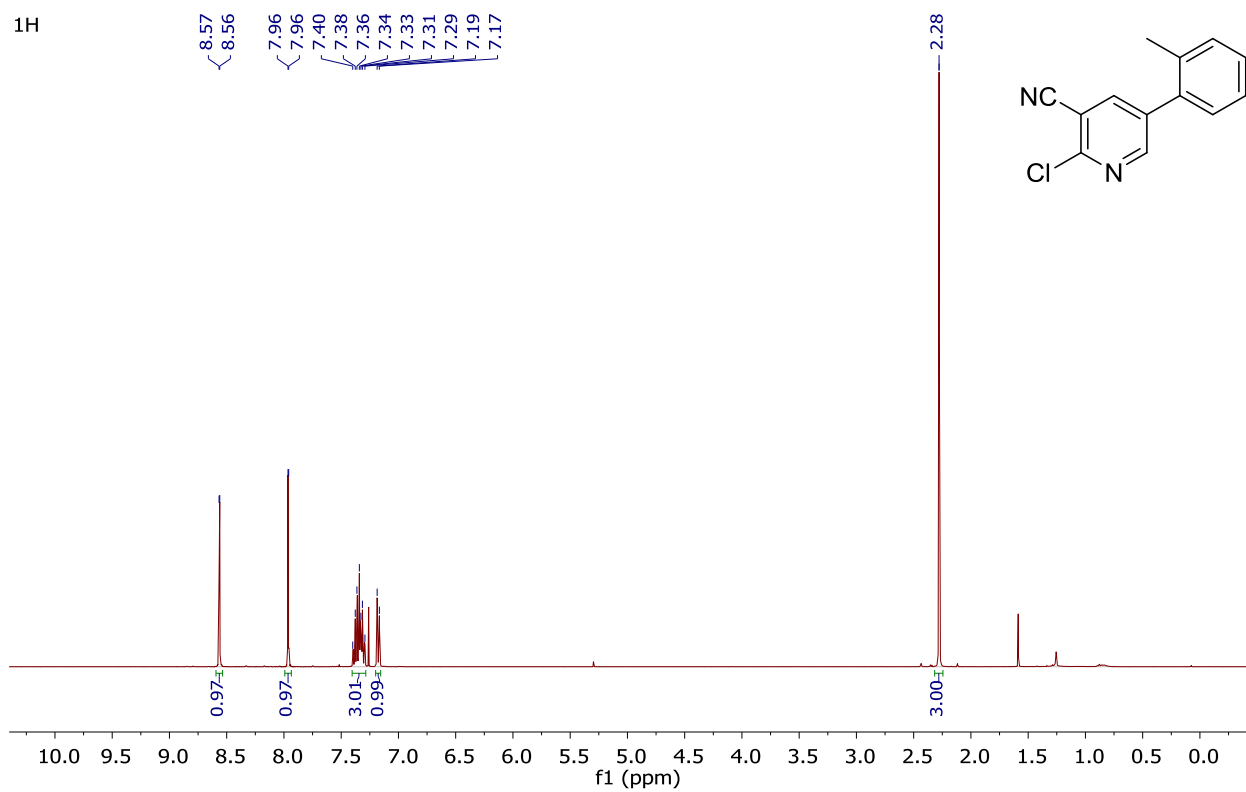

<sup>13</sup>C

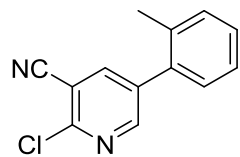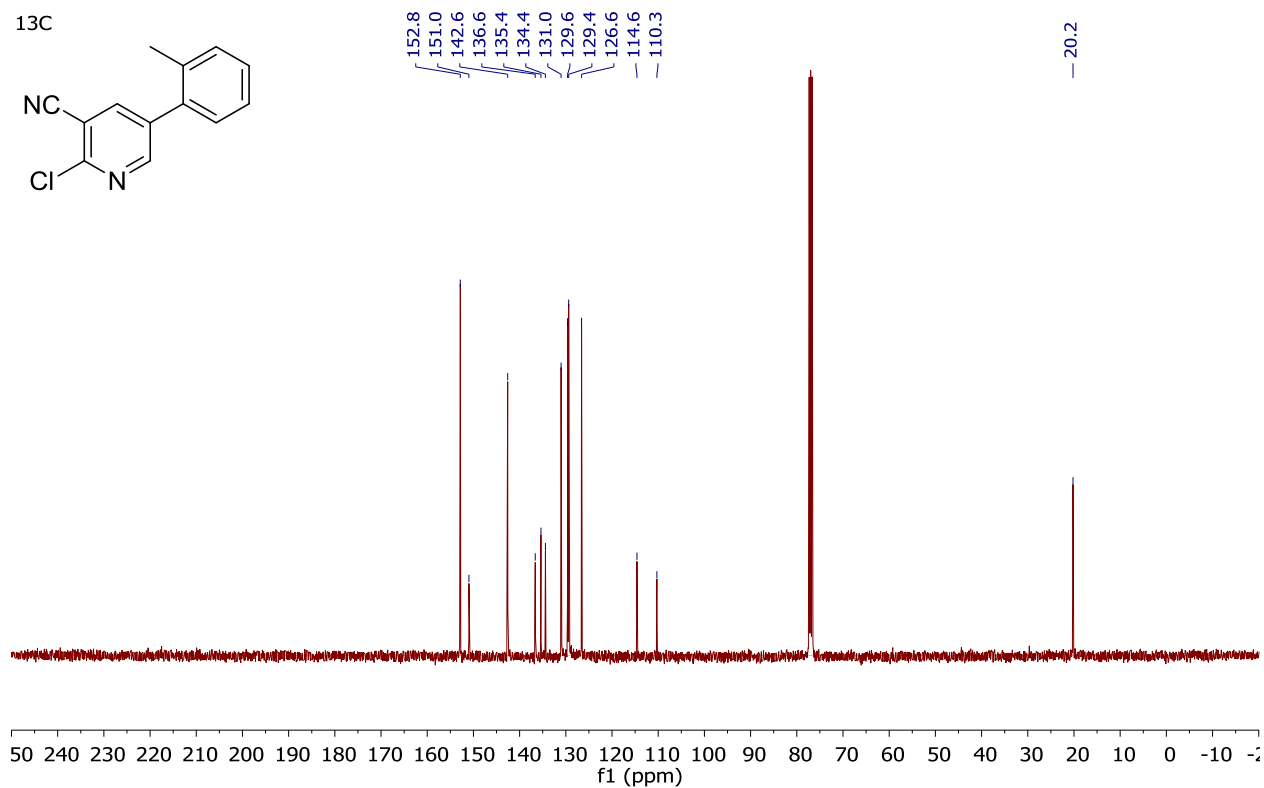

<sup>1</sup>H

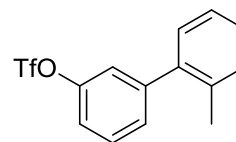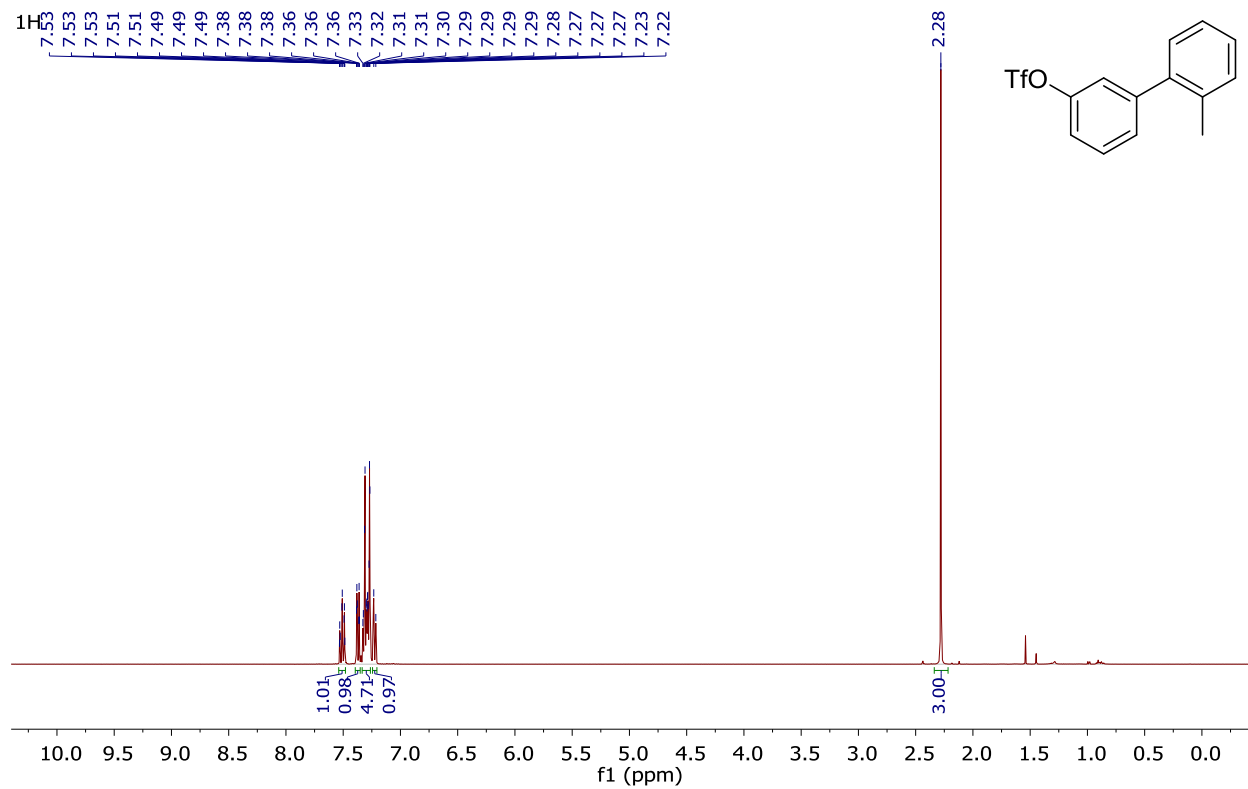

13C

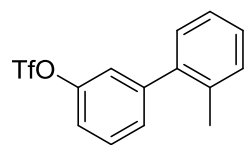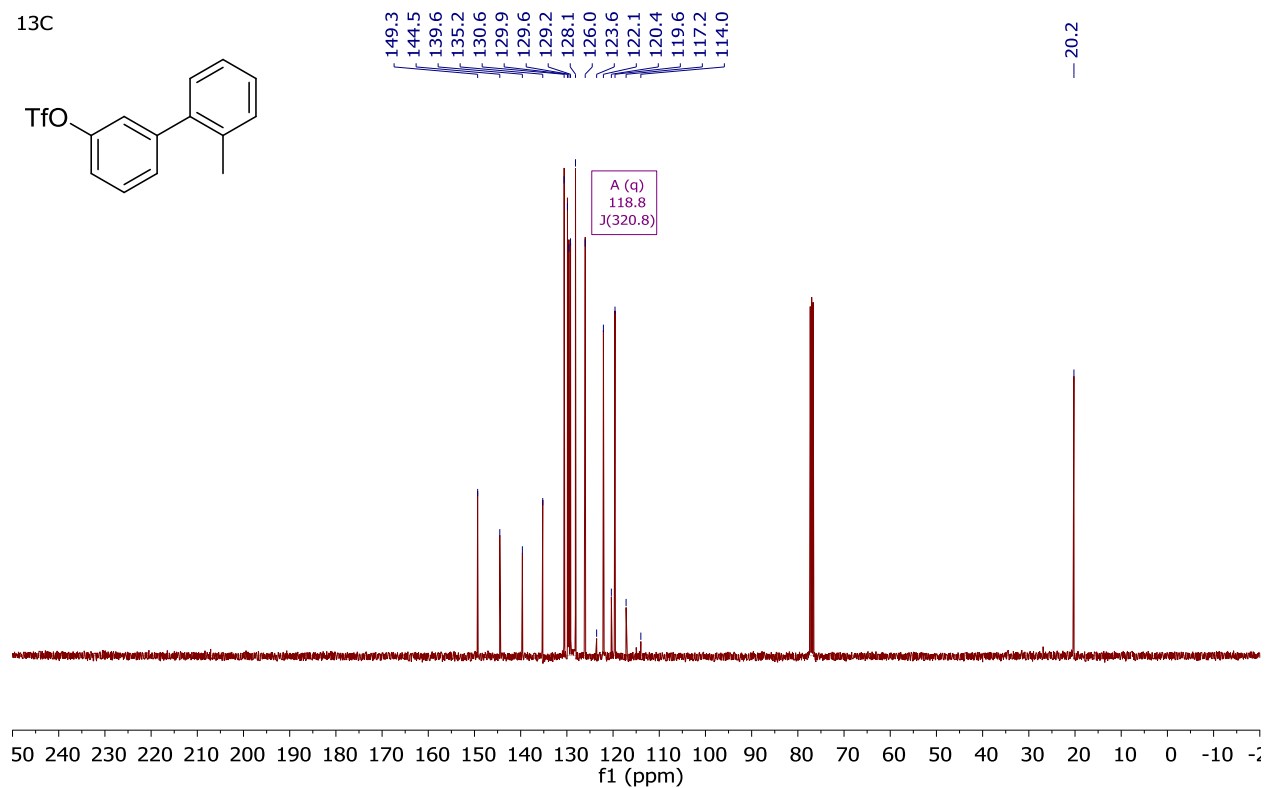

19F

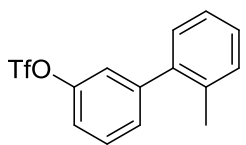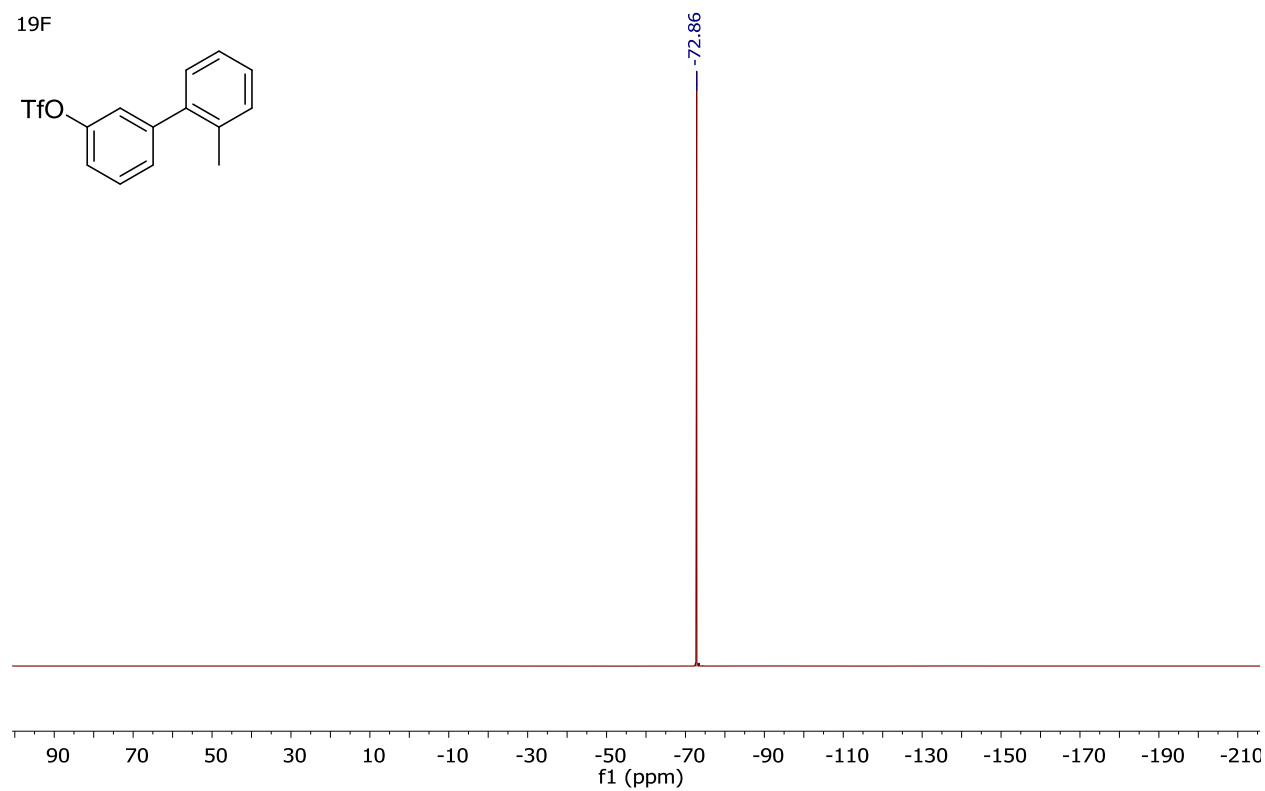

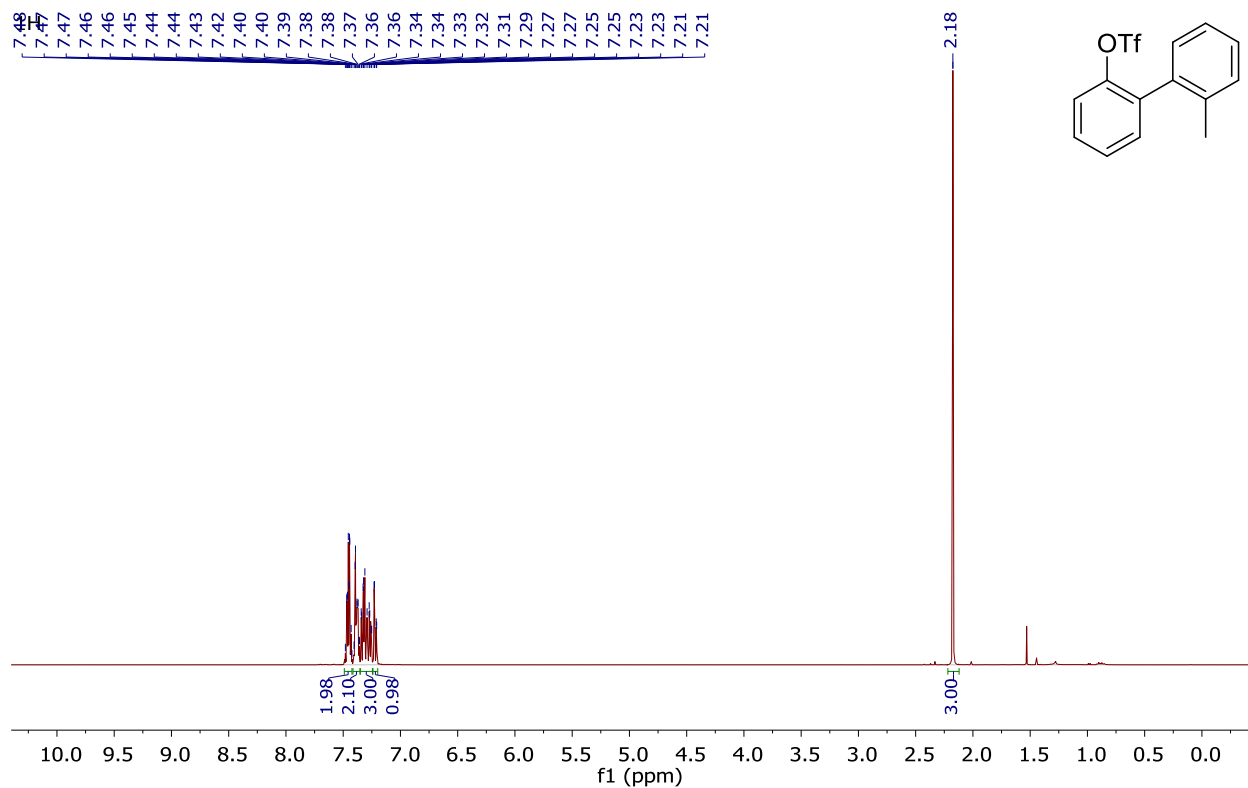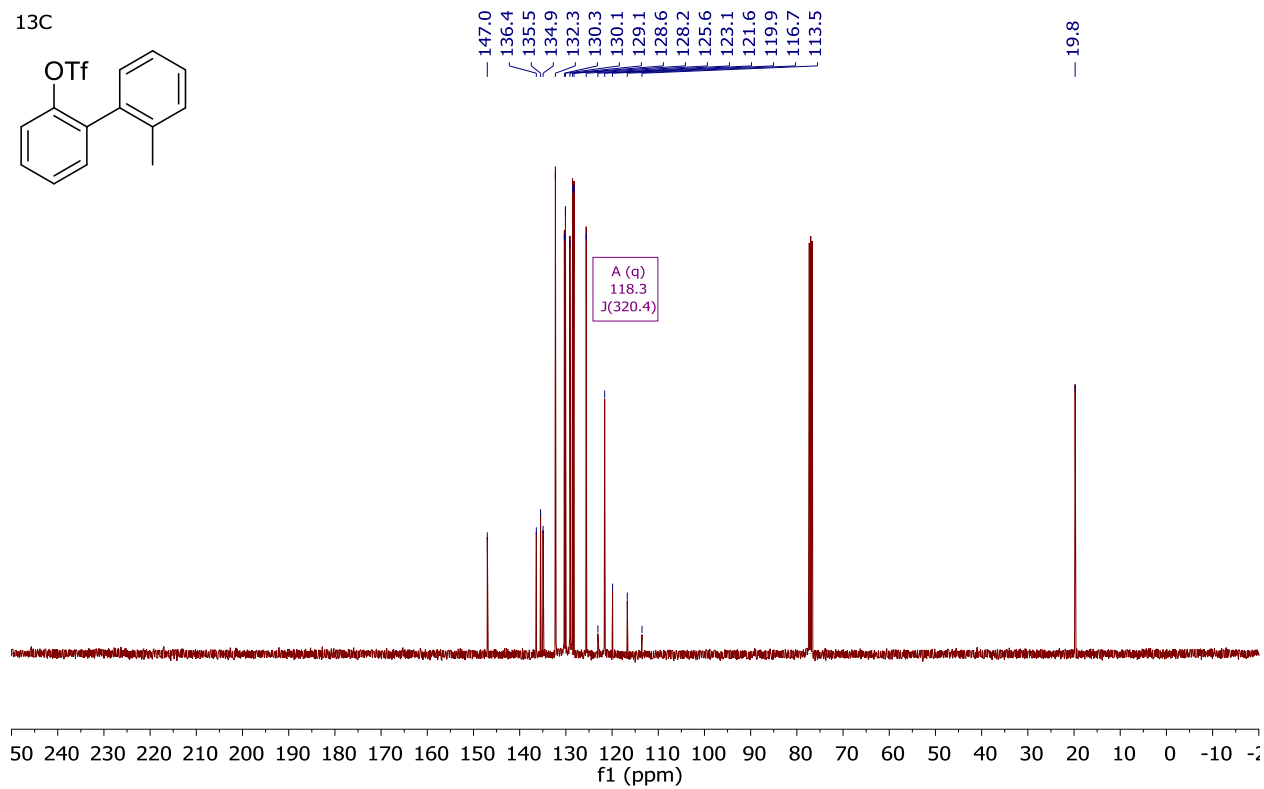

19F

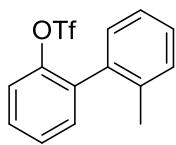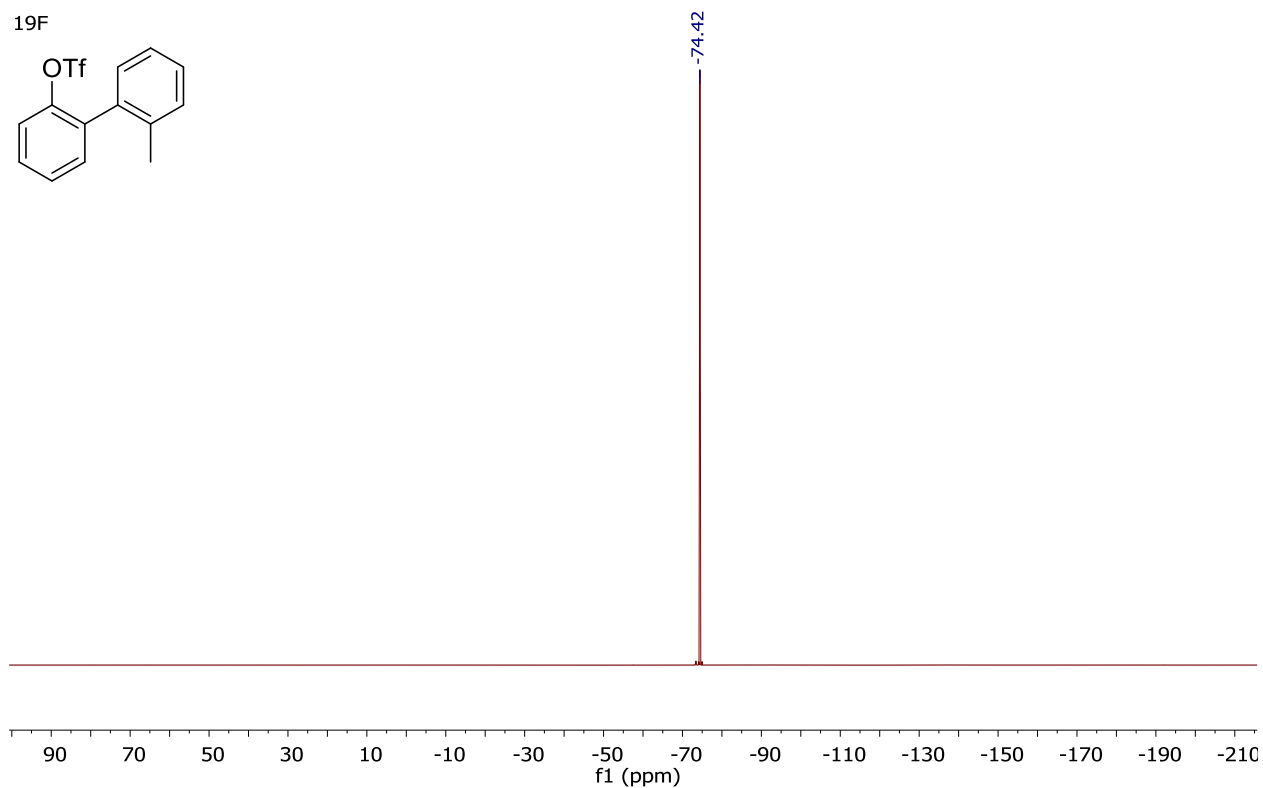

1H

8.15  
8.14  
8.12  
8.12  
8.08  
8.08  
7.46  
7.44  
7.37  
7.35  
7.33  
7.31  
7.29  
7.28  
7.25  
7.21  
7.21  
7.20  
7.19

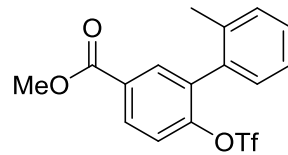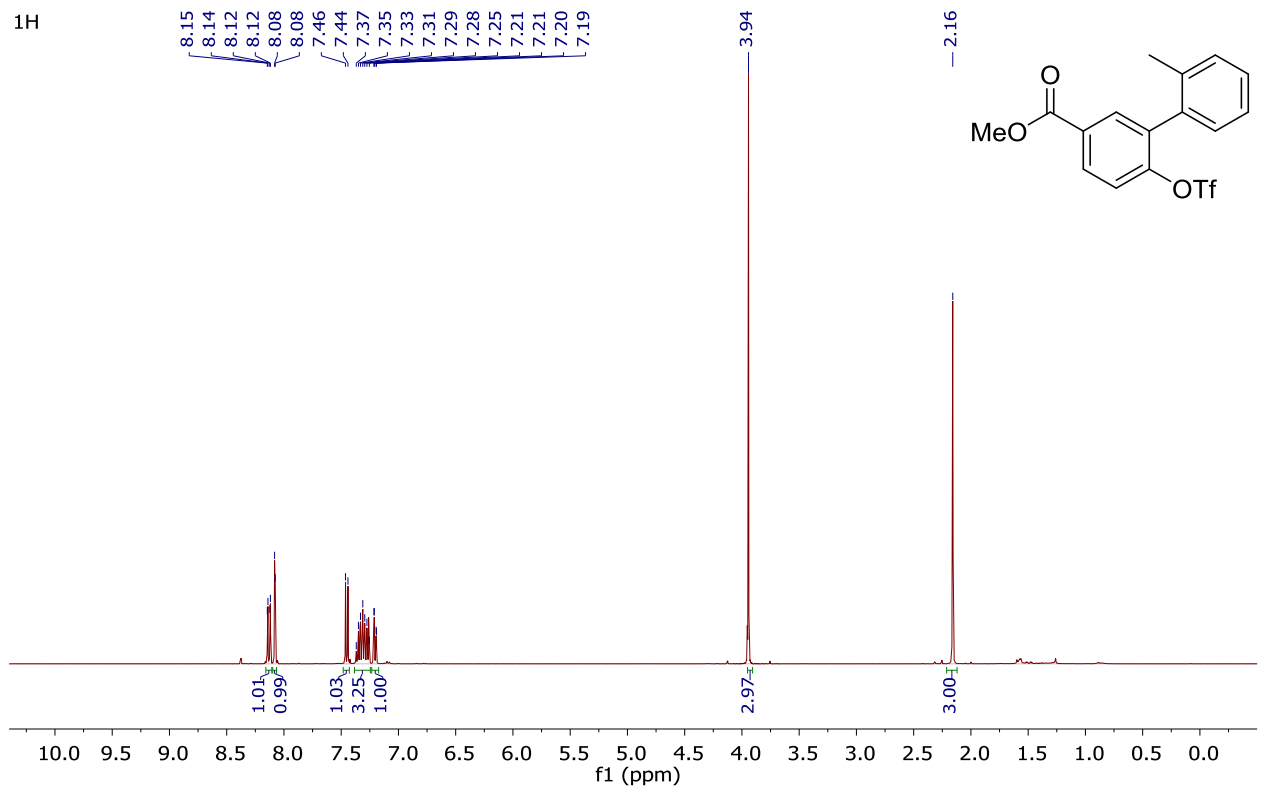

13C

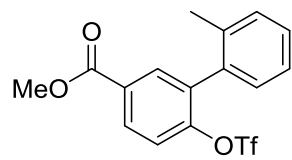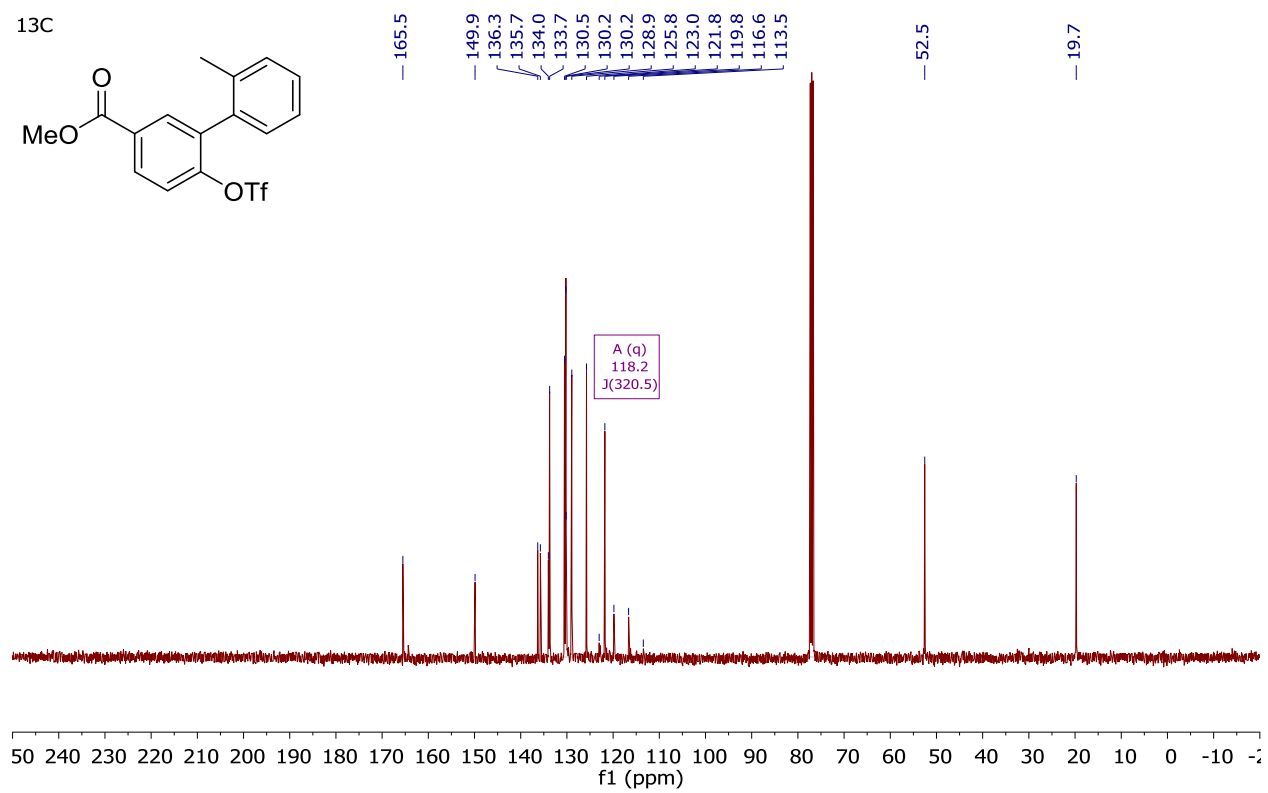

19F

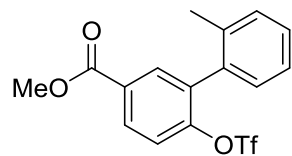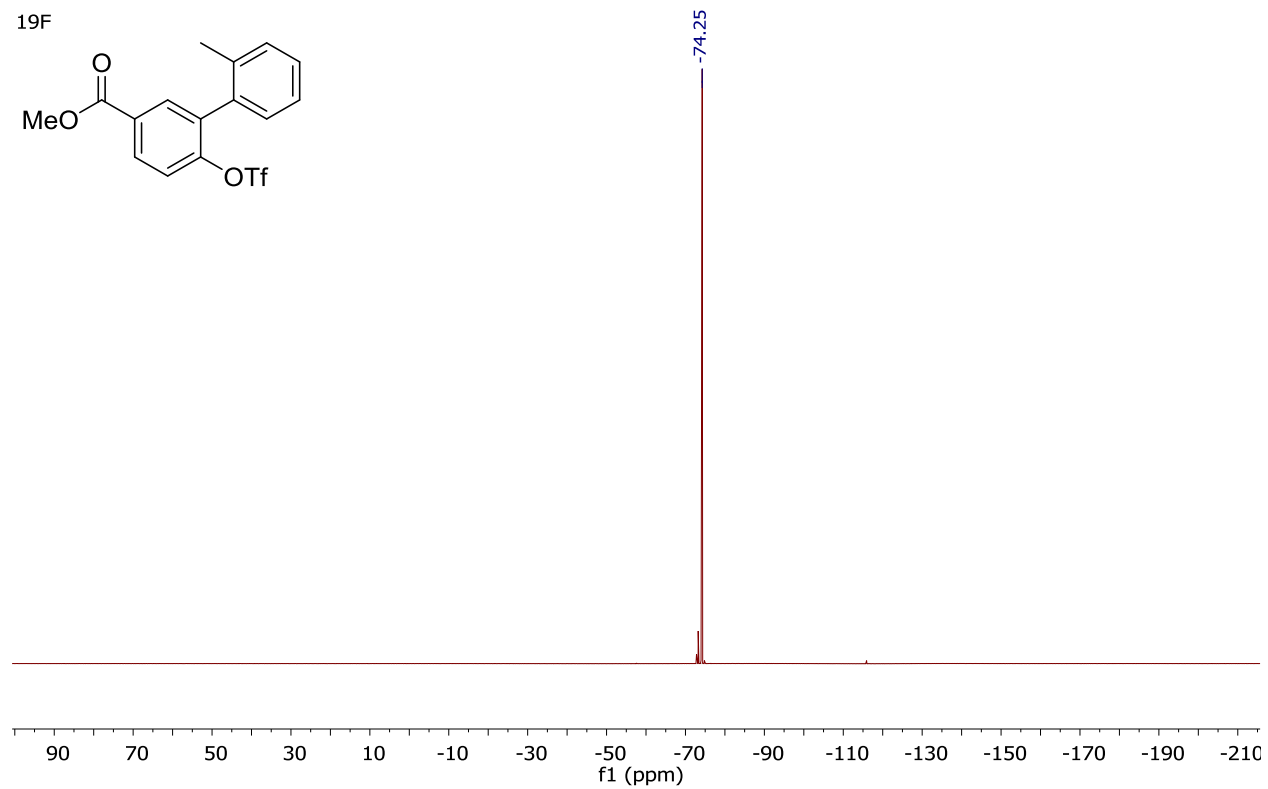

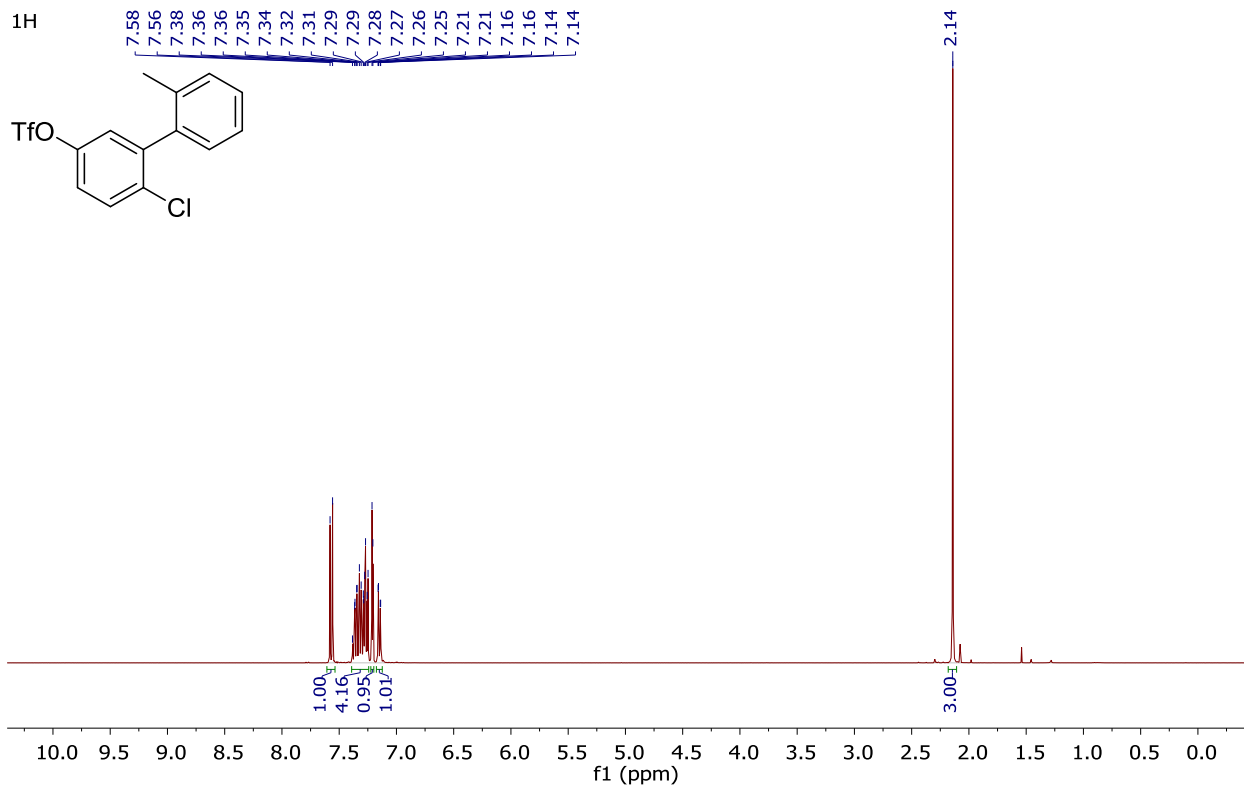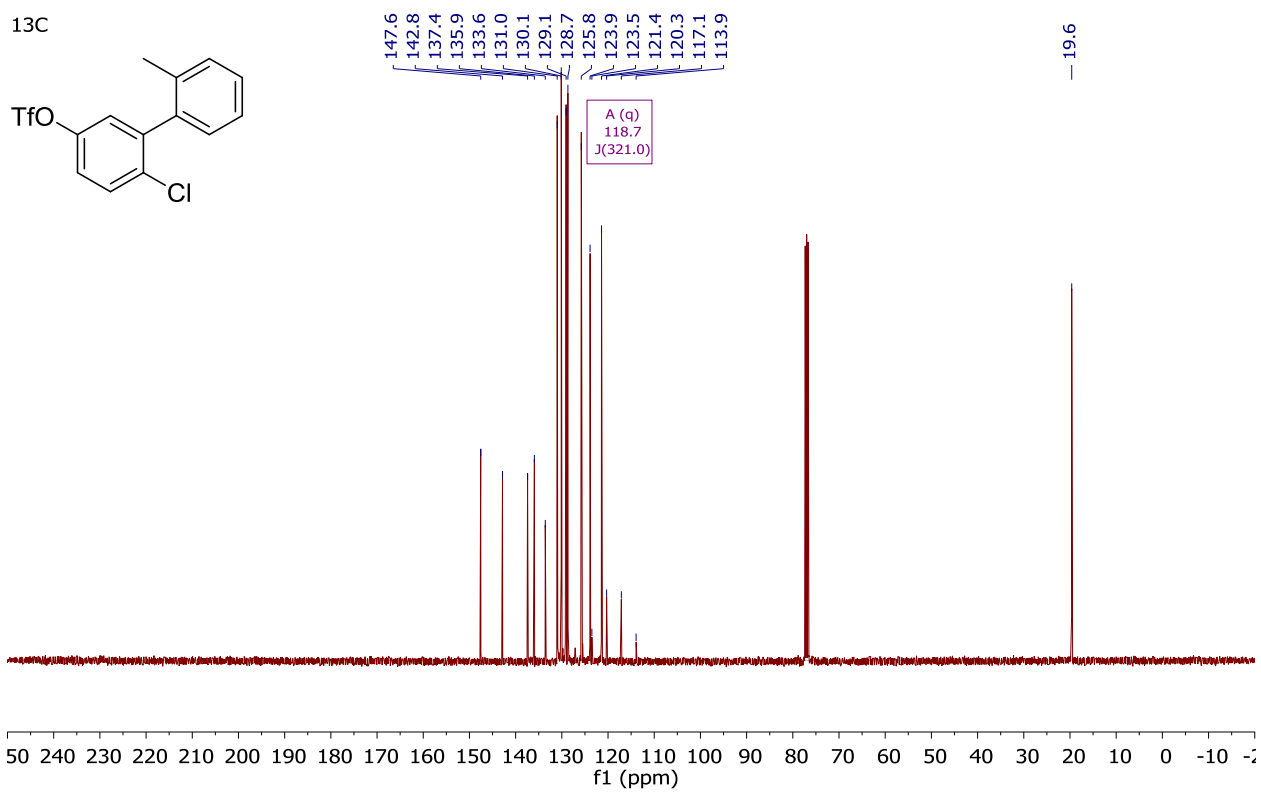

19F

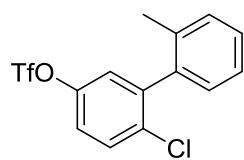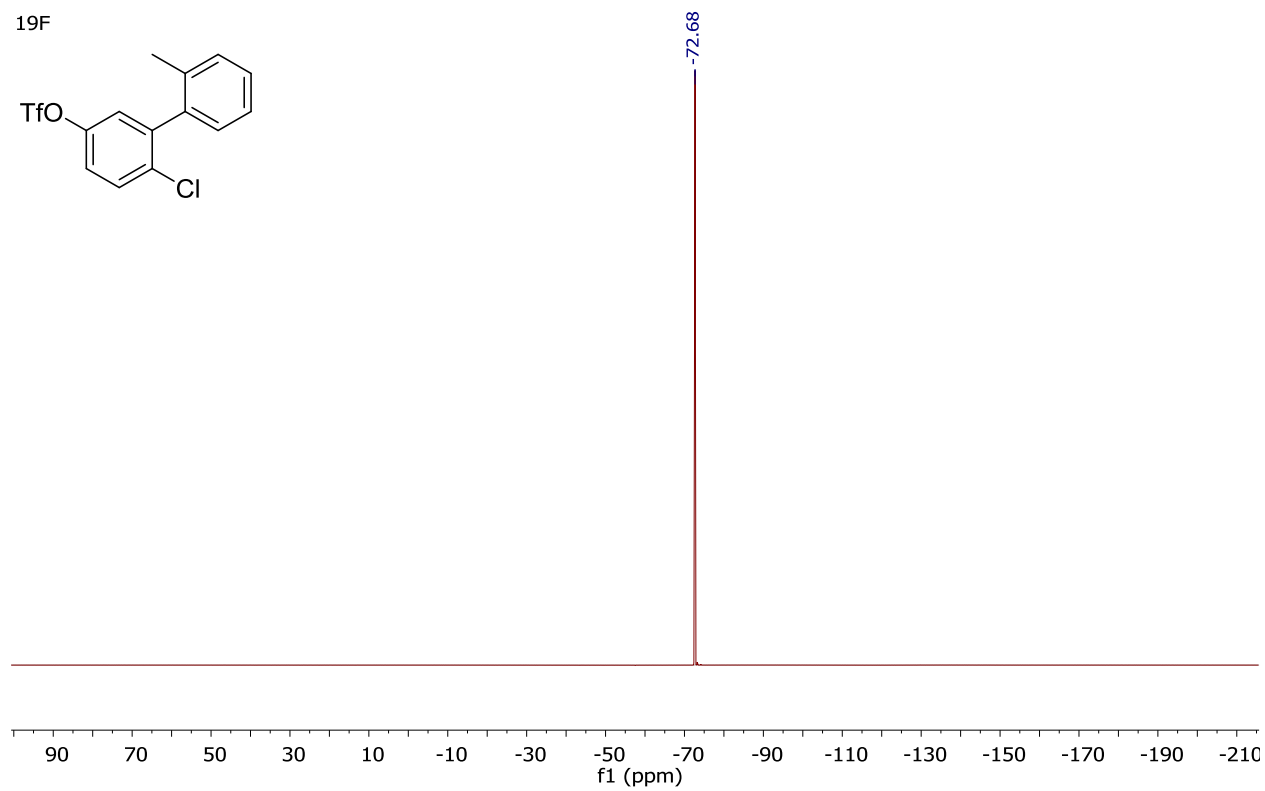

$^1\text{H}$

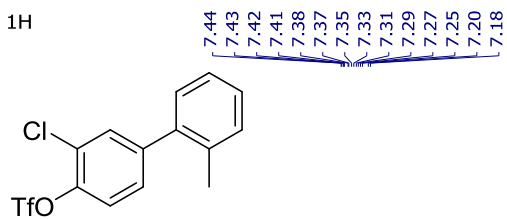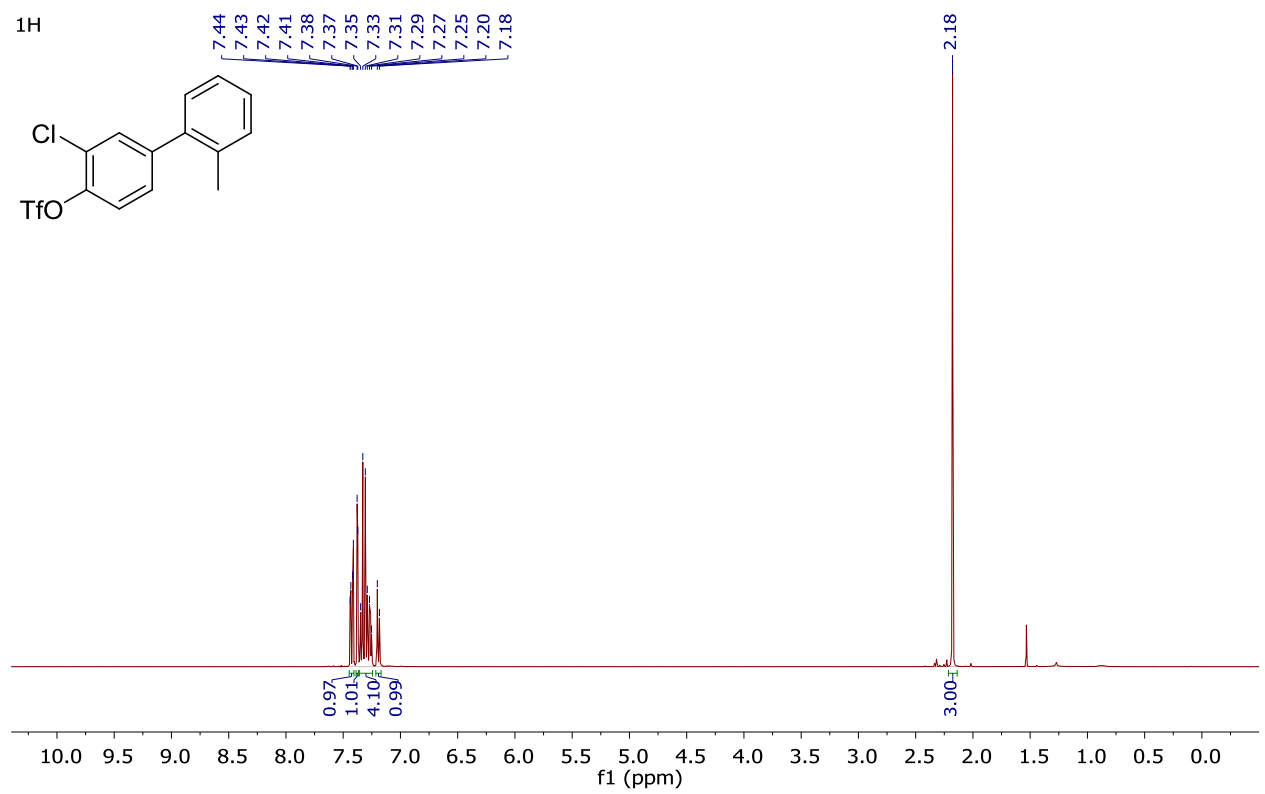



13C

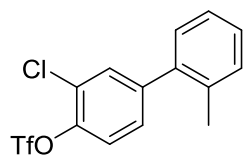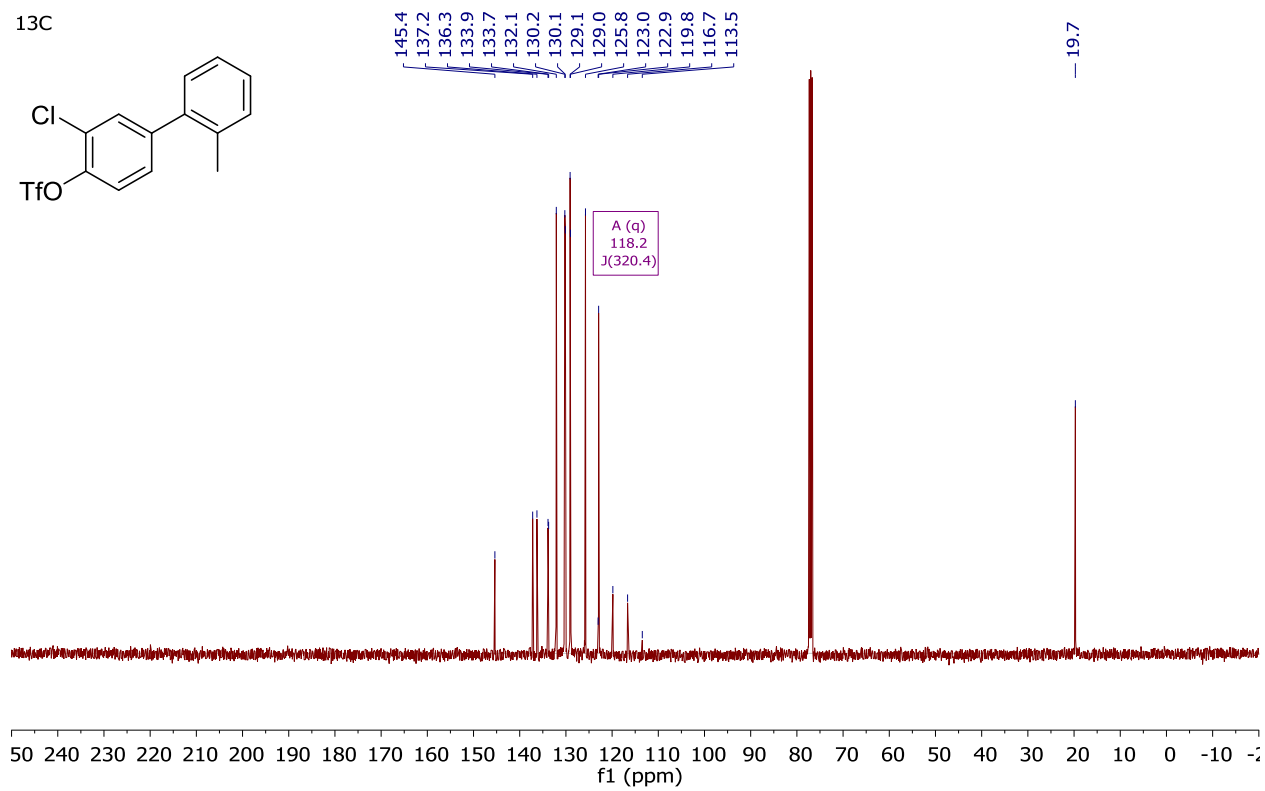

19F

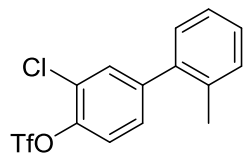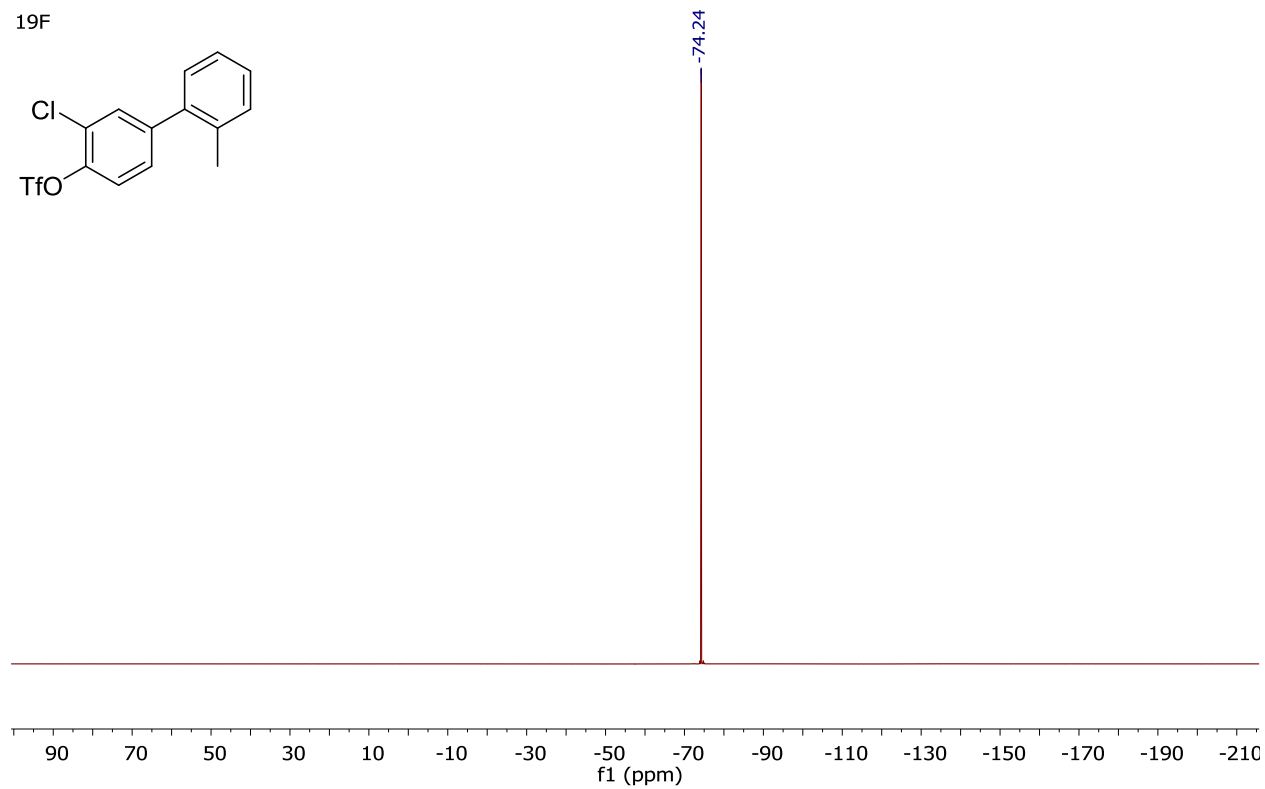

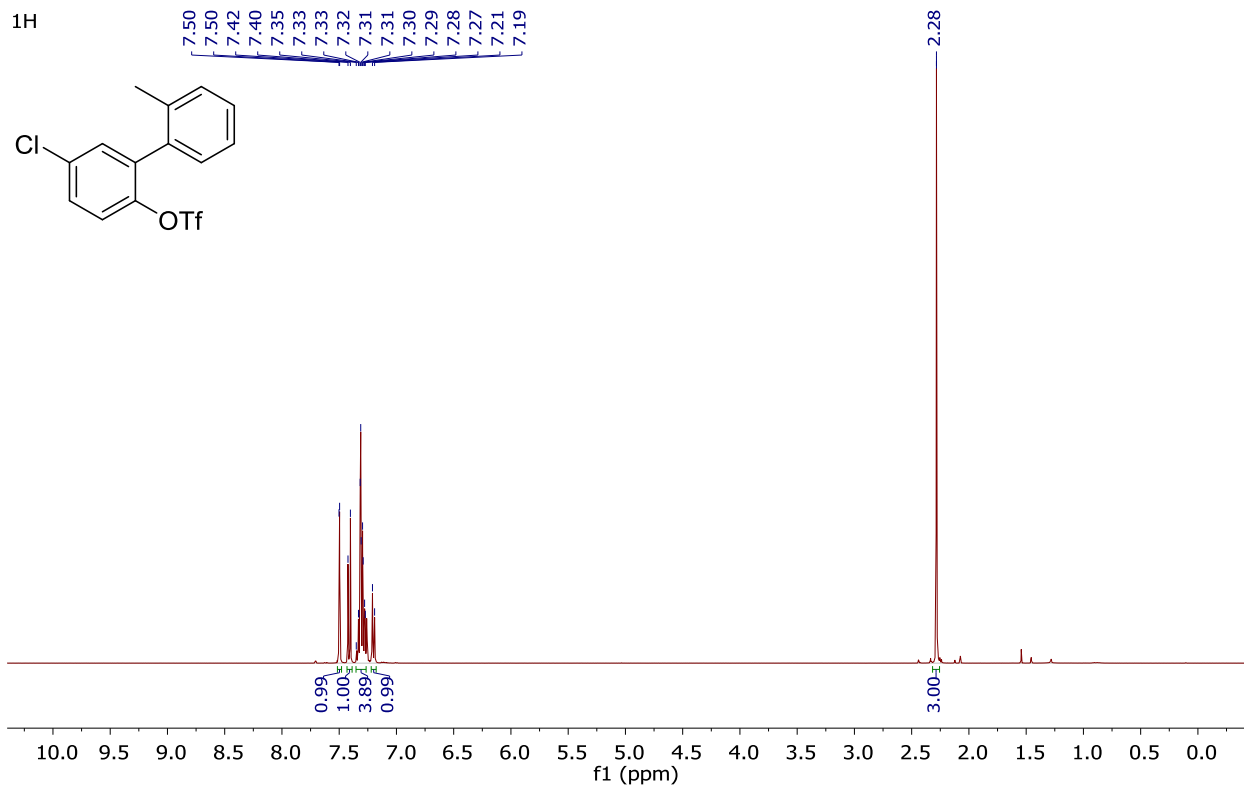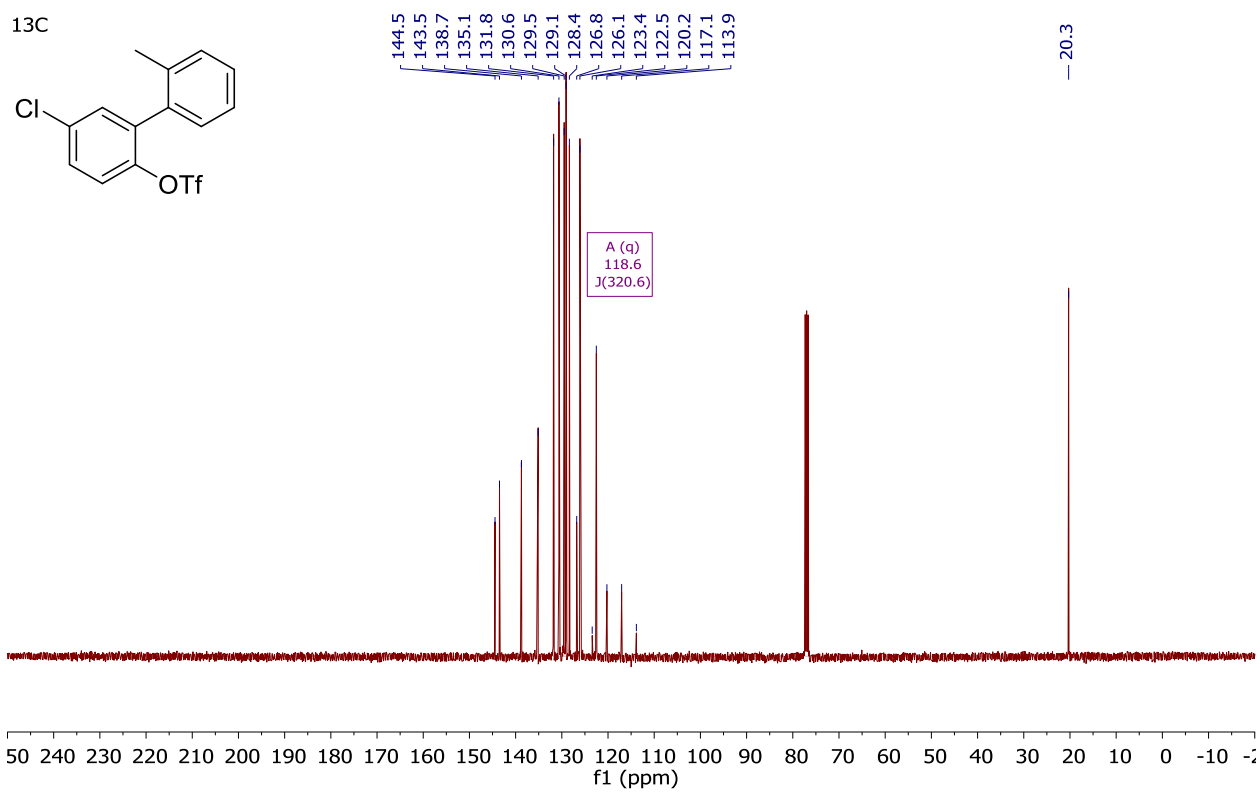

19F

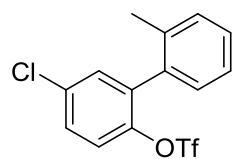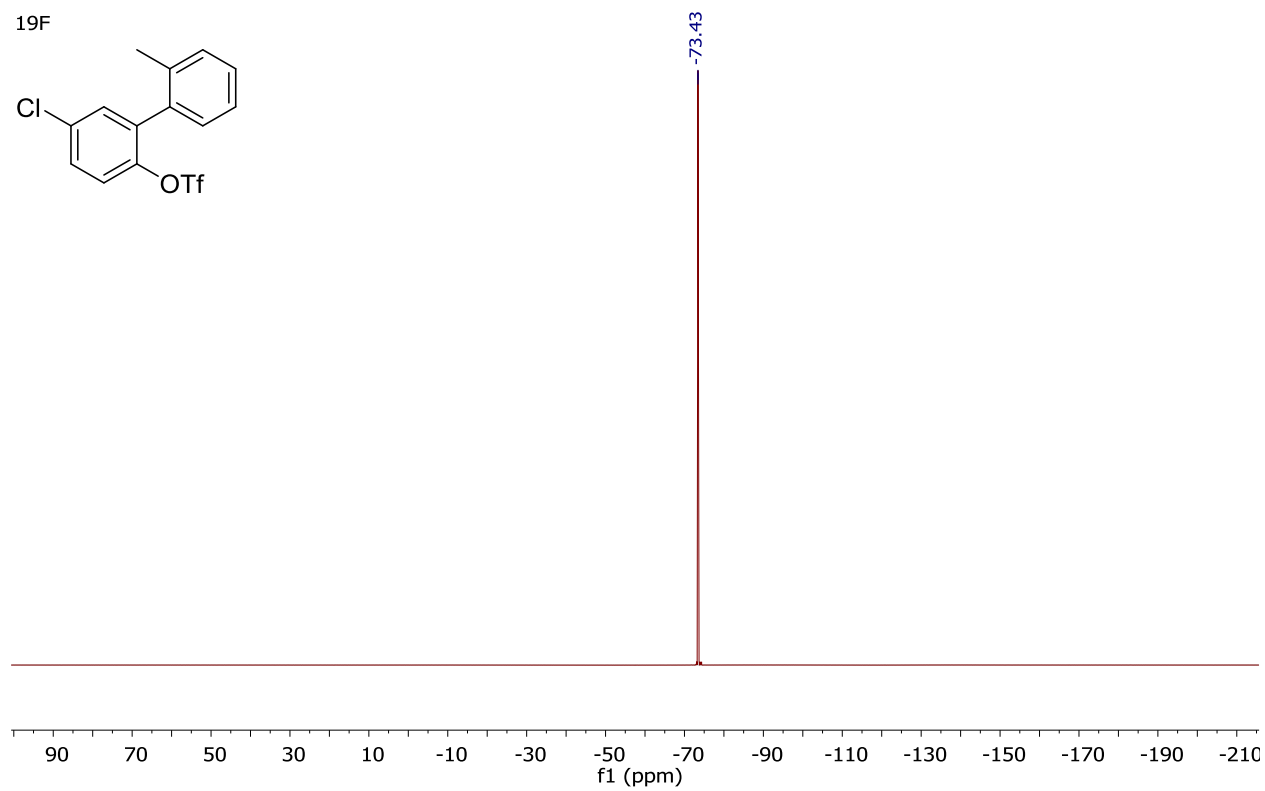

1H

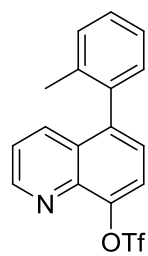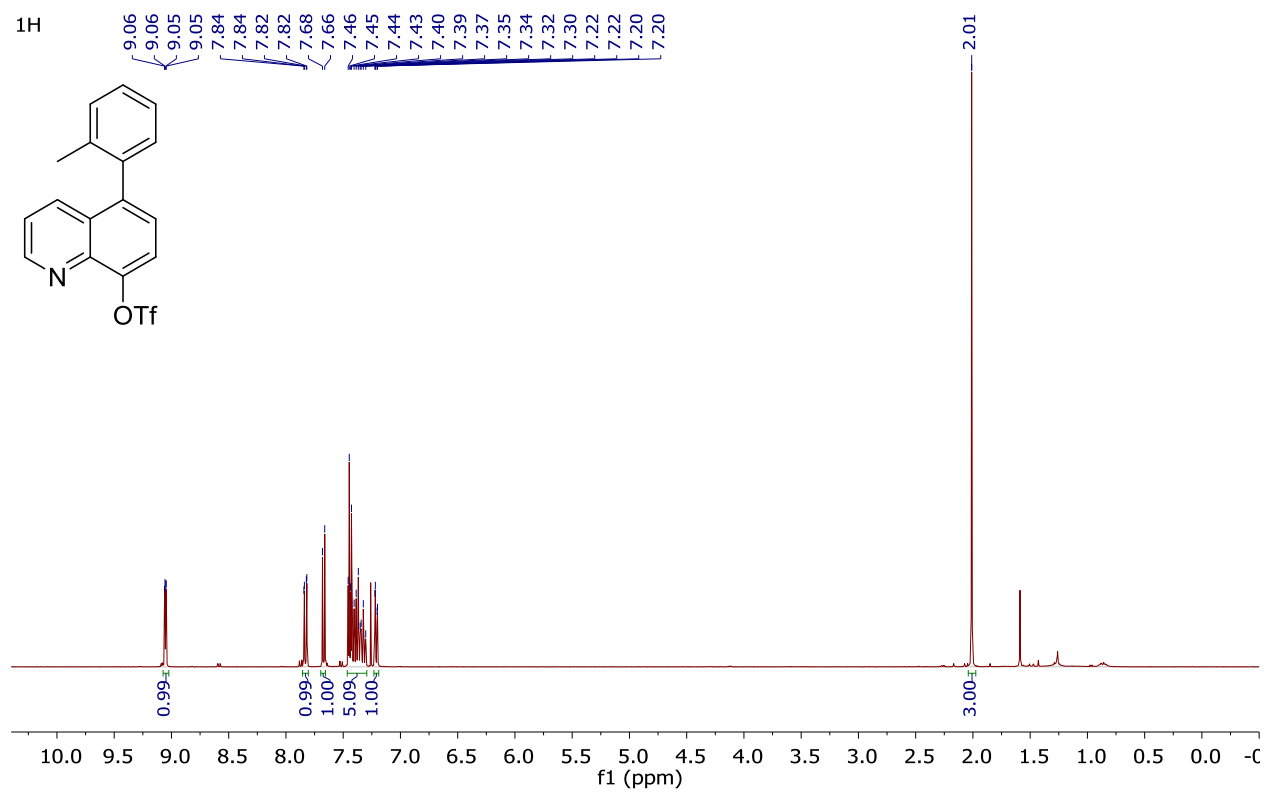

13C

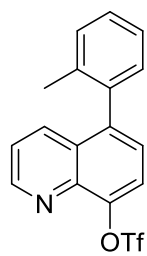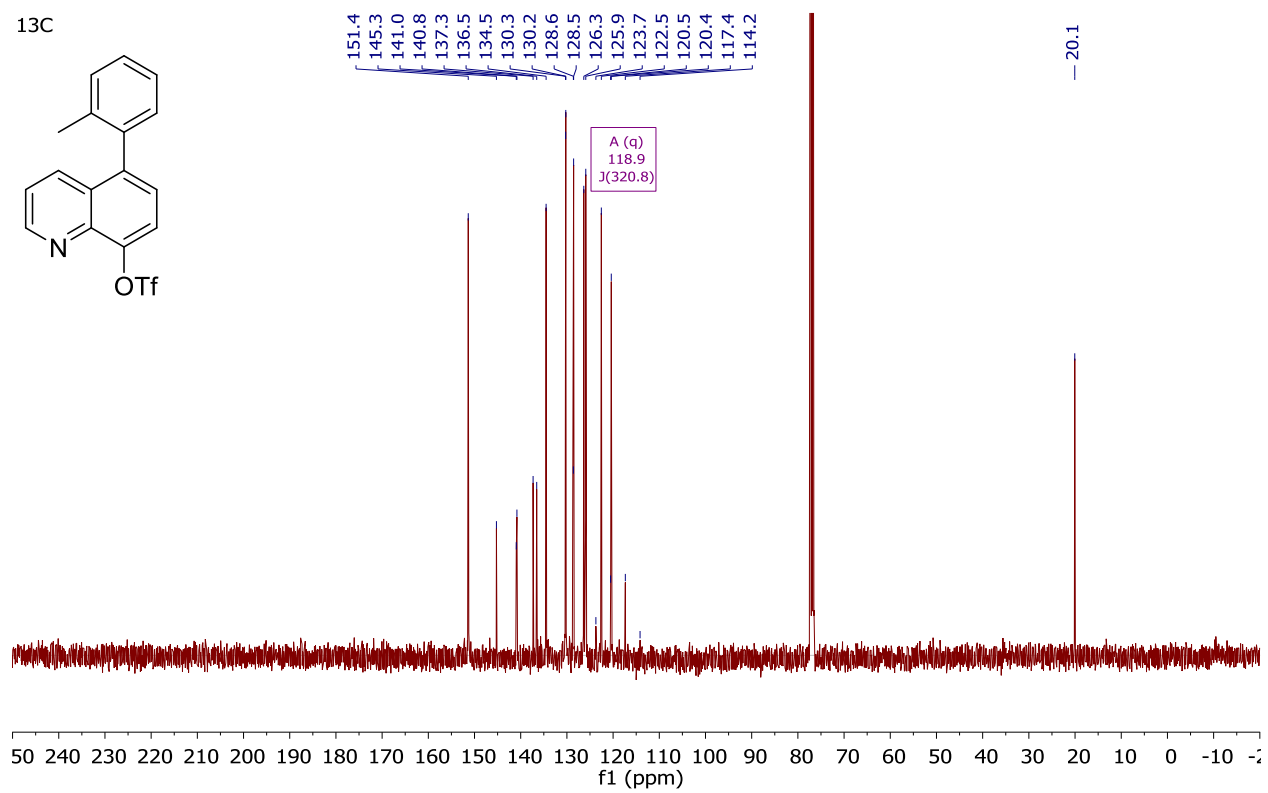

19F

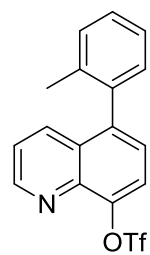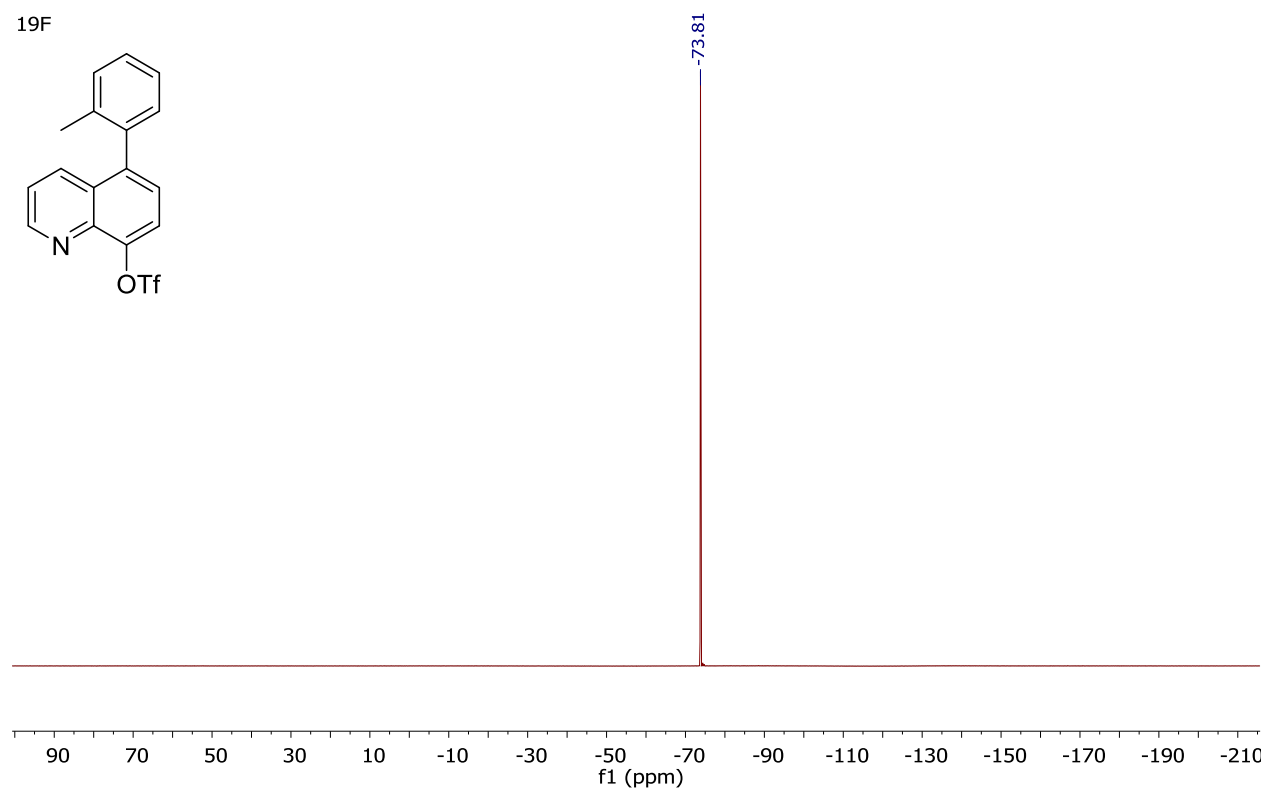

<sup>1</sup>H

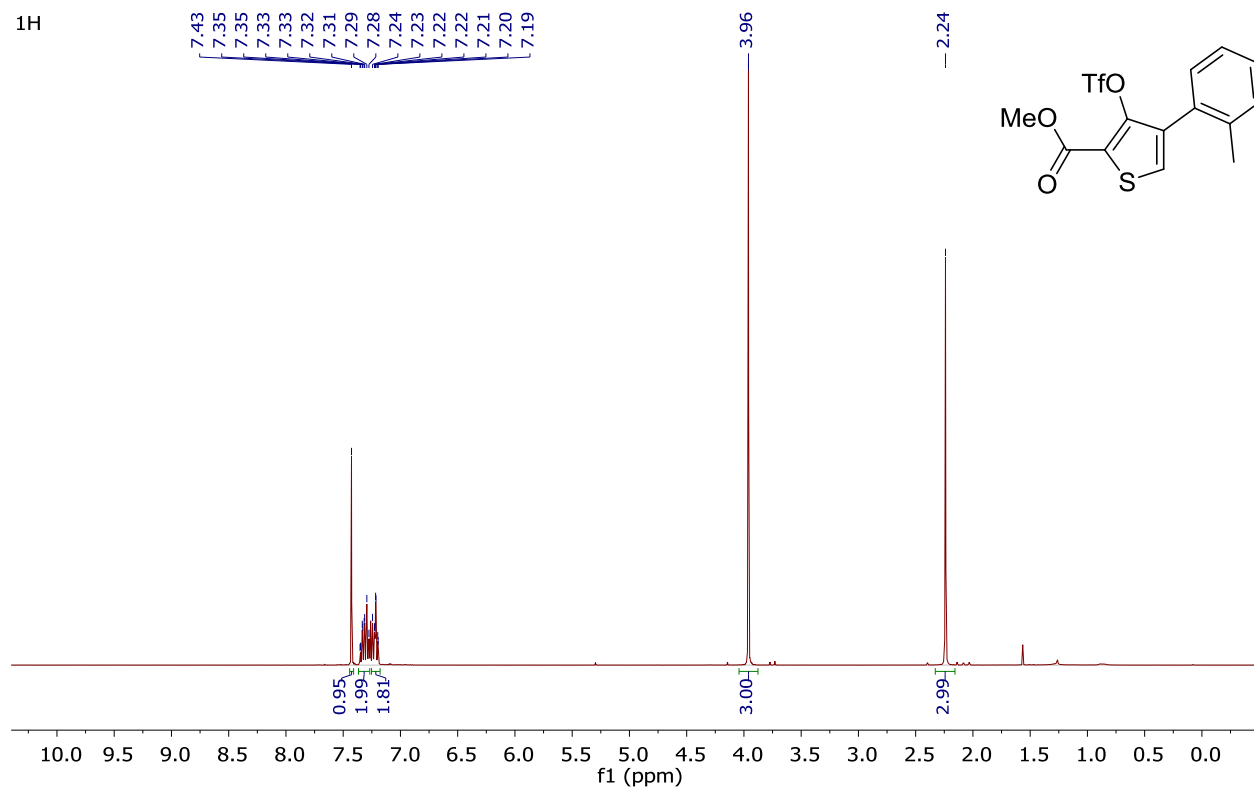

<sup>13</sup>C

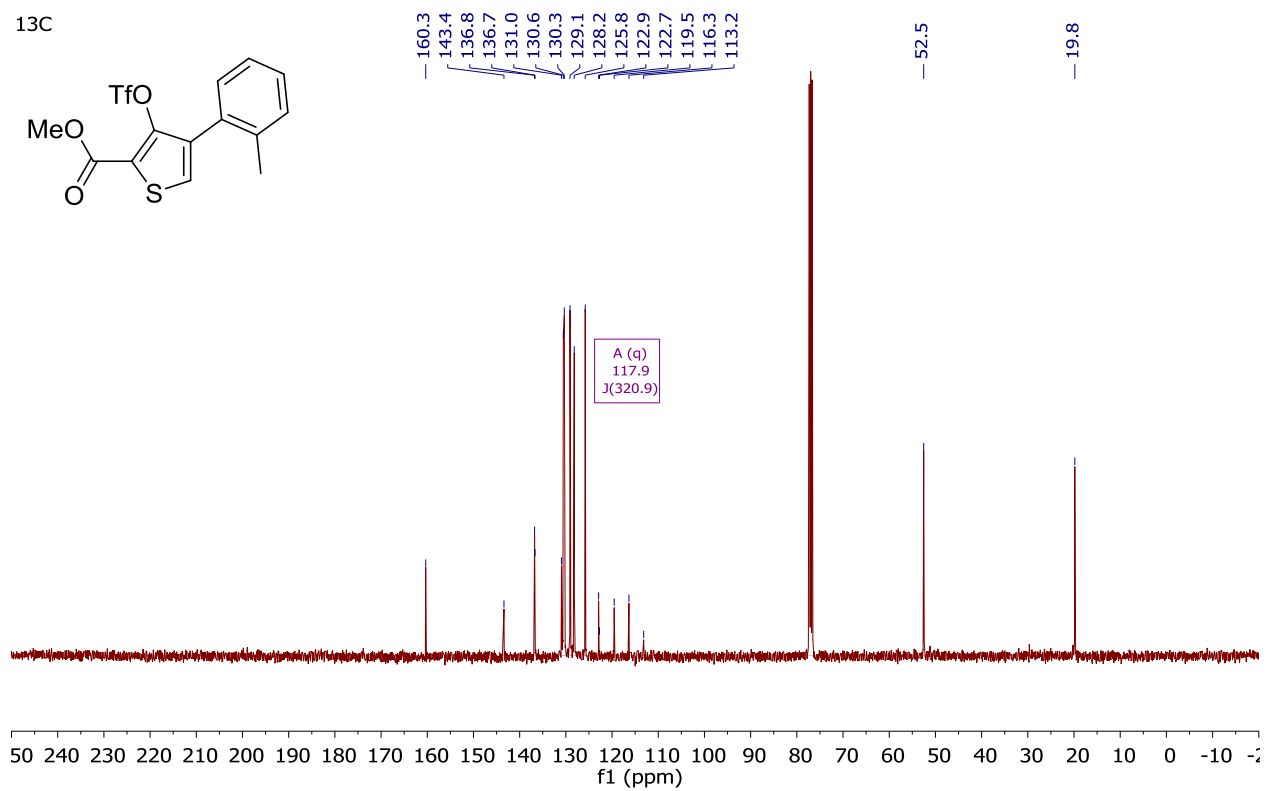

19F

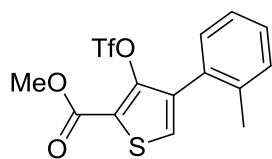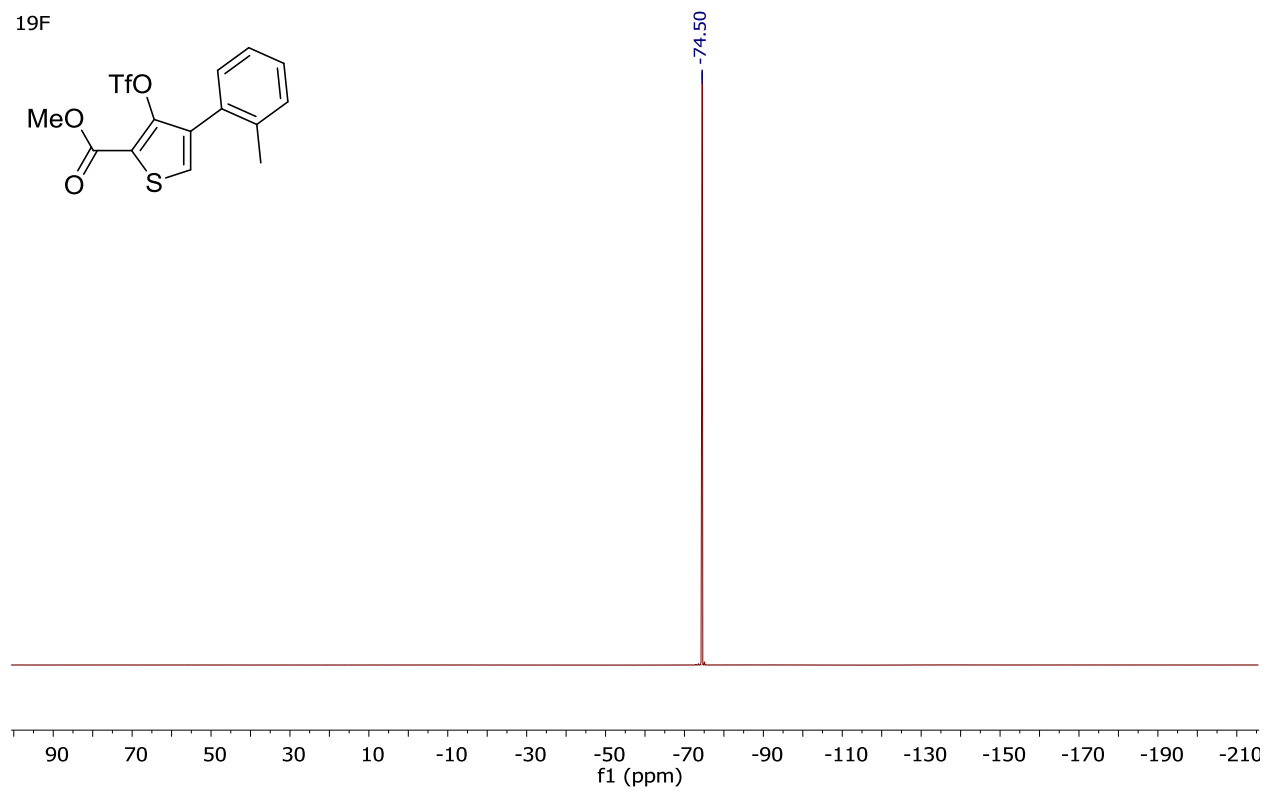

1H

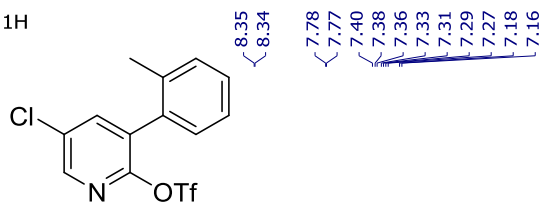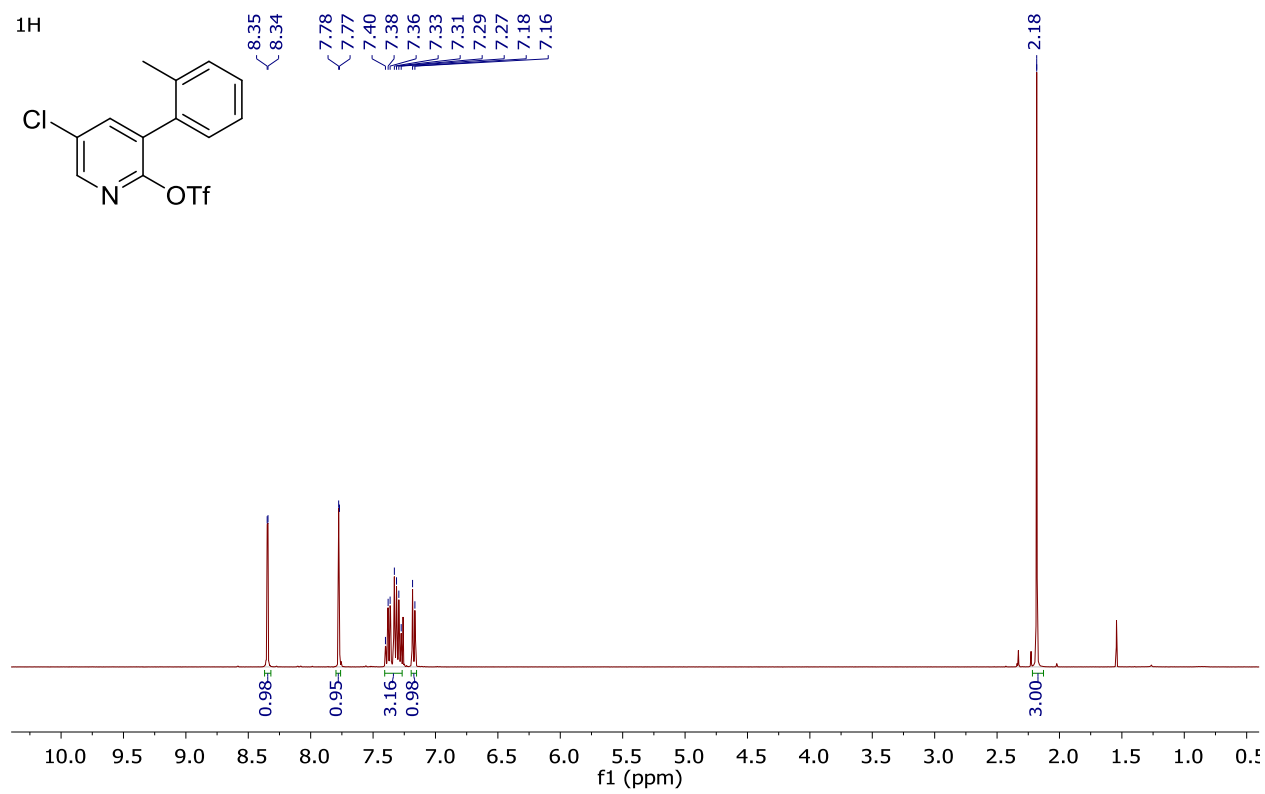

13C

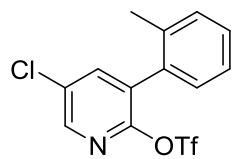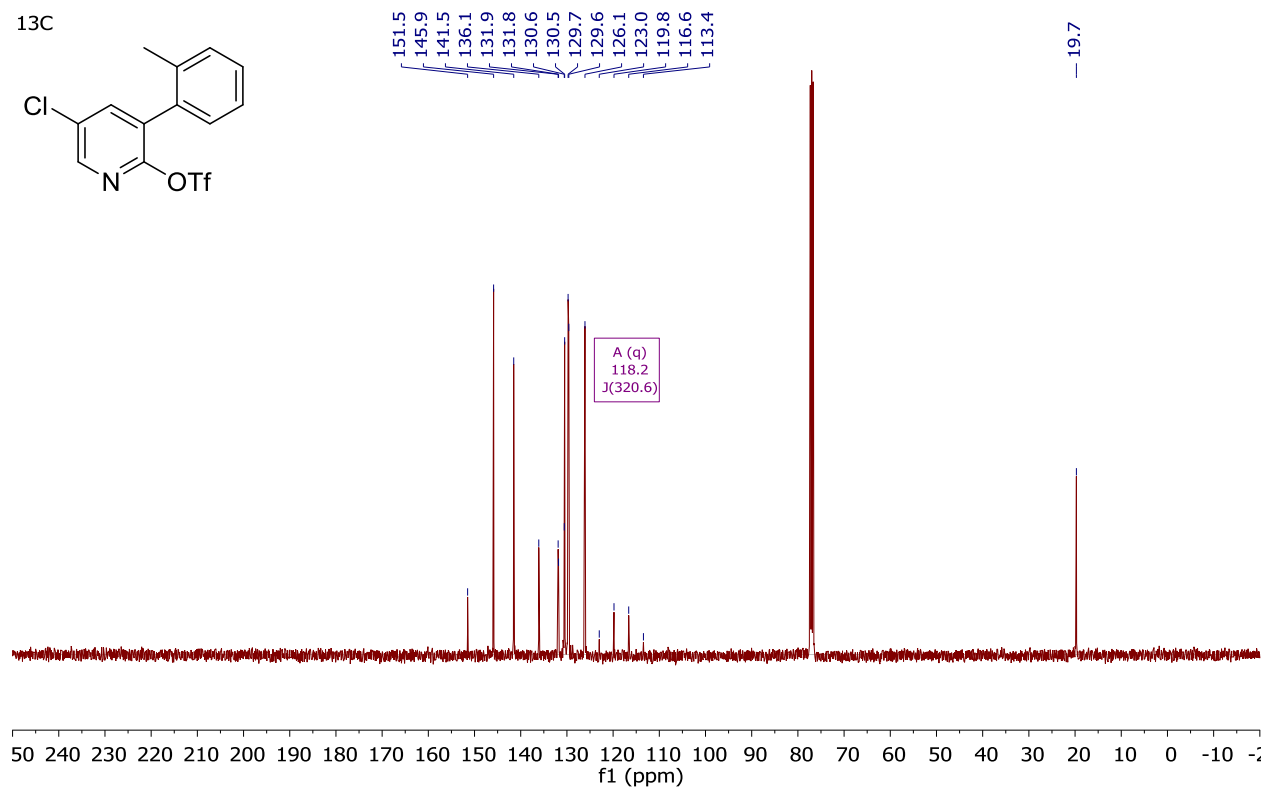

19F

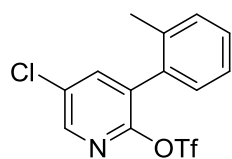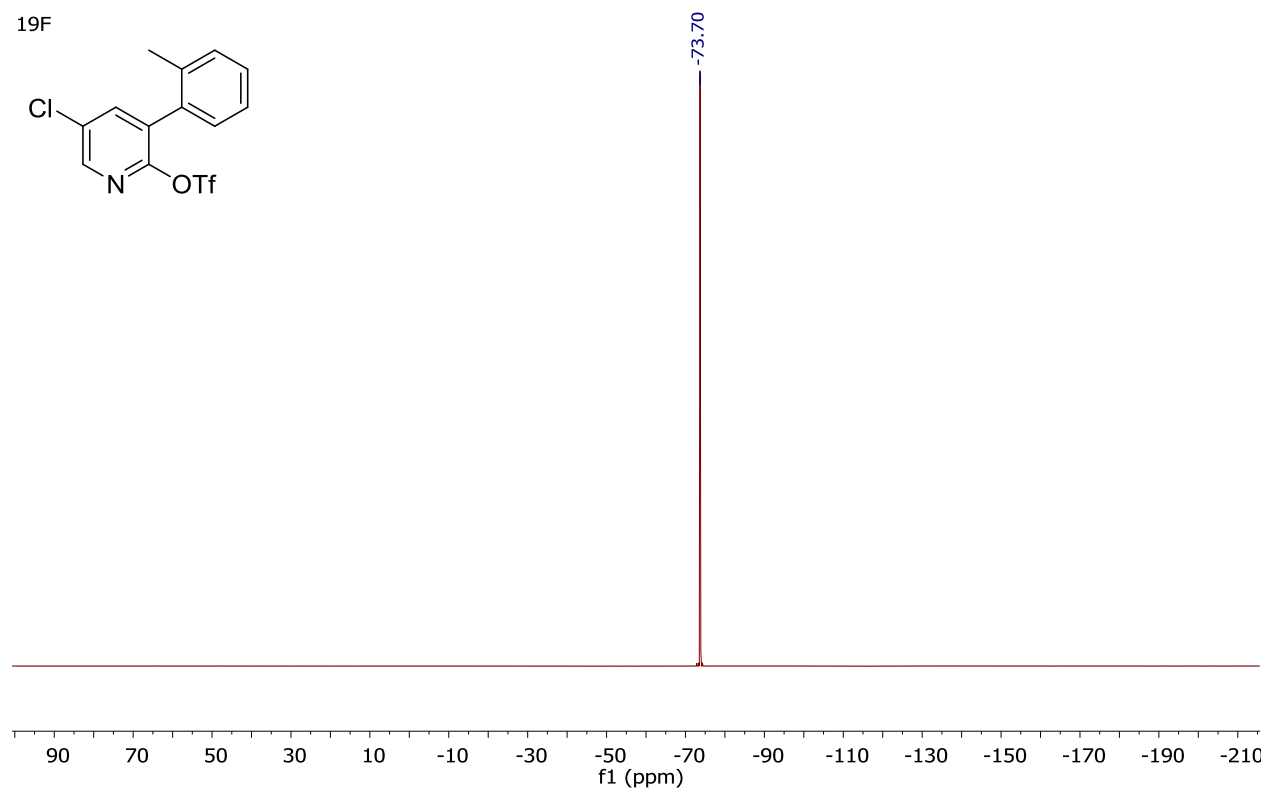

1H

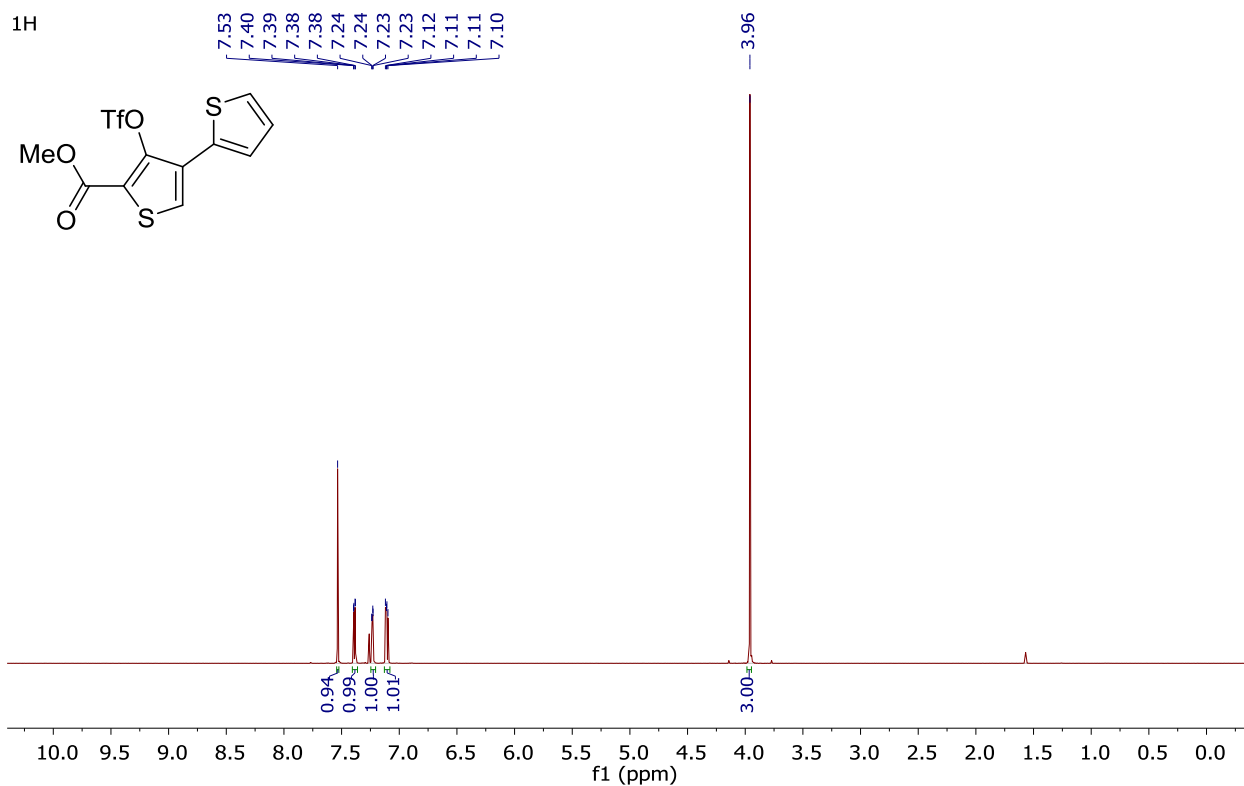

13C

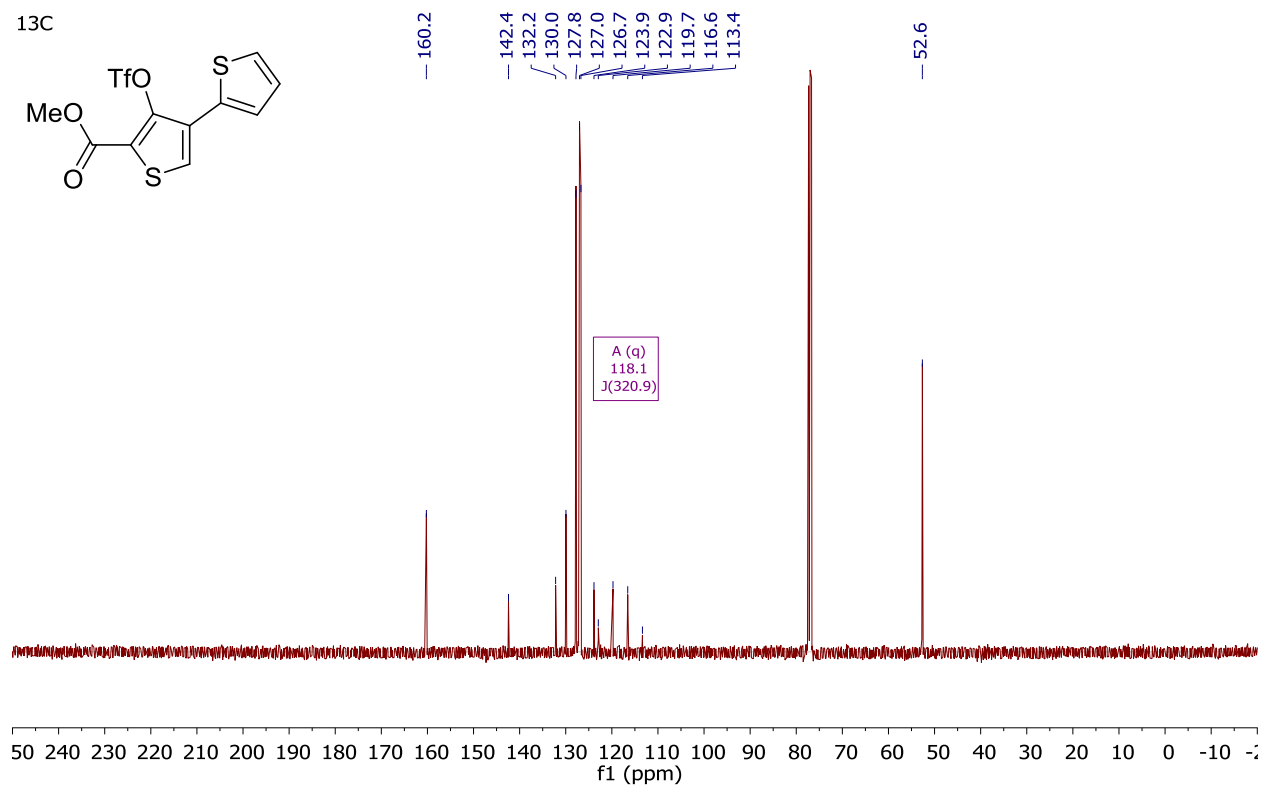



19F

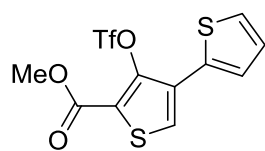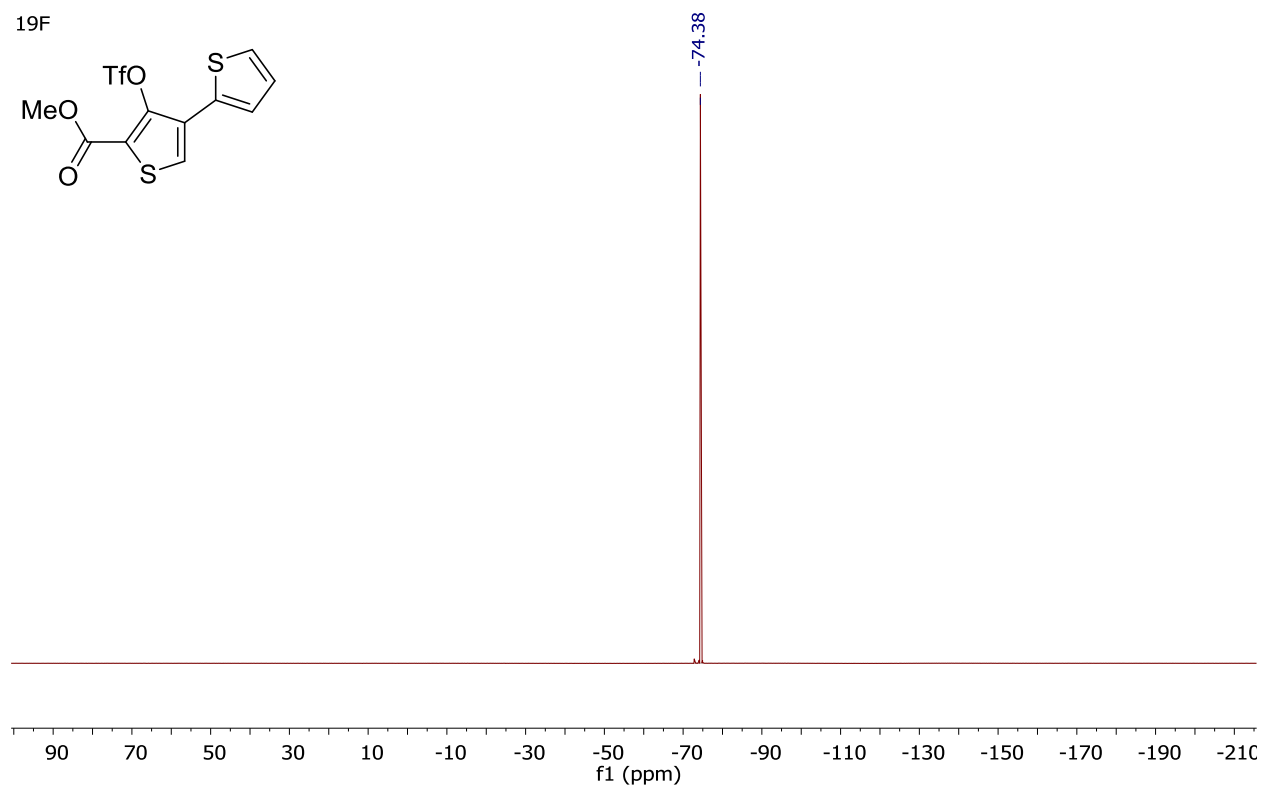

1H

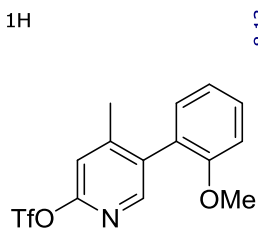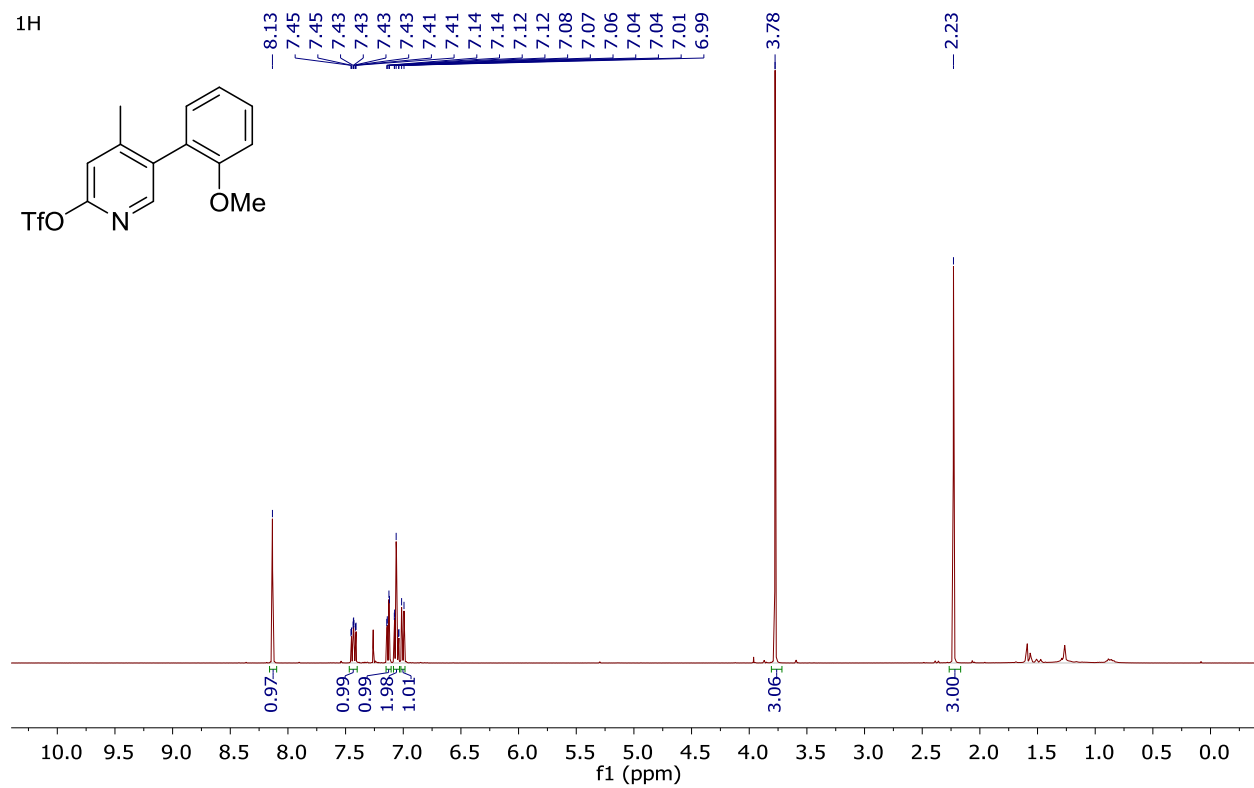

13C

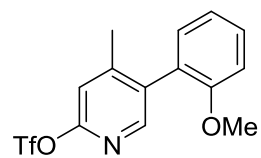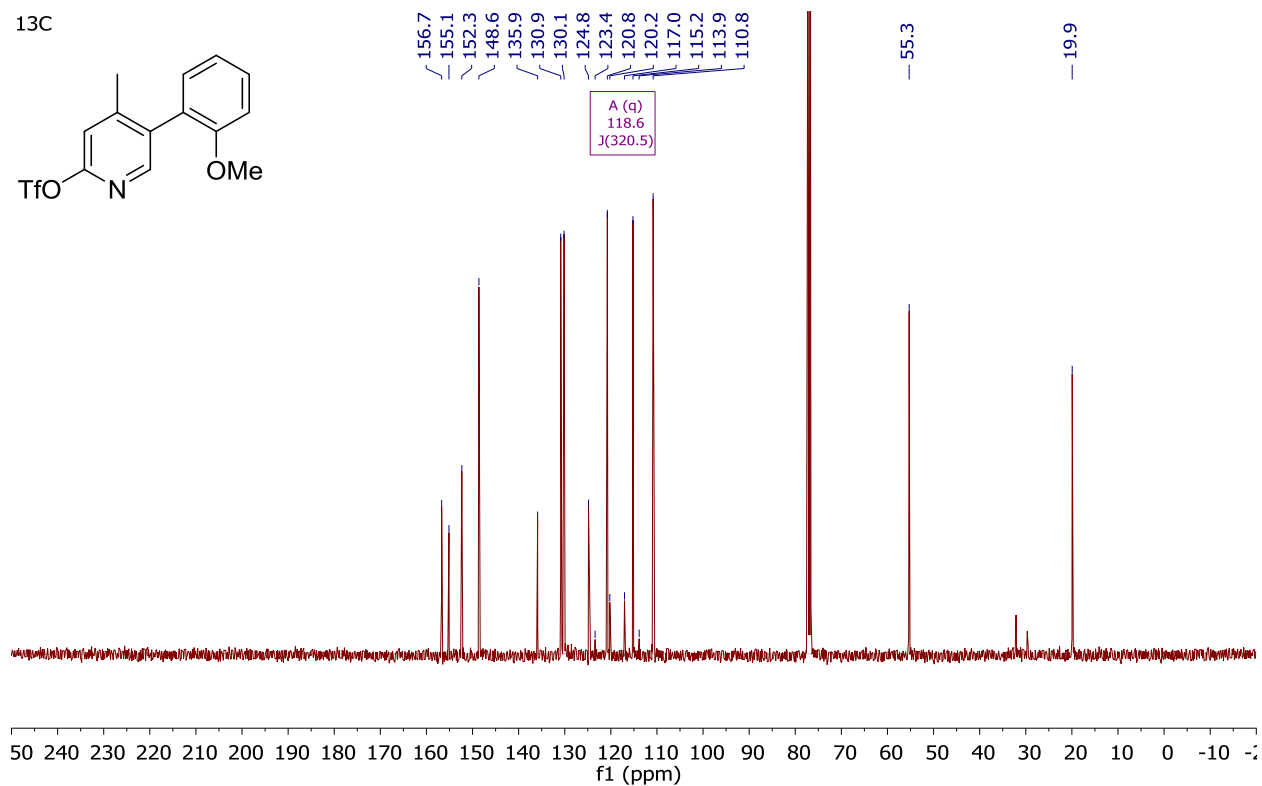

19F

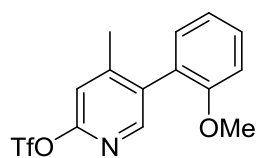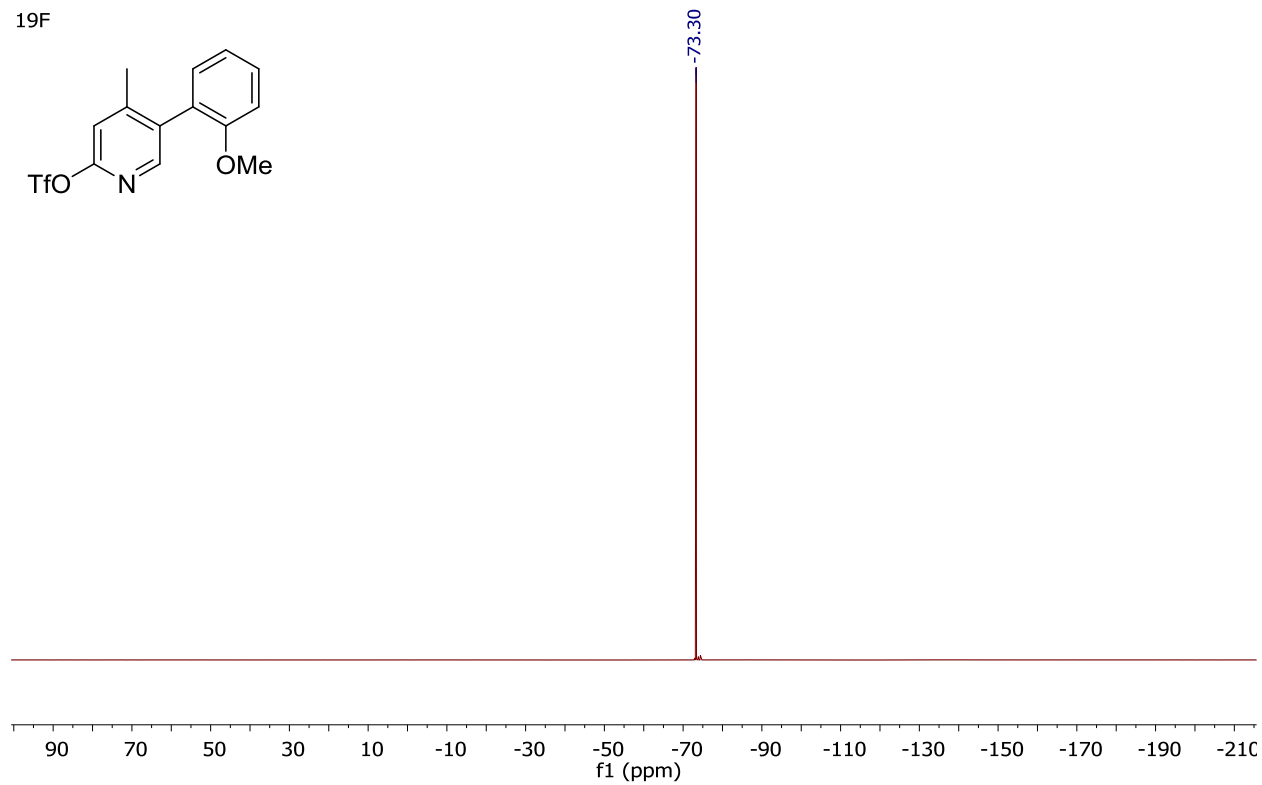

## 7. References

- [1] M. Aufiero, T. Sperger, A. S. K. Tsang, F. Schoenebeck, *Angew. Chem. Int. Ed.* **2015**, *54*, 10322-10326.
- [2] C. Dai, G. C. Fu, *J. Am. Chem. Soc.* **2001**, *123*, 2719-2724.
- [3] F. M. Piller, A. Metzger, M. A. Schade, B. A. Haag, A. Gavryushin, P. Knochel, *Chem. Eur. J.* **2009**, *15*, 7192-7202.
- [4] T. Kamikawa, T. Hayashi, *Tetrahedron Lett.* **1997**, *38*, 7087-7090.
- [5] J. Fontana, A., M. Dawson, Z. Xia, WO2011079305, **2011**.
- [6] P. I. Jolly, N. Fleary-Roberts, S. O'Sullivan, E. Doni, S. Zhou, J. A. Murphy, *Org. Biomol. Chem.* **2012**, *10*, 5807-5810.
- [7] A. J. Kendall, C. A. Salazar, P. F. Martino, D. R. Tyler, *Organometallics* **2014**, *33*, 6171-6178.
- [8] G. Espino, A. Kurbangalieva, J. M. Brown, *Chem. Commun.* **2007**, 1742-1744.
- [9] Y. Norimine, K. Takeda, K. Hagiwara, Y. Suzuki, Y. Ishihara, N. Sato, US20130143907, **2013**.
- [10] V. Giulio Matassa, N. Aguilar Izquierdo, M. Mir Cepeda, M. Carrascal Riera, S. Fonquerna Pou, A. Cardus Figueras, L. J. C. Castro Palomino, M. Erra Sola, EP2202232, **2010**.
- [11] A. M. Dyke, D. M. Gill, J. N. Harvey, A. J. Hester, G. C. Lloyd-Jones, M. P. Muñoz, I. R. Shepperson, *Angew. Chem. Int. Ed.* **2008**, *47*, 5067-5070.
- [12] Z. Khaddour, O. A. Akrawi, A. M. Hamdy, A. Suleiman, K. Jamous, A. Villinger, P. Langer, *Tetrahedron Lett.* **2015**, *56*, 554-557.
- [13] J. Wang, M. A. Seefeld, J. Luengo, *Tetrahedron Lett.* **2011**, *52*, 6346-6348.
- [14] A. F. Littke, C. Dai, G. C. Fu, *J. Am. Chem. Soc.* **2000**, *122*, 4020-4028.
- [15] J.-Q. Wang, R. G. Harvey, *Tetrahedron* **2002**, *58*, 5927-5931.
- [16] Á. Mosquera, R. Riveiros, J. P. Sestelo, L. A. Sarandeses, *Org. Lett.* **2008**, *10*, 3745-3748.
- [17] F. Proutiere, E. Lyngvi, M. Aufiero, I. A. Sanhueza, F. Schoenebeck, *Organometallics* **2014**, *33*, 6879-6884.
- [18] Gaussian 09, Revision D.01, Frisch, M. J.; Trucks, G. W.; Schlegel, H. B.; Scuseria, G. E.; Robb, M. A.; Cheeseman, J. R.; Scalmani, G.; Barone, V.; Mennucci, B.; Petersson, G. A.; Nakatsuji, H.; Caricato, M.; Li, X.; Hratchian, H. P.; Izmaylov, A. F.; Bloino, J.; Zheng, G.; Sonnenberg, J. L.; Hada, M.; Ehara, M.; Toyota, K.; Fukuda, R.; Hasegawa, J.; Ishida, M.; Nakajima, T.; Honda, Y.; Kitao, O.; Nakai, H.; Vreven, T.; Montgomery, J. A., Jr.; Peralta, J. E.; Ogliaro, F.; Bearpark, M.; Heyd, J. J.; Brothers, E.; Kudin, K. N.; Staroverov, V. N.; Kobayashi, R.; Normand, J.; Raghavachari, K.; Rendell, A.; Burant, J. C.; Iyengar, S. S.; Tomasi, J.; Cossi, M.; Rega, N.; Millam, J. M.; Klene, M.; Knox, J. E.; Cross, J. B.; Bakken, V.; Adamo, C.; Jaramillo, J.; Gomperts, R.; Stratmann, R. E.; Yazyev, O.; Austin, A. J.; Cammi, R.; Pomelli, C.; Ochterski, J. W.; Martin, R. L.; Morokuma, K.; Zakrzewski, V. G.; Voth, G. A.; Salvador, P.; Dannenberg, J. J.; Dapprich, S.; Daniels, A. D.; Farkas, Ö.; Foresman, J. B.; Ortiz, J. V.; Cioslowski, J.; Fox, D. J. Gaussian, Inc., Wallingford CT, 2009.
